# Supplementary material for: Direct C–H sulfonylation of hydrazones involving the insertion of SO2
Source: Royal Society of Chemistry journal article supplement (doi:10.1039/d4qo00835a), 2024-01-01

*Supporting Information*

**Direct C–H Sulfonation of Hydrazones Involving the Insertion of SO<sub>2</sub>**

*Mengzhao Yu, Shuizhen Lin, Shuoshuo Zhang, Xinkui Lin and Xiaolei Huang\**

Key Laboratory of the Ministry of Education for Advanced Catalysis Materials,  
College of Chemistry and Materials Science, Zhejiang Normal University, Jinhua,  
Zhejiang 321004, China. E-mails: huangxl@zjnu.edu.cn

## Table of Contents

- I. General remarks
- II. General procedure for the three-component sulfonylation of hydrazones
- III. General procedure for the sulfonylation of hydrazones with sulfonyl chlorides
- IV. Gram scale procedure for the synthesis of **3a**
- V. Procedure for radical capture experiment with 1,1-diphenylethylene
- VI. References
- VII. Copies of NMR spectra

## I. General remarks

NMR spectra were obtained on Bruker AV-400 MHz and AV-600 MHz spectrometers. The  $^1\text{H}$  NMR chemical shifts were measured relative to  $\text{CDCl}_3$  as the internal reference ( $\text{CDCl}_3$ :  $\delta = 7.26$  ppm). The  $^{13}\text{C}$  NMR chemical shifts were given using  $\text{CDCl}_3$  and  $\text{DMSO-}d_6$  as the internal standard ( $\text{CDCl}_3$ :  $\delta = 77.16$  ppm;  $\text{DMSO-}d_6$ :  $\delta = 39.52$  ppm). High resolution mass spectra (HRMS) were obtained with a Waters-Q-TOF-Premier (ESI). Melting points were determined with XRC-1 and are uncorrected.

Unless otherwise noted, all reagents were obtained from commercial suppliers and used without further purification. Aldehyde-derived hydrazones were prepared via condensation of hydrazines with aldehydes.<sup>1</sup> Aryldiazonium tetrafluoroborates were prepared according to the literature procedures.<sup>2</sup> Ultra dry solvents were purchased from J&K Scientific.

## II. General procedure for the three-component sulfonylation of hydrazones

Hydrazone **1** (0.2 mmol, 1.0 equiv), aryldiazonium tetrafluoroborate **2** (0.4 mmol, 2.0 equiv), DABSO (0.4 mmol, 2.0 equiv),  $\text{FeCl}_3$  (0.1 mmol, 50 mol%), quinoline (0.1 mmol, 50 mol%) were added to a 10-mL Schlenk tube. The tube was evacuated and backfilled with  $\text{N}_2$  three times before MeCN (2 mL) was added. The reaction mixture was stirred at 25 °C for 24 h. The solvent was evaporated under reduced pressure. The residue was purified directly by flash chromatograph (petroleum ether/EtOAc) to give the corresponding product.

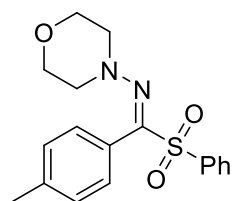

### (*E*)-*N*-Morpholino-1-(phenylsulfonyl)-1-(*p*-tolyl)methanimine (**3a**)<sup>1</sup>

The product was isolated by flash chromatography (petroleum ether/EtOAc = 3/1, v/v) as a white solid. 87% yield. M.p.: 90-91 °C.

$^1\text{H}$  NMR (400 MHz,  $\text{CDCl}_3$ ):  $\delta$  7.75 (d,  $J = 7.6$  Hz, 2H), 7.56–7.52 (m, 1H), 7.43 (t,  $J = 7.6$  Hz, 2H), 7.15–7.11 (m, 4H), 3.58–3.55 (m, 4H), 3.04–3.02 (m, 4H), 2.34 (s, 3H) ppm.

$^{13}\text{C}$  NMR (151 MHz,  $\text{CDCl}_3$ ):  $\delta$  142.76, 140.44, 139.49, 133.02, 129.90, 129.41, 128.86, 128.64, 127.53, 66.10, 54.10, 21.59 ppm.

HRMS (ESI): calcd for  $\text{C}_{18}\text{H}_{21}\text{N}_2\text{O}_3\text{S}$   $[\text{M}+\text{H}]^+$  345.1273, found 345.1268.

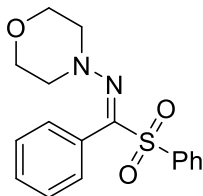

**(E)-N-Morpholino-1-phenyl-1-(phenylsulfonyl)methanimine (3b)<sup>3</sup>**

The product was isolated by flash chromatography (petroleum ether/EtOAc = 3/1, v/v) as a white solid. 90% yield. M.p.: 130-131 °C.

$^1\text{H}$  NMR (400 MHz,  $\text{CDCl}_3$ ):  $\delta$  7.75 (d,  $J$  = 8 Hz, 2H), 7.55 (t,  $J$  = 7.2 Hz, 1H), 7.43 (t,  $J$  = 7.2 Hz, 2H), 7.38 (d,  $J$  = 7.6 Hz, 1H), 7.33 (t,  $J$  = 7.2 Hz, 2H), 7.24 (d,  $J$  = 7.6 Hz, 2H), 3.58–3.56 (m, 4H), 3.05–3.03 (m, 4H) ppm.

$^{13}\text{C}$  NMR (151 MHz,  $\text{CDCl}_3$ ):  $\delta$  142.35, 139.43, 133.12, 130.78, 130.20, 130.15, 128.91, 128.71, 66.13, 54.19 ppm.

HRMS (ESI): calcd for  $\text{C}_{17}\text{H}_{19}\text{N}_2\text{O}_3\text{S}$   $[\text{M}+\text{H}]^+$  331.1116, found 331.1114.

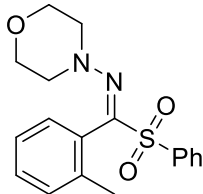

**(E)-N-Morpholino-1-(phenylsulfonyl)-1-(o-tolyl)methanimine (3c)**

The product was isolated by flash chromatography (petroleum ether/EtOAc = 3/1, v/v) as colorless oil. 71% yield.

$^1\text{H}$  NMR (400 MHz,  $\text{CDCl}_3$ ):  $\delta$  7.75–7.73 (m, 2H), 7.56 (t,  $J$  = 7.6 Hz, 1H), 7.44 (t,  $J$  = 8 Hz, 2H), 7.33–7.27 (m, 2H), 7.18 (t,  $J$  = 7.6 Hz, 1H), 7.12 (d,  $J$  = 7.6 Hz, 1H), 3.59–3.56 (m, 4H), 3.04–3.00 (m, 4H), 1.94 (s, 3H) ppm.

$^{13}\text{C}$  NMR (101 MHz,  $\text{CDCl}_3$ ):  $\delta$  141.79, 139.55, 138.91, 133.13, 130.58, 130.50, 130.32, 130.03, 129.04, 128.71, 125.93, 66.41, 53.80, 19.77 ppm.

HRMS (ESI): calcd for  $\text{C}_{18}\text{H}_{21}\text{N}_2\text{O}_3\text{S}$   $[\text{M}+\text{H}]^+$  345.1273, found 345.1270

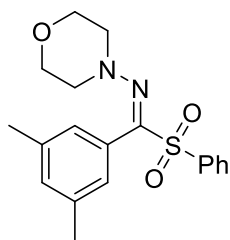

**(E)-1-(3,5-Dimethylphenyl)-N-morpholino-1-(phenylsulfonyl)methanimine (3d)**

The product was isolated by flash chromatography (petroleum ether/EtOAc = 3/1, v/v) as a white solid. 80% yield. M.p.: 142-143 °C. The *E*-configuration of the product **3d** was determined by a strong NOE signal of between *N*-methylene hydrogen (3.02 ppm, t, 4H) and an aromatic hydrogen (6.84 ppm, s, 2H).

<sup>1</sup>H NMR (600 MHz, CDCl<sub>3</sub>): δ 7.78–7.76 (m, 2H), 7.55 (t, *J* = 7.8 Hz, 1H), 7.44 (t, *J* = 7.8 Hz, 2H), 7.00 (s, 1H), 6.84 (s, 2H), 3.56 (t, *J* = 4.8 Hz, 4H), 3.02 (t, *J* = 4.8 Hz, 4H), 2.25 (s, 6H) ppm.

<sup>13</sup>C NMR (151 MHz, CDCl<sub>3</sub>): δ 143.05, 139.45, 138.28, 133.01, 131.90, 130.37, 129.01, 128.55, 127.63, 66.11, 54.10, 21.32 ppm.

HRMS (ESI): calcd for C<sub>19</sub>H<sub>23</sub>N<sub>2</sub>O<sub>3</sub>S [M+H]<sup>+</sup> 359.1429, found 359.1424.

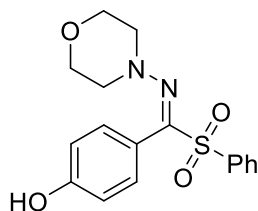

**(E)-4-((Morpholinoimino)(phenylsulfonyl)methyl)phenol (3e)**

The product was isolated by flash chromatography (petroleum ether/EtOAc = 1/1, v/v) as a white solid. 77% yield. M.p.: 119-120°C.

<sup>1</sup>H NMR (400 MHz, CDCl<sub>3</sub>): δ 7.78–7.76 (m, 2H), 7.57 (t, *J* = 7.6 Hz, 1H), 7.46 (t, *J* = 8.0 Hz, 2H), 7.15–7.12 (m, 2H), 6.77 (d, *J* = 8.8 Hz, 2H), 3.59–3.57 (m, 4H), 3.05–3.03 (m, 4H) ppm.

<sup>13</sup>C NMR (151 MHz, DMSO-*d*<sub>6</sub>): δ 158.01, 142.47, 139.11, 133.27, 131.62, 128.89, 128.79, 121.44, 116.05, 66.14, 54.05 ppm.

HRMS (ESI): calcd for C<sub>17</sub>H<sub>19</sub>N<sub>2</sub>O<sub>4</sub>S [M+H]<sup>+</sup> 347.1066, found 347.1059.

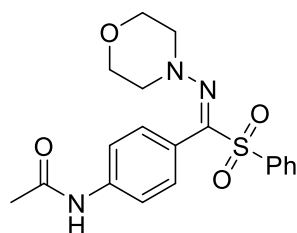

**(E)-N-(4-((Morpholinoimino)(phenylsulfonyl)methyl)phenyl)acetamide (3f)**

The product was isolated by flash chromatography (petroleum ether/EtOAc = 1/2, v/v) as a green solid. 77% yield. M.p.: 227-229 °C.

<sup>1</sup>H NMR (600 MHz, CDCl<sub>3</sub>): δ 8.09 (s, 1H), 7.78–7.77 (m, 2H), 7.59 (t, *J* = 7.2 Hz, 1H), 7.51–7.48 (m, 4H), 7.12 (dd, *J* = 8.4, 2.0 Hz, 1H), 7.17 (d, *J* = 8.4 Hz, 1H), 3.57–3.55 (m, 4H), 3.03–3.02 (m, 4H), 2.15 (s, 3H) ppm.

<sup>13</sup>C NMR (151 MHz, CDCl<sub>3</sub>): δ 169.14, 141.75, 140.17, 139.19, 133.33, 130.84, 128.84, 125.19, 119.52, 66.11, 54.12, 24.73, 14.32 ppm.

HRMS (ESI): calcd for C<sub>19</sub>H<sub>22</sub>N<sub>3</sub>O<sub>4</sub>S [M+H]<sup>+</sup> 388.1331, found 388.1340.

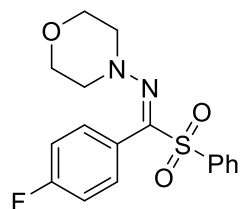

**(E)-1-(4-Fluorophenyl)-N-morpholino-1-(phenylsulfonyl)methanimine (3g)**

The product was isolated by flash chromatography (petroleum ether/EtOAc = 3/1, v/v) as yellow oil. 82% yield.

<sup>1</sup>H NMR (400 MHz, CDCl<sub>3</sub>): δ 7.75–7.73 (m, 2H), 7.57 (t, *J* = 8.0 Hz, 1H), 7.45 (t, *J* = 8.0 Hz, 2H), 7.27–7.24 (m, 2H), 7.05 (t, *J* = 8.0 Hz, 2H), 3.60–3.58 (m, 4H), 3.06–3.03 (m, 4H) ppm.

<sup>13</sup>C NMR (151 MHz, CDCl<sub>3</sub>): δ 163.61 (d, *J* = 252.0 Hz), 141.27, 139.20, 133.23, 132.22 (d, *J* = 8.5 Hz), 128.81 (d, *J* = 9.8 Hz), 126.61 (d, *J* = 3.8 Hz), 116.05 (d, *J* = 21.9 Hz), 66.05, 54.16 ppm.

<sup>19</sup>F NMR (376 MHz, CDCl<sub>3</sub>): δ -108.92 ppm.

HRMS (ESI): calcd for C<sub>17</sub>H<sub>18</sub>FN<sub>2</sub>O<sub>3</sub>S [M+H]<sup>+</sup> 349.1022, found 349.1020.

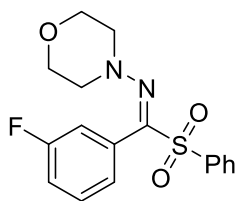

**(E)-1-(3-Fluorophenyl)-N-morpholino-1-(phenylsulfonyl)methanimine (3h)**

The product was isolated by flash chromatography (petroleum ether/EtOAc = 3/1, v/v) as colorless oil. 77% yield.

$^1\text{H}$  NMR (600 MHz,  $\text{CDCl}_3$ ):  $\delta$  7.80–7.78 (m, 2H), 7.62–7.59 (m, 1H), 7.50–7.47 (m, 2H), 7.37–7.33 (m, 1H), 7.15–7.13 (m, 1H), 7.07–7.06 (m, 1H), 7.03–7.01 (m, 1H), 3.63–3.61 (m, 4H), 3.10–3.08 (m, 4H) ppm.

$^{13}\text{C}$  NMR (151 MHz,  $\text{CDCl}_3$ ):  $\delta$  162.37 (d,  $J = 249.9$  Hz), 140.33, 139.26, 133.30, 132.73 (d,  $J = 7.8$  Hz), 130.37 (d,  $J = 8.3$  Hz), 128.84 (d,  $J = 4.9$  Hz), 126.11 (d,  $J = 3.2$  Hz), 117.42 (dd,  $J = 20.8$  Hz), 117.38, 117.23, 66.07, 54.19 ppm.

$^{19}\text{F}$  NMR (565 MHz,  $\text{CDCl}_3$ ):  $\delta$  -110.97 ppm.

HRMS (ESI): calcd for  $\text{C}_{17}\text{H}_{18}\text{FN}_2\text{O}_3\text{S}$   $[\text{M}+\text{H}]^+$  349.1022, found 349.1020.

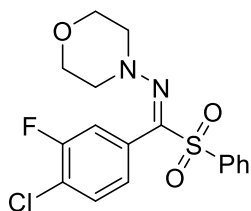

**(E)-1-(4-Chloro-3-fluorophenyl)-N-morpholino-1-(phenylsulfonyl)methanimine (3i)**

The product was isolated by flash chromatography (petroleum ether/EtOAc = 3/1, v/v) as yellow oil. 71% yield.

$^1\text{H}$  NMR (400 MHz,  $\text{CDCl}_3$ ):  $\delta$  7.77–7.75 (m, 2H), 7.59 (t,  $J = 7.6$  Hz, 1H), 7.47 (t,  $J = 8.0$  Hz, 2H), 7.39 (t,  $J = 8.0$  Hz, 1H), 7.10 (dd,  $J = 8.8, 1.6$  Hz, 1H), 7.00 (dd,  $J = 8.4, 1.2$  Hz, 1H), 3.62–3.60 (m, 4H), 3.08–3.06 (m, 4H) ppm.

$^{13}\text{C}$  NMR (151 MHz,  $\text{CDCl}_3$ ):  $\delta$  157.83 (d,  $J = 252.8$  Hz), 139.22, 139.12, 133.44, 131.05, 130.97 (d,  $J = 6.8$  Hz), 128.88 (d,  $J = 14.8$  Hz), 126.83 (d,  $J = 3.9$  Hz), 123.57 (d,  $J = 17.2$  Hz), 118.56, 118.41, 66.06, 54.24 ppm.

$^{19}\text{F}$  NMR (377 MHz,  $\text{CDCl}_3$ ):  $\delta$  -112.83 ppm.

HRMS (ESI): calcd for C<sub>17</sub>H<sub>17</sub>ClFN<sub>2</sub>O<sub>3</sub>S [M+H]<sup>+</sup> 383.0632, found 383.0626.

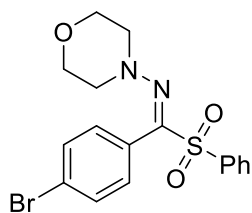

**(E)-1-(4-Bromophenyl)-N-morpholino-1-(phenylsulfonyl)methanimine (3j)**

The product was isolated by flash chromatography (petroleum ether/EtOAc = 3/1, v/v) as colorless oil. 57% yield.

<sup>1</sup>H NMR (400 MHz, CDCl<sub>3</sub>): δ 7.81–7.78 (m, 3H), 7.57 (t, *J* = 7.6 Hz, 1H), 7.47–7.43 (m, 2H), 7.41–7.37 (m, 2H), 7.12–7.08 (m, 1H), 3.66–3.62 (m, 4H), 3.22–3.07 (m, 4H) ppm.

<sup>13</sup>C NMR (151 MHz, CDCl<sub>3</sub>): δ 140.79, 139.21, 133.27, 132.02, 131.68, 129.66, 128.83, 124.87, 66.06, 54.20 ppm.

HRMS (ESI): calcd for C<sub>17</sub>H<sub>17</sub>BrNaN<sub>2</sub>O<sub>3</sub>S [M+Na]<sup>+</sup> 431.0041 found 431.0018.

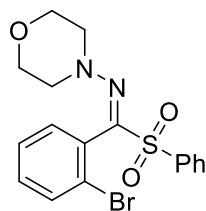

**(E)-1-(2-Bromophenyl)-N-morpholino-1-(phenylsulfonyl)methanimine (3k)**

The product was isolated by flash chromatography (petroleum ether/EtOAc = 3/1, v/v) as yellow oil. 50% yield.

<sup>1</sup>H NMR (400 MHz, CDCl<sub>3</sub>): δ 7.79–7.77 (m, 2H), 7.56 (t, *J* = 7.2 Hz, 1H), 7.51 (dd, *J* = 8.0, 0.8 Hz, 1H), 7.48–7.42 (m, 3H), 7.38–7.35 (m, 1H), 7.29 (dd, *J* = 7.6, 1.6 Hz, 1H), 3.64–3.62 (m, 4H), 3.22–3.07 (m, 4H) ppm.

<sup>13</sup>C NMR (101 MHz, CDCl<sub>3</sub>): δ 139.87, 137.16, 133.13, 132.88, 132.78, 132.70, 131.67, 129.10, 128.70, 127.42, 125.28, 66.54, 53.47 ppm.

HRMS (ESI): calcd for C<sub>17</sub>H<sub>17</sub>BrNaN<sub>2</sub>O<sub>3</sub>S [M+Na]<sup>+</sup> 431.0041 found 431.0025.



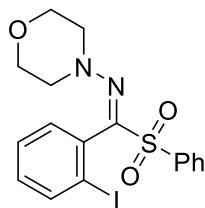

**(E)-1-(2-Iodophenyl)-N-morpholino-1-(phenylsulfonyl)methanimine (3l)**

The product was isolated by flash chromatography (petroleum ether/EtOAc = 3/1, v/v) as a white solid. 51% yield. M.p.: 132-133 °C.

<sup>1</sup>H NMR (600 MHz, CDCl<sub>3</sub>): δ 7.75–7.73 (m, 2H), 7.58–7.55 (m, 1H), 7.49–7.47 (m, 2H), 7.46–7.44 (m, 2H), 7.13–7.12 (m, 2H), 3.59–3.57 (m, 4H), 3.06–3.04 (m, 4H) ppm.

<sup>13</sup>C NMR (101 MHz, CDCl<sub>3</sub>): δ 140.89, 139.26, 133.28, 132.04, 131.69, 129.69, 128.86, 128.83, 124.89, 66.08, 54.22 ppm.

HRMS (ESI): calcd for C<sub>17</sub>H<sub>18</sub>IN<sub>2</sub>O<sub>3</sub>S [M+H]<sup>+</sup> 457.0083, found 457.0051.

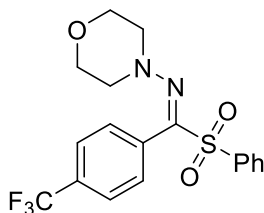

**(E)-N-Morpholino-1-(phenylsulfonyl)-1-(4-(trifluoromethyl)phenyl)methanimine (3m)**

The product was isolated by flash chromatography (petroleum ether/EtOAc = 2/1, v/v) as white solid. 65% yield. M.p.: 117-118 °C.

<sup>1</sup>H NMR (600 MHz, CDCl<sub>3</sub>): δ 7.76–7.74 (m, 2H), 7.61 (d, *J* = 7.8 Hz, 2H), 7.58 (t, *J* = 7.2 Hz, 1H), 7.46 (t, *J* = 7.8 Hz, 2H), 7.39 (d, *J* = 7.8 Hz, 2H), 3.61–3.58 (m, 4H), 3.07–3.04 (m, 4H) ppm.

<sup>13</sup>C NMR (151 MHz, CDCl<sub>3</sub>): δ 139.98, 139.14, 134.75, 133.40, 132.07 (q, *J* = 32.9 Hz), 130.69, 128.89, 128.83, 125.62 (q, *J* = 3.8 Hz), 123.65 (q, *J* = 272.7 Hz), 66.03, 54.26 ppm.

<sup>19</sup>F NMR (377 MHz, CDCl<sub>3</sub>): δ -62.95 ppm.

HRMS (ESI): calcd for C<sub>18</sub>H<sub>18</sub>F<sub>3</sub>N<sub>2</sub>O<sub>3</sub>S [M+H]<sup>+</sup> 399.0990, found 399.0986.

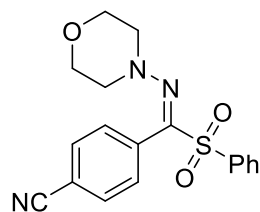

**(E)-4-((Morpholinoimino)(phenylsulfonyl)methyl)benzonitrile (3n)**

The product was isolated by flash chromatography (petroleum ether/EtOAc = 1/2, v/v) as a white solid. 75% yield. M.p.: 128-130°C.

<sup>1</sup>H NMR (400 MHz, CDCl<sub>3</sub>): δ 7.76–7.73 (m, 2H), 7.67–7.64 (m, 2H), 7.62–7.58 (m, 1H), 7.49–7.45 (m, 2H), 7.41–7.39 (m, 2H), 3.61–3.59 (m, 4H), 3.06–3.04 (m, 4H) ppm.

<sup>13</sup>C NMR (101 MHz, CDCl<sub>3</sub>): δ 139.29, 139.09, 135.87, 133.53, 132.31, 131.04, 129.00, 128.83, 117.97, 114.08, 66.02, 54.36 ppm.

HRMS (ESI): calcd for C<sub>18</sub>H<sub>18</sub>N<sub>3</sub>O<sub>3</sub>S [M+H]<sup>+</sup> 356.1069, found 356.1062.

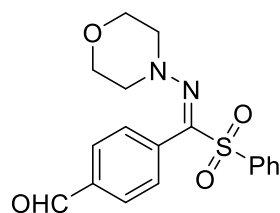

**(E)-4-((Morpholinoimino)(phenylsulfonyl)methyl)benzaldehyde (3o)**

The product was isolated by flash chromatography (petroleum ether/EtOAc = 2/1, v/v) as a white solid. 65% yield. M.p.: 121-123°C.

<sup>1</sup>H NMR (400 MHz, CDCl<sub>3</sub>): δ 10.03 (s, 1H), 7.86 (d, *J* = 8.4 Hz, 2H), 7.76–7.74 (m, 2H), 7.58 (t, *J* = 7.6 Hz, 1H), 7.46 (t, *J* = 7.6 Hz, 4H), 3.60–3.58 (m, 1H), 3.07–3.05 (m, 4H) ppm.

<sup>13</sup>C NMR (101 MHz, CDCl<sub>3</sub>): δ 191.46, 140.19, 139.25, 137.13, 137.09, 133.42, 131.00, 129.68, 128.92, 128.85, 66.06, 54.34 ppm.

HRMS (ESI): calcd for C<sub>18</sub>H<sub>19</sub>N<sub>2</sub>O<sub>4</sub>S [M+H]<sup>+</sup> 359.1066, found 359.1060.

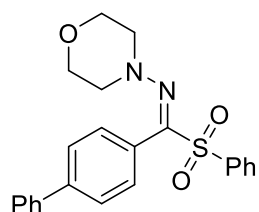

**(E)-1-([1,1'-Biphenyl]-4-yl)-N-morpholino-1-(phenylsulfonyl)methanimine (3p)**

The product was isolated by flash chromatography (petroleum ether/EtOAc = 3/1, v/v) as a white solid. 73% yield. M.p.: 161-163 °C.

<sup>1</sup>H NMR (600 MHz, CDCl<sub>3</sub>): δ 7.80 (dd, *J* = 8.4, 1.2 Hz, 2H), 7.61–7.56 (m, 5H), 7.46 (t, *J* = 7.6 Hz, 4H), 7.40–7.37 (m, 1H), 7.35–7.33 (m, 2H), 3.61–3.59 (m, 4H), 3.10–3.09 (m, 4H) ppm.

<sup>13</sup>C NMR (151 MHz, CDCl<sub>3</sub>): δ 142.83, 142.19, 139.77, 139.44, 133.13, 130.51, 129.41, 129.04, 128.90, 128.72, 128.15, 127.23, 127.16, 66.10, 54.19 ppm.

HRMS (ESI): calcd for C<sub>23</sub>H<sub>23</sub>N<sub>2</sub>O<sub>3</sub>S [M+H]<sup>+</sup> 407.1429, found 407.1436.

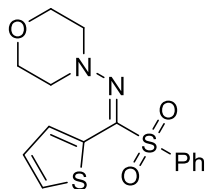

**(E)-N-Morpholino-1-(phenylsulfonyl)-1-(thiophen-2-yl)methanimine (3q)**

The product was isolated by flash chromatography (petroleum ether/EtOAc = 3/1, v/v) as a yellow solid. 82% yield. M.p.: 138-139 °C.

<sup>1</sup>H NMR (400 MHz, CDCl<sub>3</sub>): δ 7.99–7.97 (m, 2H), 7.59–7.55 (m, 3H), 7.52–7.48 (m, 2H), 6.93 (d, *J* = 3.9 Hz, 1H), 3.85 (m, 4H), 3.19–3.13 (m, 4H) ppm.

<sup>13</sup>C NMR (101 MHz, CDCl<sub>3</sub>): δ 150.89, 142.27, 140.64, 133.63, 133.33, 129.41, 127.76, 127.46, 124.98, 66.30, 51.39 ppm.

HRMS (ESI): calcd for C<sub>15</sub>H<sub>17</sub>N<sub>2</sub>O<sub>3</sub>S<sub>2</sub> [M+H]<sup>+</sup> 337.0681, found 337.0677.

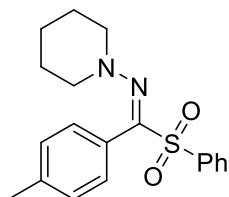

**(E)-1-(Phenylsulfonyl)-N-(piperidin-1-yl)-1-(p-tolyl)methanimine (3r)**

The product was isolated by flash chromatography (petroleum ether/EtOAc = 10/1, v/v) as yellow oil. 73% yield.

<sup>1</sup>H NMR (600 MHz, CDCl<sub>3</sub>): δ 7.75 (dd, *J* = 8.4, 1.2 Hz, 2H), 7.52 (t, *J* = 7.2 Hz, 1H), 7.42 (t, *J* = 7.2 Hz, 2H), 7.13–7.09 (m, 4H), 3.07–3.05 (m, 4H), 2.35 (s, 3H), 1.46–1.44 (m, 6H) ppm.

$^{13}\text{C}$  NMR (151 MHz,  $\text{CDCl}_3$ ):  $\delta$  140.4, 139.9, 138.6, 132.7, 130.1, 129.3, 128.7, 128.6, 128.4, 54.8, 25.1, 23.8, 21.6 ppm.

HRMS (ESI): calcd for  $\text{C}_{19}\text{H}_{23}\text{N}_2\text{O}_2\text{S}$   $[\text{M}+\text{H}]^+$  343.1480, found 343.1471.

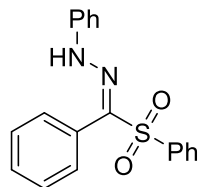

**(E)-1-Phenyl-2-(phenyl(phenylsulfonyl)methylene)hydrazine (3s)**

The product was isolated by flash chromatography (petroleum ether/EtOAc = 3/1, v/v) as yellow oil. 84% yield.

$^1\text{H}$  NMR (600 MHz,  $\text{CDCl}_3$ ):  $\delta$  7.93 (d,  $J = 7.8$  Hz, 2H), 7.89 (s, 1H), 7.66 (t,  $J = 7.8$  Hz, 1H), 7.57–7.54 (m, 5H), 7.37–7.36 (m, 2H), 7.24 (t,  $J = 7.8$  Hz, 2H), 6.97 (t,  $J = 7.8$  Hz, 1H), 6.93 (d,  $J = 7.8$  Hz, 2H) ppm.

$^{13}\text{C}$  NMR (151 MHz,  $\text{CDCl}_3$ ):  $\delta$  142.6, 142.3, 139.2, 133.5, 131.1, 123.0, 129.9, 129.4, 129.1, 129.0, 126.2, 122.6, 113.9 ppm.

HRMS (ESI): calcd for  $\text{C}_{19}\text{H}_{17}\text{N}_2\text{O}_2\text{S}$   $[\text{M}+\text{H}]^+$  337.1011, found 337.1013.

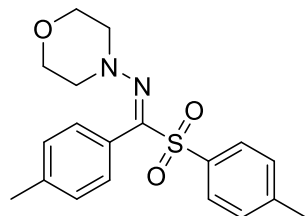

**(E)-N-Morpholino-1-(p-tolyl)-1-tosylmethanimine (4a)<sup>1</sup>**

The product was isolated by flash chromatography (petroleum ether/EtOAc = 3/1, v/v) as a white solid. 85% yield. M.p.: 124–126 °C.

$^1\text{H}$  NMR (600 MHz,  $\text{CDCl}_3$ ):  $\delta$  7.62 (d,  $J = 8.2$  Hz, 2H), 7.22 (d,  $J = 8.1$  Hz, 2H), 7.15–7.12 (m, 4H), 3.59–3.55 (m, 4H), 3.05–3.02 (m, 4H), 2.40 (s, 3H), 2.35 (s, 3H) ppm.

$^{13}\text{C}$  NMR (101 MHz,  $\text{CDCl}_3$ ):  $\delta$  143.89, 143.23, 140.38, 136.52, 129.89, 129.41, 129.34, 128.91, 127.68, 66.16, 54.13, 21.76, 21.64 ppm.

HRMS (ESI): calcd for  $\text{C}_{19}\text{H}_{23}\text{N}_2\text{O}_3\text{S}$   $[\text{M}+\text{H}]^+$  359.1429, found 359.1424.

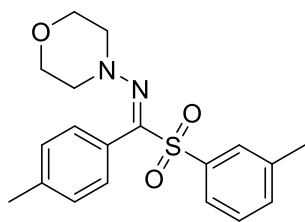

**(E)-N-Morpholino-1-(p-tolyl)-1-(m-tolylsulfonyl)methanimine (4b)**

The product was isolated by flash chromatography (petroleum ether/EtOAc = 3/1, v/v) as yellow oil. 80% yield.

$^1\text{H}$  NMR (400 MHz,  $\text{CDCl}_3$ ):  $\delta$  7.56–7.51 (m, 2H), 7.35–7.28 (m, 2H), 7.13 (s, 4H), 3.58–3.56 (m, 4H), 3.05–3.03 (m, 4H), 2.35 (d,  $J = 2.8$  Hz, 6H) ppm.

$^{13}\text{C}$  NMR (101 MHz,  $\text{CDCl}_3$ ):  $\delta$  142.99, 140.40, 139.30, 138.77, 133.82, 129.94, 129.38, 129.15, 128.50, 127.66, 126.09, 66.13, 54.13, 21.59, 21.34 ppm.

HRMS (ESI): calcd for  $\text{C}_{19}\text{H}_{23}\text{N}_2\text{O}_3\text{S}$   $[\text{M}+\text{H}]^+$  359.1429, found 359.1424.

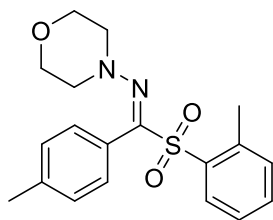

**(E)-N-Morpholino-1-(p-tolyl)-1-(o-tolylsulfonyl)methanimine (4c)**

The product was isolated by flash chromatography (petroleum ether/EtOAc = 3/1, v/v) as a white solid. 75% yield. M.p.: 101–103 °C.

$^1\text{H}$  NMR (400 MHz,  $\text{CDCl}_3$ ):  $\delta$  7.81 (dd,  $J = 7.9, 1.2$  Hz, 1H), 7.42 (td,  $J = 7.5, 1.3$  Hz, 1H), 7.26–7.18 (m, 4H), 7.13 (d,  $J = 8.0$  Hz, 2H), 3.59–3.56 (m, 4H), 3.02–2.99 (m, 4H), 2.64 (s, 3H), 2.34 (s, 3H) ppm.

$^{13}\text{C}$  NMR (101 MHz,  $\text{CDCl}_3$ ):  $\delta$  143.27, 140.54, 139.00, 137.26, 133.20, 132.03, 130.81, 129.71, 129.46, 127.18, 126.03, 66.15, 54.16, 21.63, 20.87 ppm.

HRMS (ESI): calcd for  $\text{C}_{19}\text{H}_{23}\text{N}_2\text{O}_3\text{S}$   $[\text{M}+\text{H}]^+$  359.1429, found 359.1424.

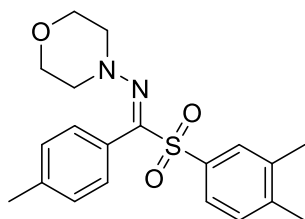

**(E)-1-((3,4-Dimethylphenyl)sulfonyl)-N-morpholino-1-(p-tolyl)methanimine (4d)**

The product was isolated by flash chromatography (petroleum ether/EtOAc = 3/1, v/v) as a white solid. 73% yield. M.p.: 111-113 °C.

<sup>1</sup>H NMR (400 MHz, CDCl<sub>3</sub>): δ 7.51 (s, 1H), 7.44 (dd, *J* = 7.9, 1.8 Hz, 1H), 7.17 (d, *J* = 8.0 Hz, 1H), 7.14 (s, 4H), 3.59–3.57 (m, 4H), 3.05–3.03 (m, 4H), 2.36 (s, 3H), 2.30 (s, 3H), 2.26 (s, 3H) ppm.

<sup>13</sup>C NMR (101 MHz, CDCl<sub>3</sub>): δ 143.48, 142.62, 140.36, 137.38, 136.67, 129.95, 129.86, 129.62, 129.39, 127.83, 126.56, 66.20, 54.17, 21.64, 20.15, 19.83 ppm.

HRMS (ESI): calcd for C<sub>20</sub>H<sub>25</sub>N<sub>2</sub>O<sub>3</sub>S [M+H]<sup>+</sup> 373.1586, found 373.1583.

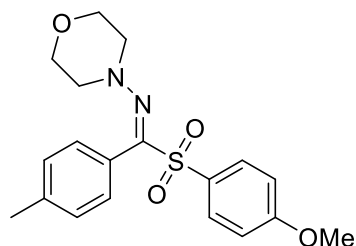

**(E)-1-((4-Methoxyphenyl)sulfonyl)-N-morpholino-1-(p-tolyl)methanimine (4e)<sup>1</sup>**

The product was isolated by flash chromatography (petroleum ether/EtOAc = 3/1, v/v) as a yellow semisolid. 73% yield.

<sup>1</sup>H NMR (400 MHz, CDCl<sub>3</sub>): δ 7.68–7.64 (m, 2H), 7.14 (s, 4H), 6.91–6.88 (m, 2H), 3.85 (s, 3H), 3.58–3.56 (m, 4H), 3.03–3.01 (m, 4H), 2.35 (s, 3H) ppm.

<sup>13</sup>C NMR (101 MHz, CDCl<sub>3</sub>): δ 163.37, 143.73, 140.37, 131.08, 130.94, 129.88, 129.42, 127.75, 113.92, 66.17, 55.70, 54.16, 21.63 ppm.

HRMS (ESI): calcd for C<sub>19</sub>H<sub>23</sub>N<sub>2</sub>O<sub>4</sub>S [M+H]<sup>+</sup> 375.1379, found 375.1371.

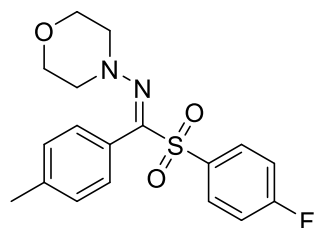

**(E)-1-((4-Fluorophenyl)sulfonyl)-N-morpholino-1-(p-tolyl)methanimine (4f)**

The product was isolated by flash chromatography (petroleum ether/EtOAc = 3/1, v/v) as colorless oil. 79% yield.

<sup>1</sup>H NMR (600 MHz, CDCl<sub>3</sub>): δ 7.76–7.74 (m, 2H), 7.16–7.09 (m, 6H), 3.58–3.56 (m, 4H), 3.04–3.02 (m, 4H), 2.35 (s, 3H) ppm.

<sup>13</sup>C NMR (101 MHz, CDCl<sub>3</sub>): δ 165.55 (d, *J* = 255.8 Hz), 142.55, 140.63, 135.50,

131.65 (d,  $J = 9.5$  Hz), 129.93, 129.51, 127.36, 115.94 (d,  $J = 22.6$  Hz), 66.11, 54.12, 21.62 ppm.

$^{19}\text{F}$  NMR (377 MHz,  $\text{CDCl}_3$ ):  $\delta$  -104.86 ppm.

HRMS (ESI): calcd for  $\text{C}_{18}\text{H}_{20}\text{FN}_2\text{O}_3\text{S}$   $[\text{M}+\text{H}]^+$  363.1179, found 363.1175.

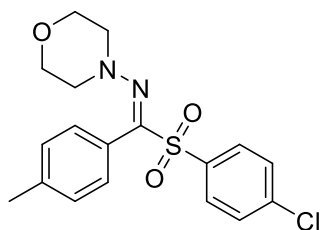

**(E)-1-((4-Chlorophenyl)sulfonyl)-N-morpholino-1-(p-tolyl)methanimine (4g)<sup>1</sup>**

The product was isolated by flash chromatography (petroleum ether/EtOAc = 3/1, v/v) as a white solid. 81% yield. M.p.: 130-132 °C

$^1\text{H}$  NMR (400 MHz,  $\text{CDCl}_3$ ):  $\delta$  7.70–7.67 (m, 2H), 7.42–7.40 (m, 2H), 7.18–7.13 (m, 4H), 3.59–3.57 (m, 4H), 3.06–3.02 (m, 4H), 2.37 (s, 3H) ppm.

$^{13}\text{C}$  NMR (101 MHz,  $\text{CDCl}_3$ ):  $\delta$  142.19, 140.70, 139.70, 138.15, 130.35, 129.98, 129.56, 129.01, 127.33, 66.13, 54.14, 21.65 ppm.

HRMS (ESI): calcd for  $\text{C}_{18}\text{H}_{20}\text{ClN}_2\text{O}_3\text{S}$   $[\text{M}+\text{H}]^+$  379.0883, found 379.0876.

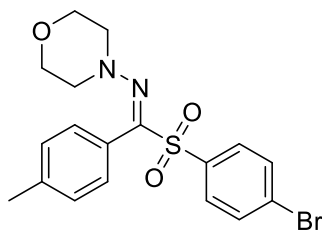

**(E)-1-((4-Bromophenyl)sulfonyl)-N-morpholino-1-(p-tolyl)methanimine (4h)<sup>1</sup>**

The product was isolated by flash chromatography (petroleum ether/EtOAc = 3/1, v/v) as a white solid. 75% yield. M.p.: 143-145 °C

$^1\text{H}$  NMR (400 MHz,  $\text{CDCl}_3$ ):  $\delta$  7.63–7.56 (m, 4H), 7.18–7.13 (m, 4H), 3.59–3.57 (m, 4H), 3.06–3.03 (m, 4H), 2.36 (s, 3H) ppm.

$^{13}\text{C}$  NMR (101 MHz,  $\text{CDCl}_3$ ):  $\delta$  142.09, 140.70, 138.73, 131.99, 130.43, 129.98, 129.56, 128.28, 127.32, 66.13, 54.14, 21.64 ppm.

HRMS (ESI): calcd for  $\text{C}_{18}\text{H}_{20}\text{BrN}_2\text{O}_3\text{S}$   $[\text{M}+\text{H}]^+$  423.0378, found 423.0374.

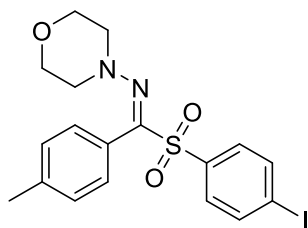

**(E)-1-((4-Iodophenyl)sulfonyl)-N-morpholino-1-(p-tolyl)methanimine (4i)**

The product was isolated by flash chromatography (petroleum ether/EtOAc = 3/1, v/v) as a white solid. 79% yield. M.p.: 142-144 °C

<sup>1</sup>H NMR (400 MHz, CDCl<sub>3</sub>): δ 7.81–7.79 (m, 2H), 7.47–7.45 (m, 2H), 7.18–7.12 (m, 4H), 3.59–3.57 (m, 4H), 3.06–3.04 (m, 4H), 2.37 (s, 3H) ppm.

<sup>13</sup>C NMR (101 MHz, CDCl<sub>3</sub>): δ 142.07, 140.70, 139.46, 137.97, 130.29, 130.00, 129.56, 127.35, 100.87, 66.15, 54.15, 21.66 ppm.

HRMS (ESI): calcd for C<sub>18</sub>H<sub>20</sub>IN<sub>2</sub>O<sub>3</sub>S [M+H]<sup>+</sup> 471.0239, found 471.0236.

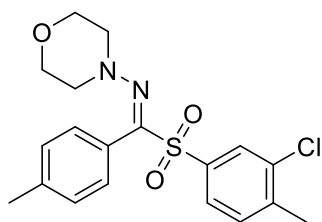

**(E)-1-((3-Chloro-4-methylphenyl)sulfonyl)-N-morpholino-1-(p-tolyl)methanimine (4j)**

The product was isolated by flash chromatography (petroleum ether/EtOAc = 3/1, v/v) as a white solid. 72% yield. M.p.: 120-122 °C

<sup>1</sup>H NMR (600 MHz, CDCl<sub>3</sub>): δ 7.74 (s, 1H), 7.50 (dd, *J* = 7.8, 1.2 Hz, 1H), 7.29 (d, *J* = 8.4 Hz, 1H), 7.15 (q, *J* = 8.2 Hz, 4H), 3.59–3.58 (m, 4H), 3.06–3.05 (m, 4H), 2.42 (s, 3H), 2.37 (s, 3H) ppm.

<sup>13</sup>C NMR (151 MHz, CDCl<sub>3</sub>): δ 142.21, 141.88, 140.65, 138.53, 134.88, 131.06, 129.98, 129.52, 129.32, 127.38, 127.03, 66.15, 54.13, 21.65, 20.53 ppm.

HRMS (ESI): calcd for C<sub>19</sub>H<sub>22</sub>ClN<sub>2</sub>O<sub>3</sub>S [M+H]<sup>+</sup> 393.1040, found 393.1036.



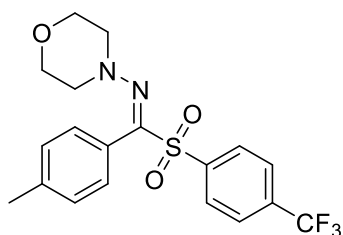

**(E)-N-Morpholino-1-(p-tolyl)-1-((4-(trifluoromethyl)phenyl)sulfonyl)methanimine (4k)<sup>1</sup>**

The product was isolated by flash chromatography (petroleum ether/EtOAc = 3/1, v/v) as a red solid. 53% yield. M.p.: 141-142 °C

<sup>1</sup>H NMR (400 MHz, CDCl<sub>3</sub>): δ 7.90 (d, *J* = 8.0 Hz, 2H), 7.74 (d, *J* = 8.4 Hz, 2H), 7.19–7.13 (m, 4H), 3.60–3.57 (m, 4H), 3.07–3.05 (m, 4H), 2.37 (s, 3H) ppm.

<sup>13</sup>C NMR (101 MHz, CDCl<sub>3</sub>): δ 143.42, 141.37, 140.86, 134.63 (q, *J* = 33.1 Hz), 130.03, 129.62, 129.40, 127.14, 125.80 (q, *J* = 3.6 Hz), 123.43 (q, *J* = 274.0 Hz), 66.11, 54.12, 21.64 ppm.

<sup>19</sup>F NMR (377 MHz, CDCl<sub>3</sub>): δ -63.03 ppm.

HRMS (ESI): calcd for C<sub>19</sub>H<sub>20</sub>F<sub>3</sub>N<sub>2</sub>O<sub>3</sub>S [M+H]<sup>+</sup> 413.1147, found 413.1143.

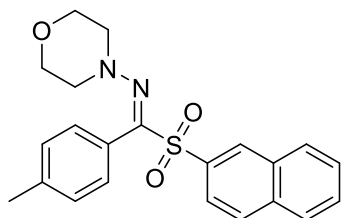

**(E)-N-Morpholino-1-(naphthalen-2-ylsulfonyl)-1-(p-tolyl)methanimine (4l)**

The product was isolated by flash chromatography (petroleum ether/EtOAc = 3/1, v/v) as a white solid. 70% yield. M.p.: 130-132 °C

<sup>1</sup>H NMR (400 MHz, CDCl<sub>3</sub>): δ 8.33 (s, 1H), 7.92–7.88 (m, 3H), 7.75 (dd, *J* = 8.4, 1.6 Hz, 1H), 7.66–7.63 (m, 1H), 7.60–7.56 (m, 1H), 7.17–7.12 (m, 4H), 3.58–3.55 (m, 4H), 3.05–3.03 (m, 4H), 2.35 (s, 3H) ppm.

<sup>13</sup>C NMR (101 MHz, CDCl<sub>3</sub>): δ 142.85, 140.53, 136.68, 135.13, 132.18, 130.32, 129.99, 129.53, 139.49, 128.99, 128.74, 128.00, 127.64, 127.39, 124.11, 66.16, 54.16, 21.65 ppm.

HRMS (ESI): calcd for C<sub>22</sub>H<sub>23</sub>N<sub>2</sub>O<sub>3</sub>S [M+H]<sup>+</sup> 395.1429, found 395.1423.

**III. General procedure for the sulfonylation of hydrazones with sulfonyl**

## chlorides

Hydrazone **1a** (0.2 mmol, 1.0 equiv), arylsulfonyl chloride **5** (0.4 mmol, 2.0 equiv), [Ir{dFCF<sub>3</sub>ppy}<sub>2</sub>(bpy)]PF<sub>6</sub> (2 mol%), Na<sub>2</sub>CO<sub>3</sub> (0.4 mmol, 2.0 equiv) were added to a 10-mL Schlenk tube. The tube was evacuated and backfilled with N<sub>2</sub> three times before MeCN (2 mL) was added. The reaction mixture was stirred at 25 °C for 24 h under 25 W blue LED. The solvent was evaporated under reduced pressure. The residue was purified directly by flash chromatograph (petroleum ether/EtOAc) to give the corresponding product.

## IV. Gram scale procedure for the synthesis of **3a**

To a screw-cap reaction tube (50 mL) were added (*E*)-*N*-morpholino-1-(*p*-tolyl)methanimine **1a** (1.0 g, 4.9 mmol, 1.0 equiv), **2a** (1.9 g, 9.8 mmol, 2.0 equiv), DABSO (2.4 g, 9.8 mmol, 2.0 equiv), FeCl<sub>3</sub> (0.4 g, 2.45 mmol, 50 mol%), quinoline (0.3 g, 2.45 mmol, 50 mol%). The tube was evacuated and backfilled with N<sub>2</sub> three times before MeCN (30 mL) was added. The reaction mixture was stirred at 25 °C for 24 h. When the reaction was complete (monitor by TLC), the mixture was filtered through a Celite pad, and the Celite pad was washed with dichloromethane. The combined filtrate was concentrated and the residue was purified by column chromatography on silica gel to provide the desired product **3a** with a yield of 70% (1.18 g).

## V. Procedure for radical capture experiment with 1,1-diphenylethylene

**1a** (0.2 mmol, 1.0 equiv), aryldiazonium tetrafluoroborate **2** (0.4 mmol, 2.0 equiv), DABSO (0.4 mmol, 2.0 equiv), FeCl<sub>3</sub> (0.1 mmol, 50 mol%), quinoline (0.1 mmol, 50 mol%), and 1,1-diphenylethylene (0.4 mmol, 2.0 equiv) were added to a 10-mL Schlenk tube. The tube was evacuated and backfilled with N<sub>2</sub> three times before MeCN (2 mL) was added. The reaction mixture was stirred at 25 °C for 24 h. The solvent was evaporated under reduced pressure. The residue was purified directly by flash chromatograph (petroleum ether/EtOAc = 3/1, v/v) to give (2-(phenylsulfonyl)ethene-1,1-diyl)dibenzene **6** as colorless oil in 48% yield. <sup>1</sup>H NMR (400 MHz, CDCl<sub>3</sub>): δ 7.59–7.56 (m, 2H), 7.51–7.46 (m, 1H), 7.40–7.34 (m, 4H), 7.33–7.26 (m, 4H), 7.23–7.20 (m, 2H), 7.09–7.06 (m, 2H), 7.03 (s, 1H) ppm. <sup>13</sup>C

NMR (101 MHz, CDCl<sub>3</sub>):  $\delta$  155.4, 141.6, 139.2, 135.6, 133.0, 130.5, 129.9, 129.0, 128.9, 128.8, 128.7, 128.4, 128.0, 127.8 ppm. HRMS (ESI): calcd for C<sub>20</sub>H<sub>17</sub>O<sub>2</sub>S [M+H]<sup>+</sup> 321.0949, found 321.0940.

## VI. References

- (1) S. Biswajit, G. Payel and H. Alakananda, Electrochemical C–H Sulfonylation of Hydrazones, *Org. Lett.*, 2023, **25**, 3440-3444.
- (2) (a) R. Mao, Z. Yuan, R. Zhang, Y. Ding, X. Fan and J. Wu, A copper(ii)-catalyzed three-component reaction of aryldiazonium tetrafluoroborates, sulfur dioxide, with alkenes, *Org. Chem. Front.*, 2016, **3**, 1498-1502; (b) H. Wang, S. Sun and J. Cheng, Copper-Catalyzed Arylsulfonylation and Cyclizative Carbonation of *N*-(Arylsulfonyl)acrylamides Involving Desulfonative Arrangement toward Sulfonated Oxindoles, *Org. Lett.*, 2017, **19**, 5844-5847.
- (3) Q.-L. Yang, P.-P. Lei, E.-J. Hao, B.-N. Zhang, H.-H. Zhou, W.-W. Li and H.-M. Guo, Oxidative C–H Sulfonylation of Hydrazones Enabled by Electrochemistry, *SynOpen*, 2023, **7**, 535-547.

## VII. Copies of NMR spectra

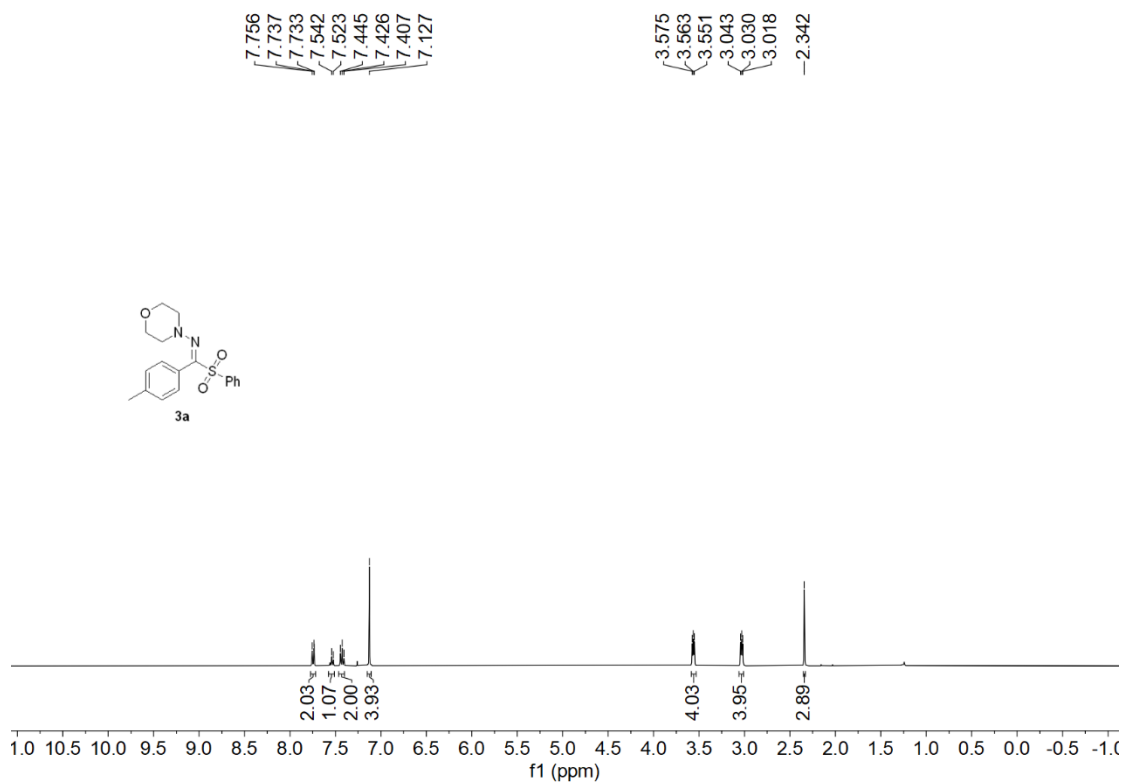

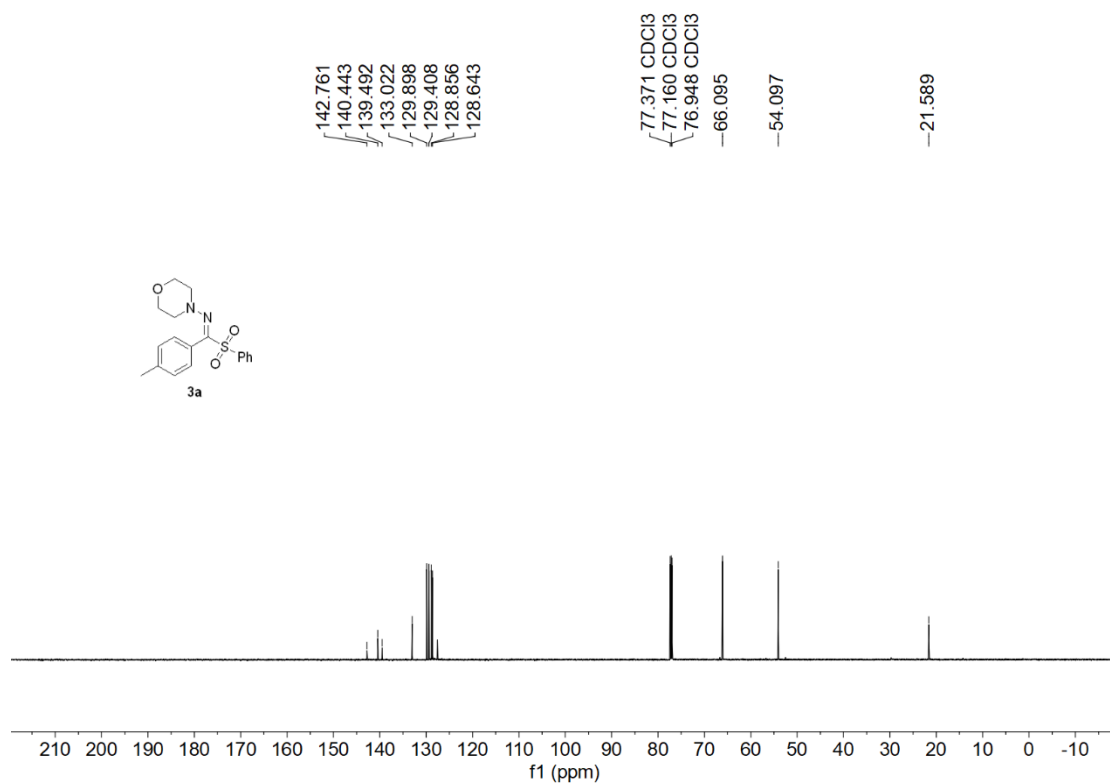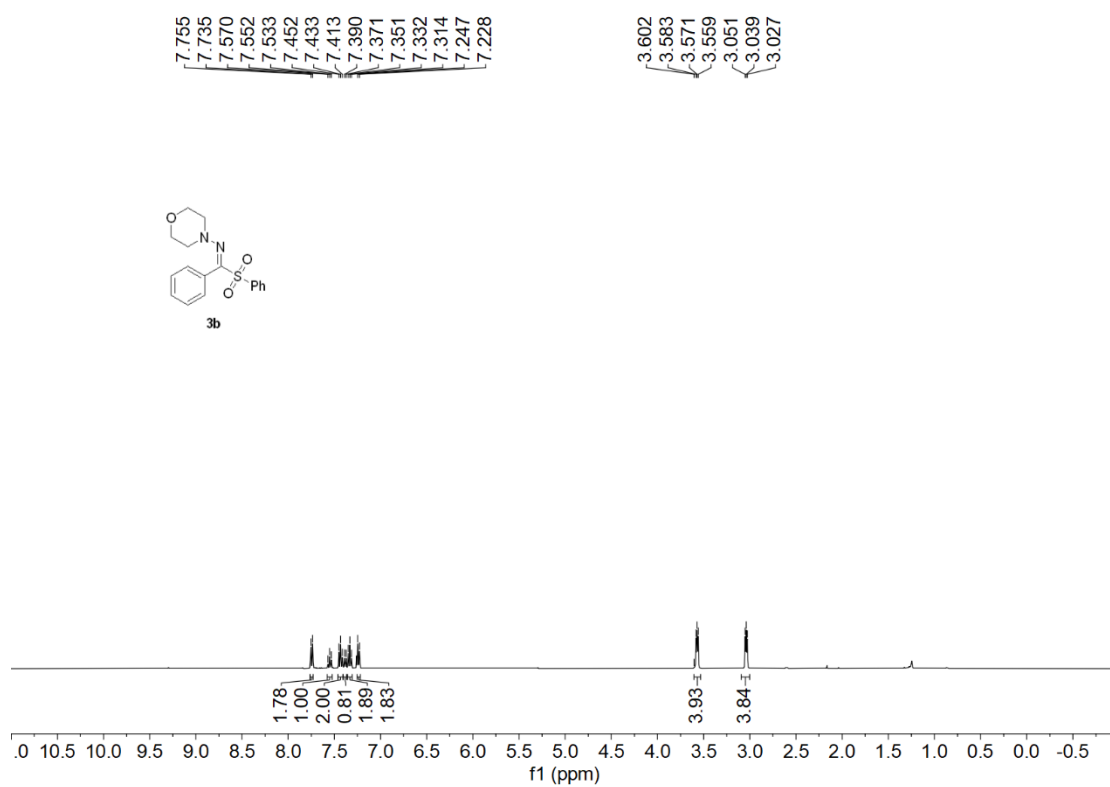

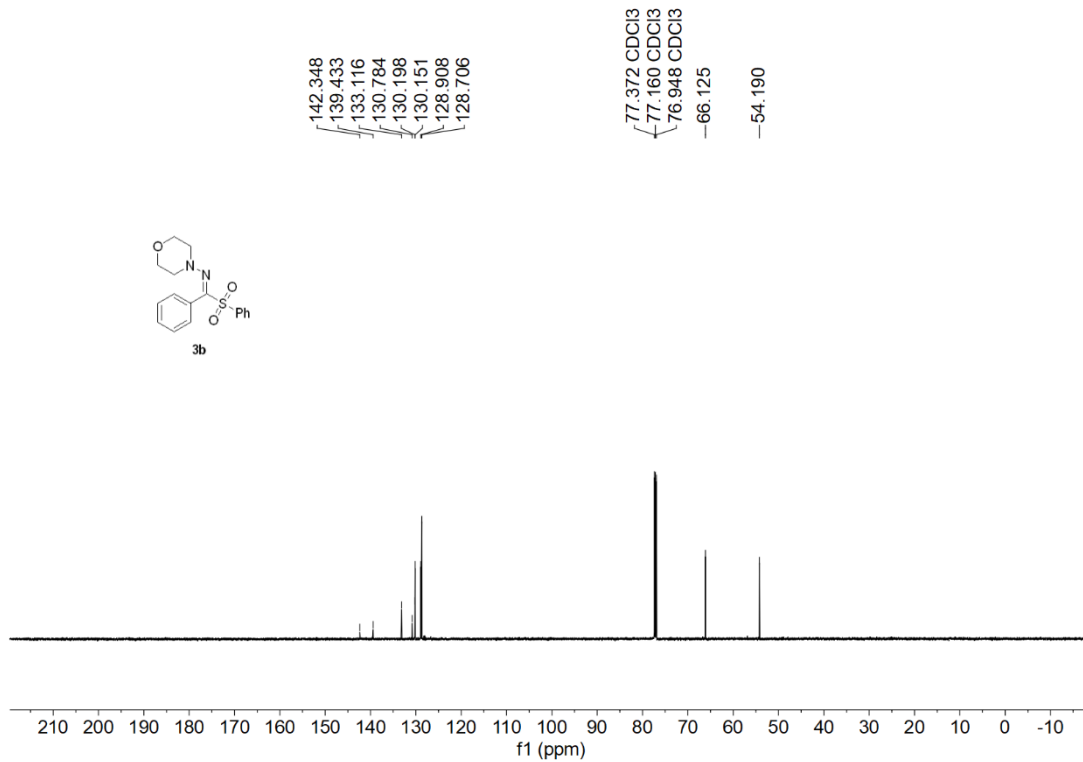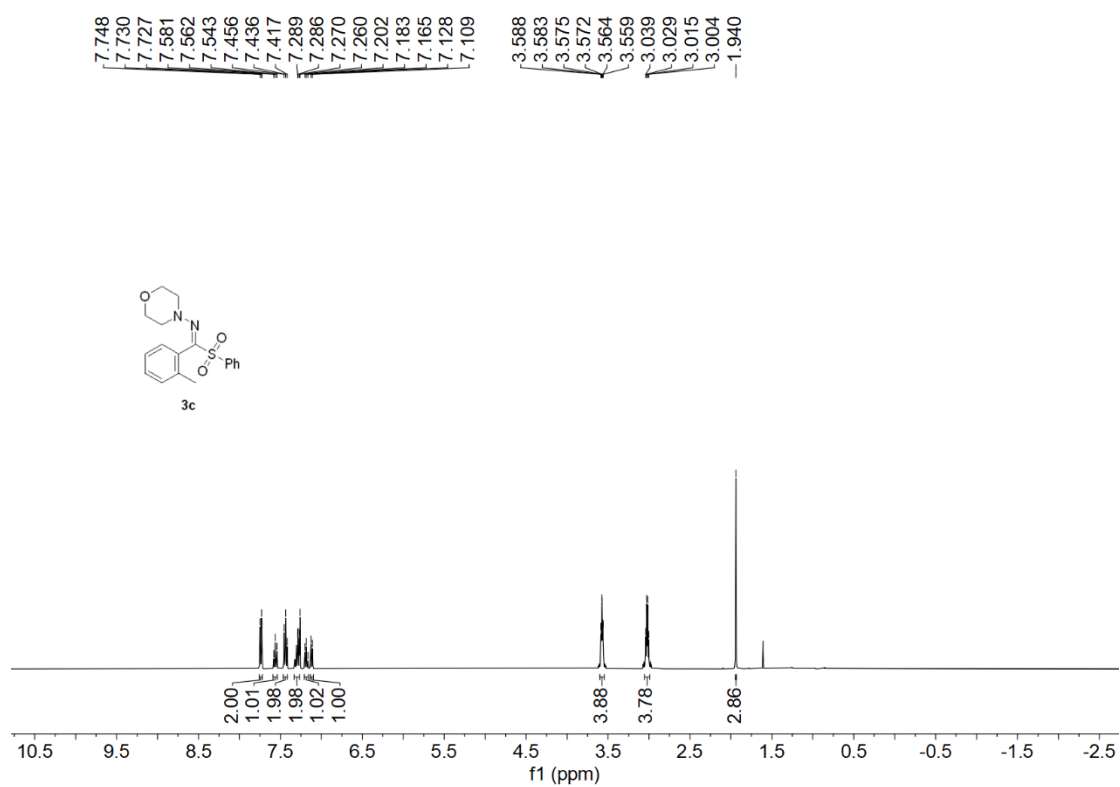

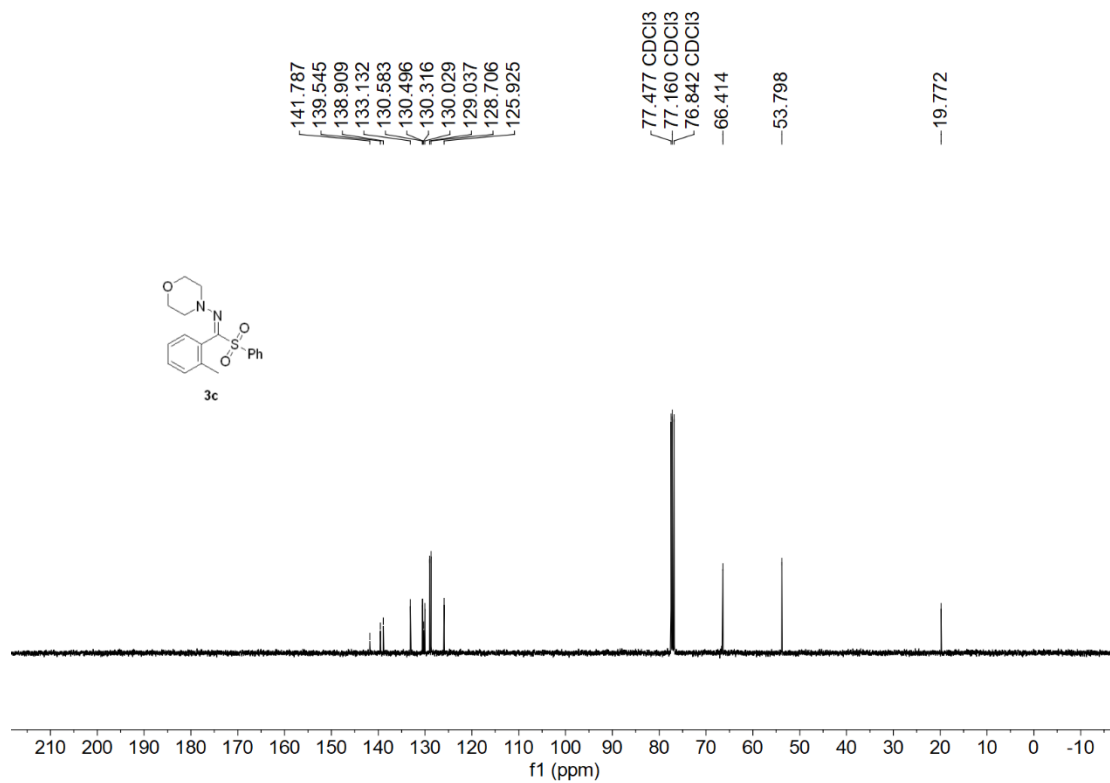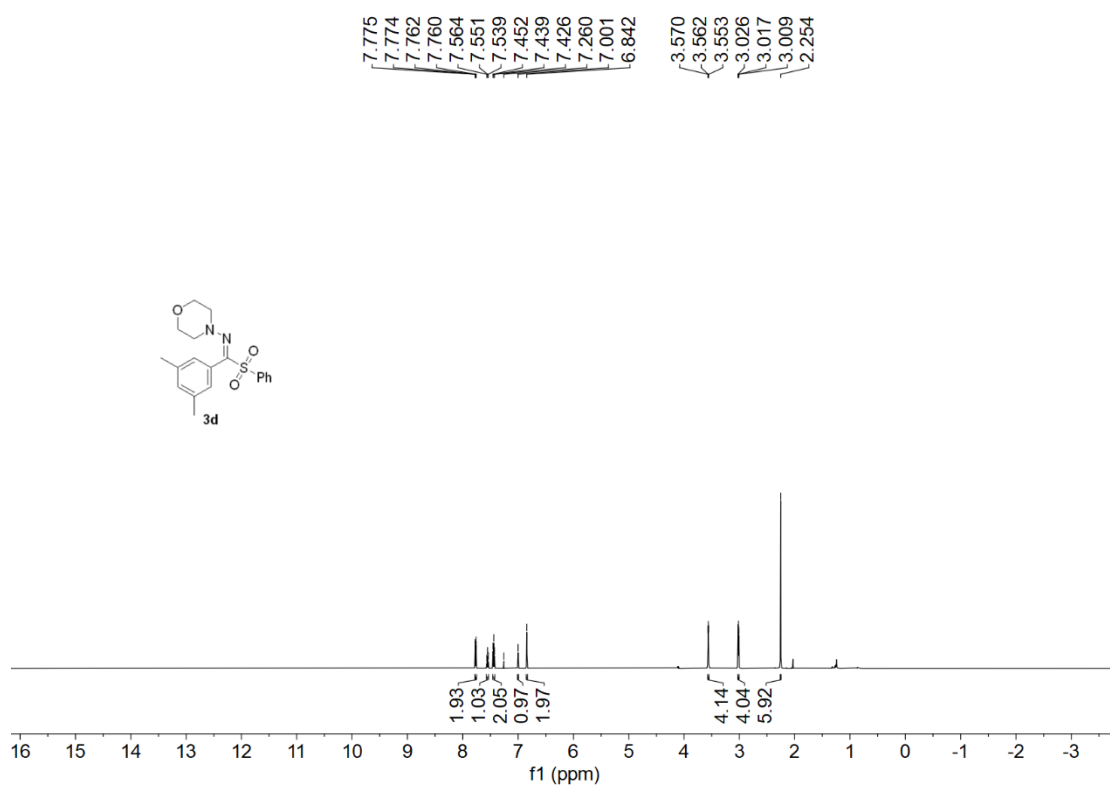

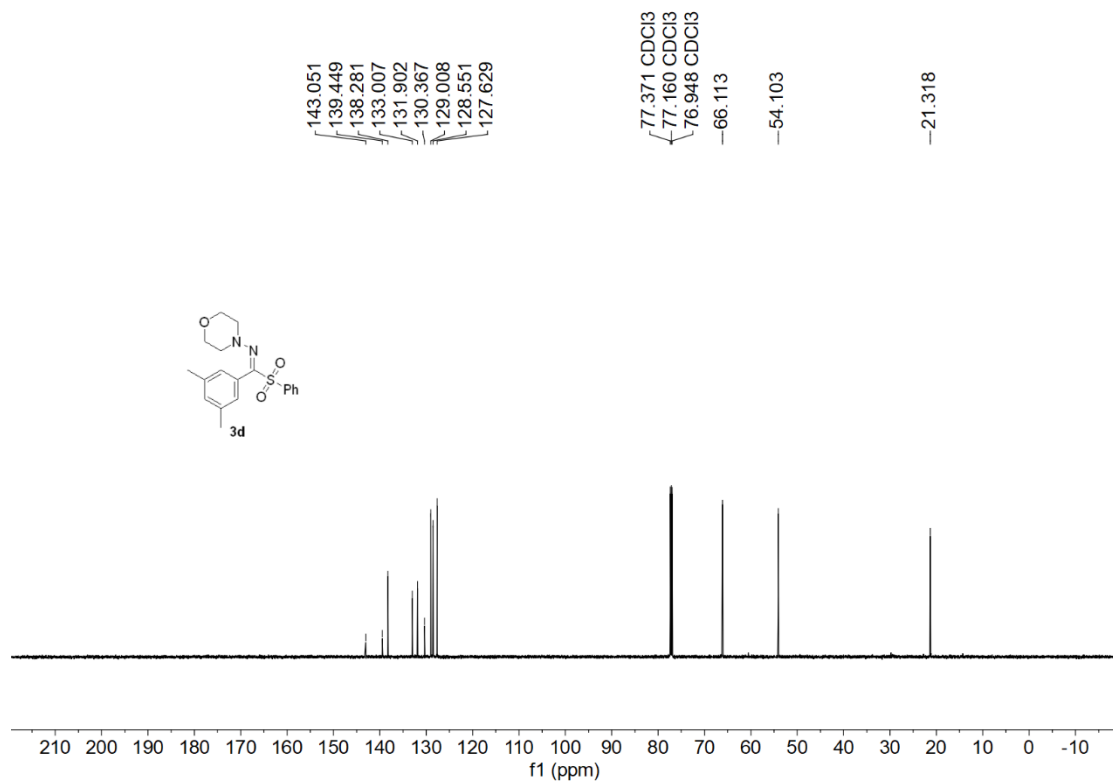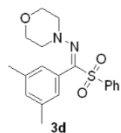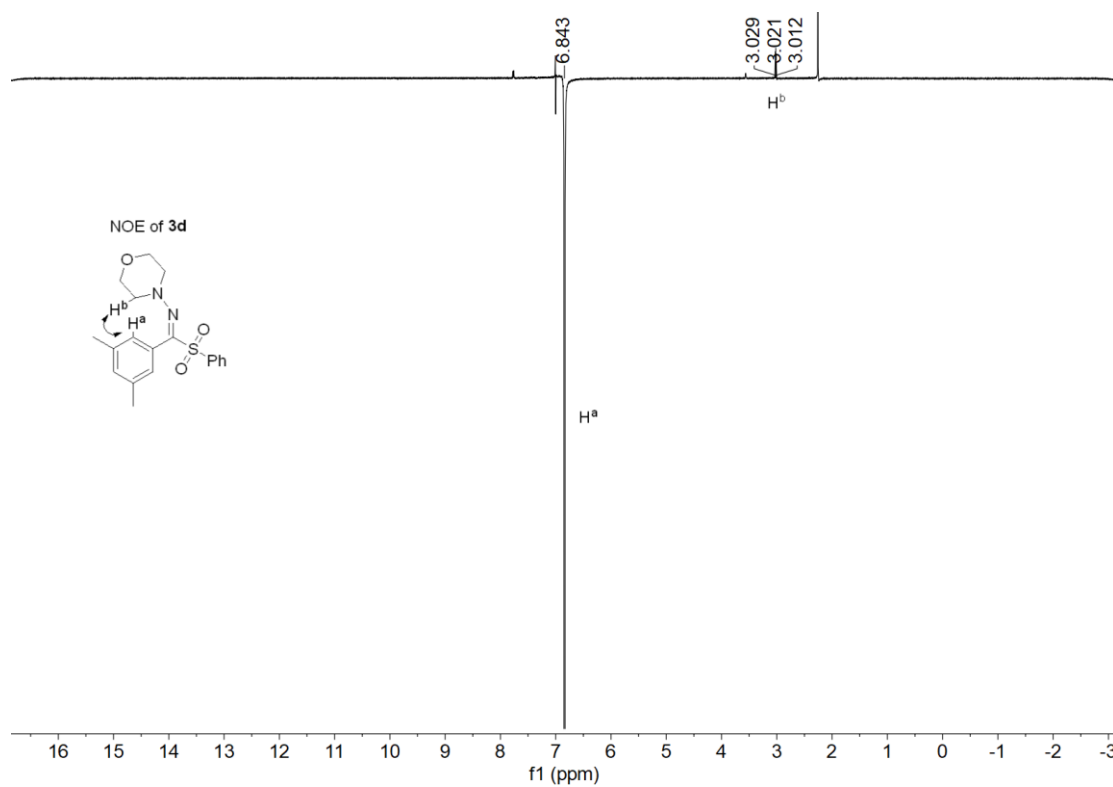

NOE of 3d

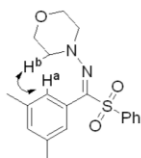



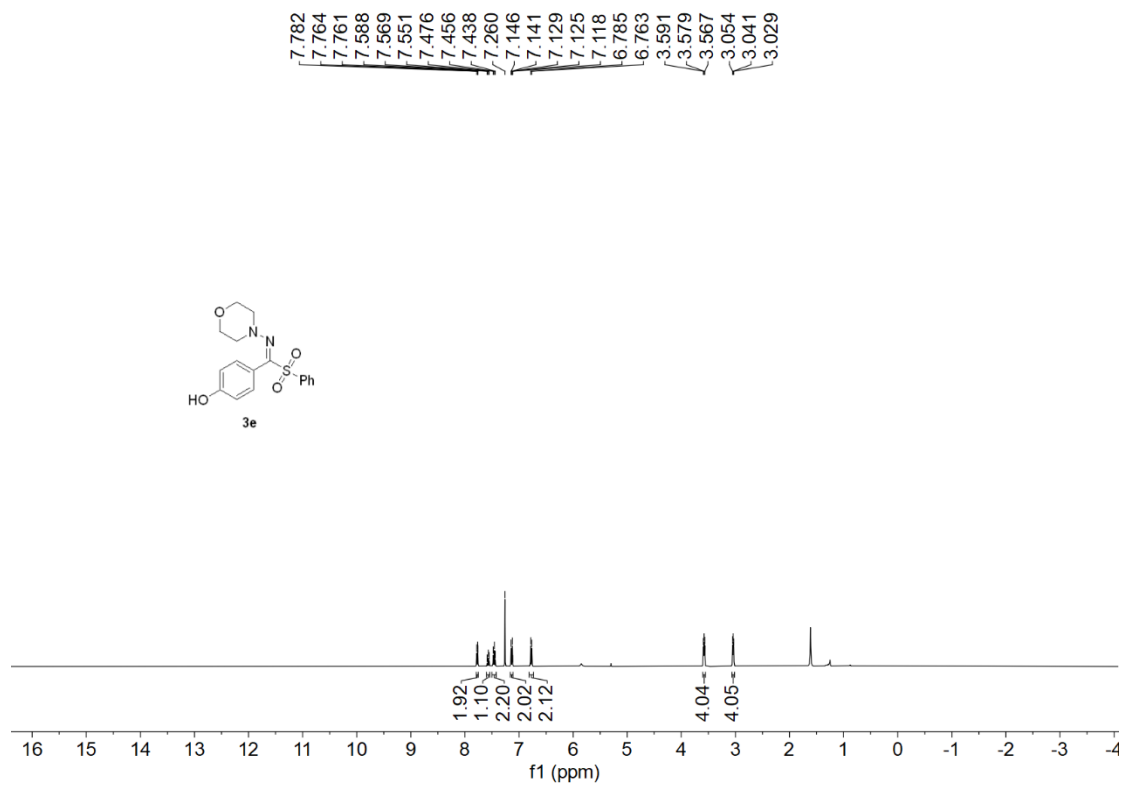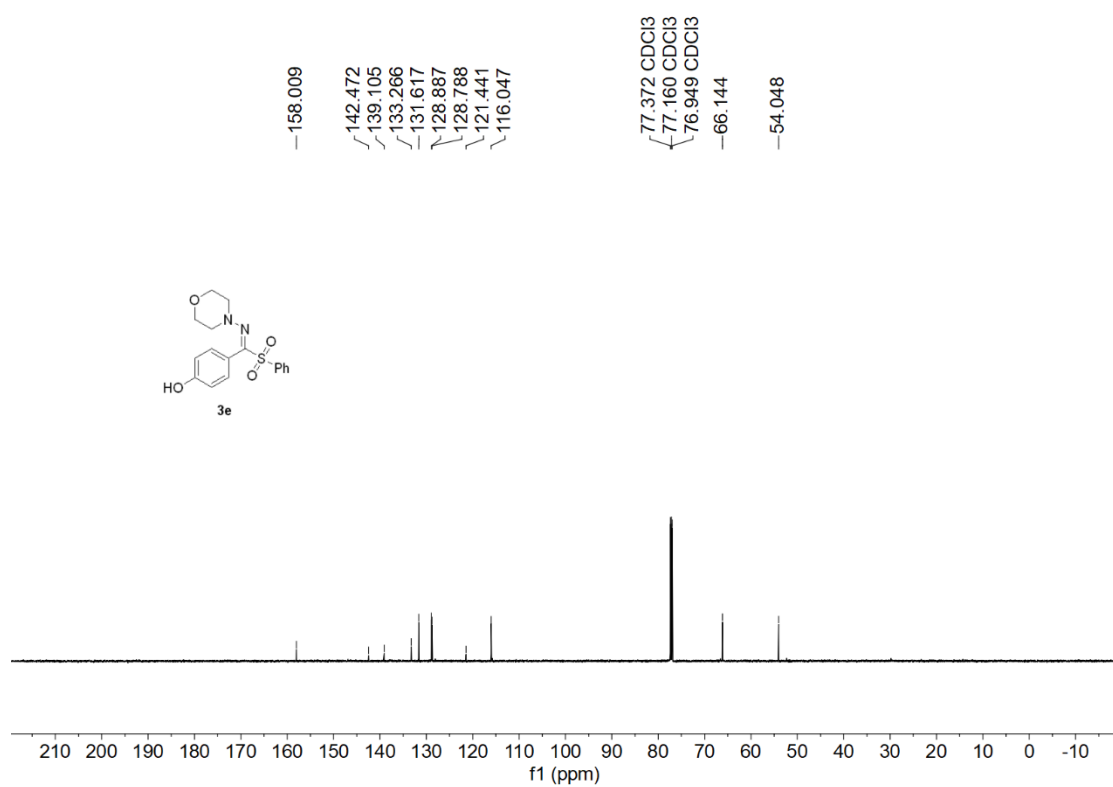

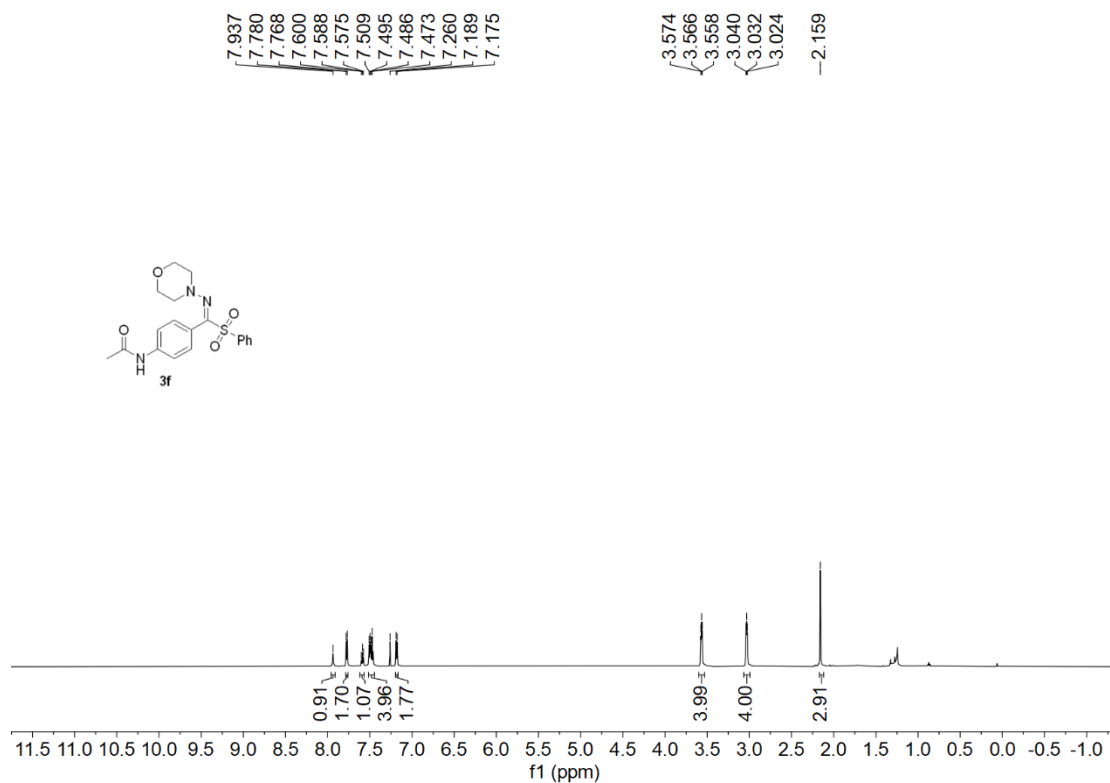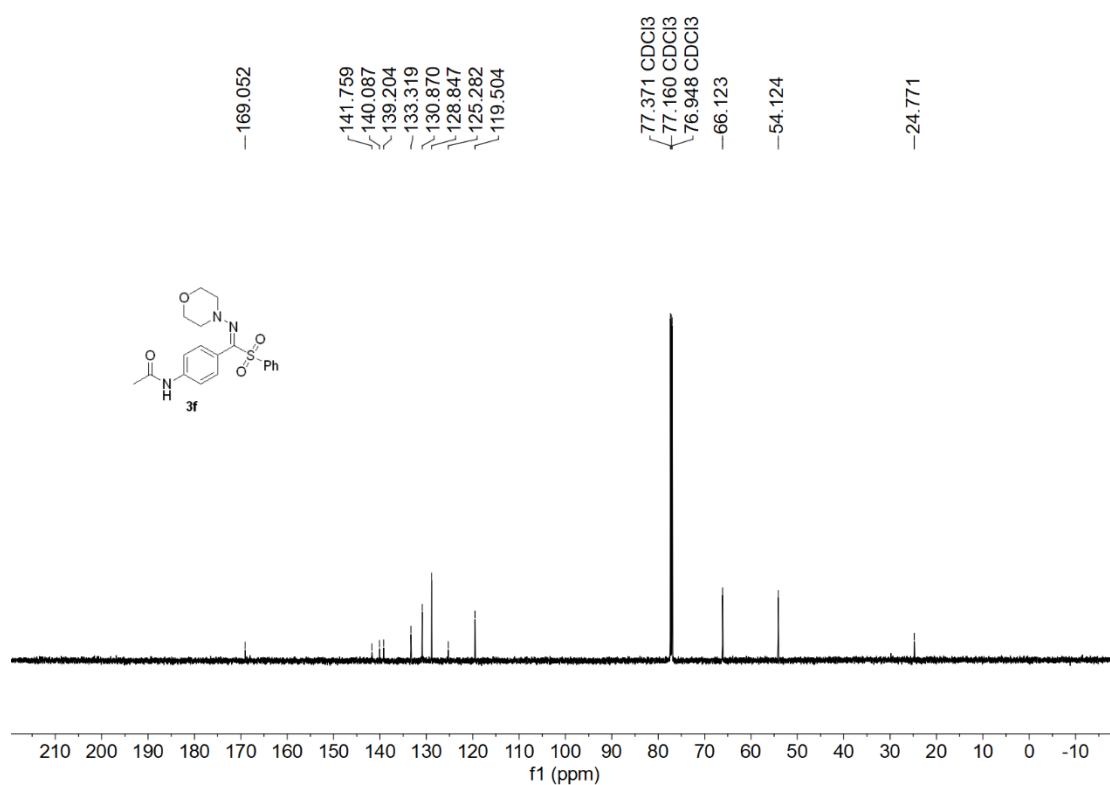

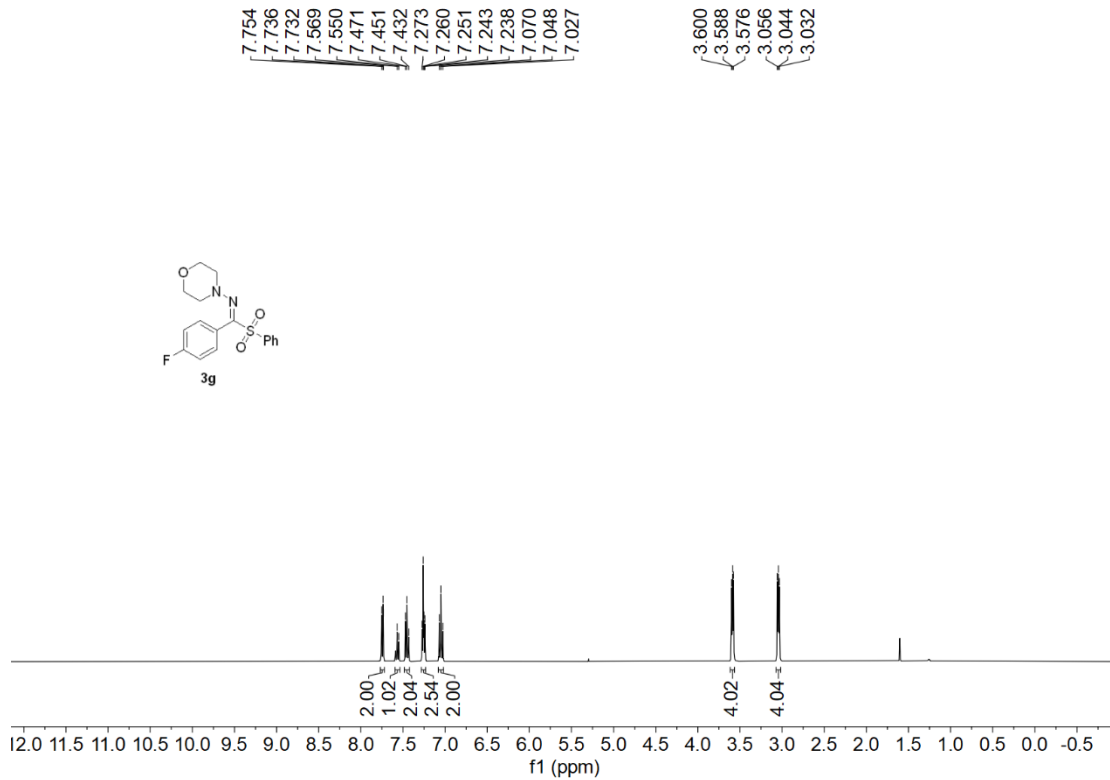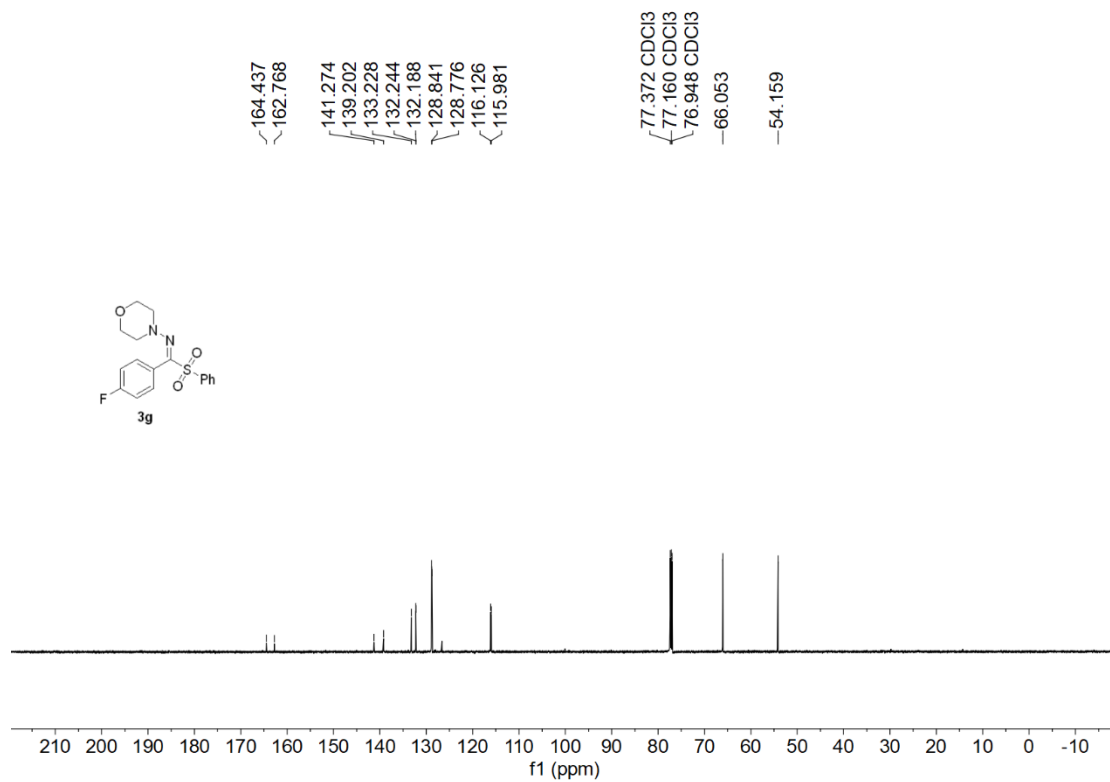

-108.924

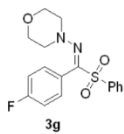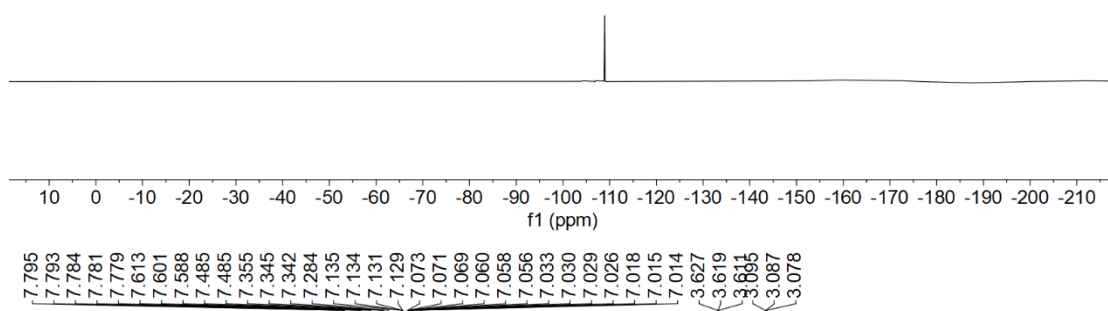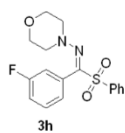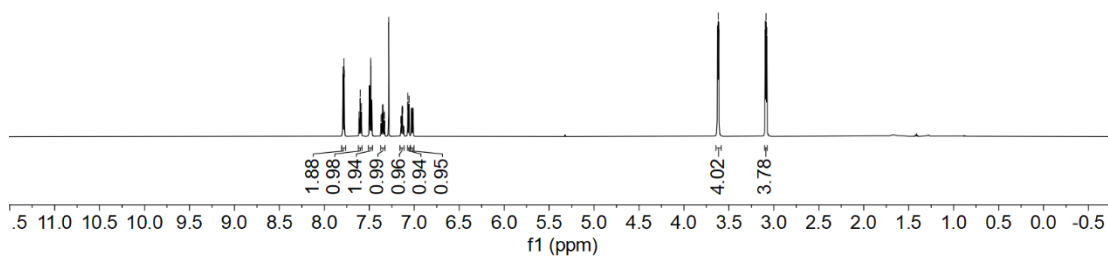

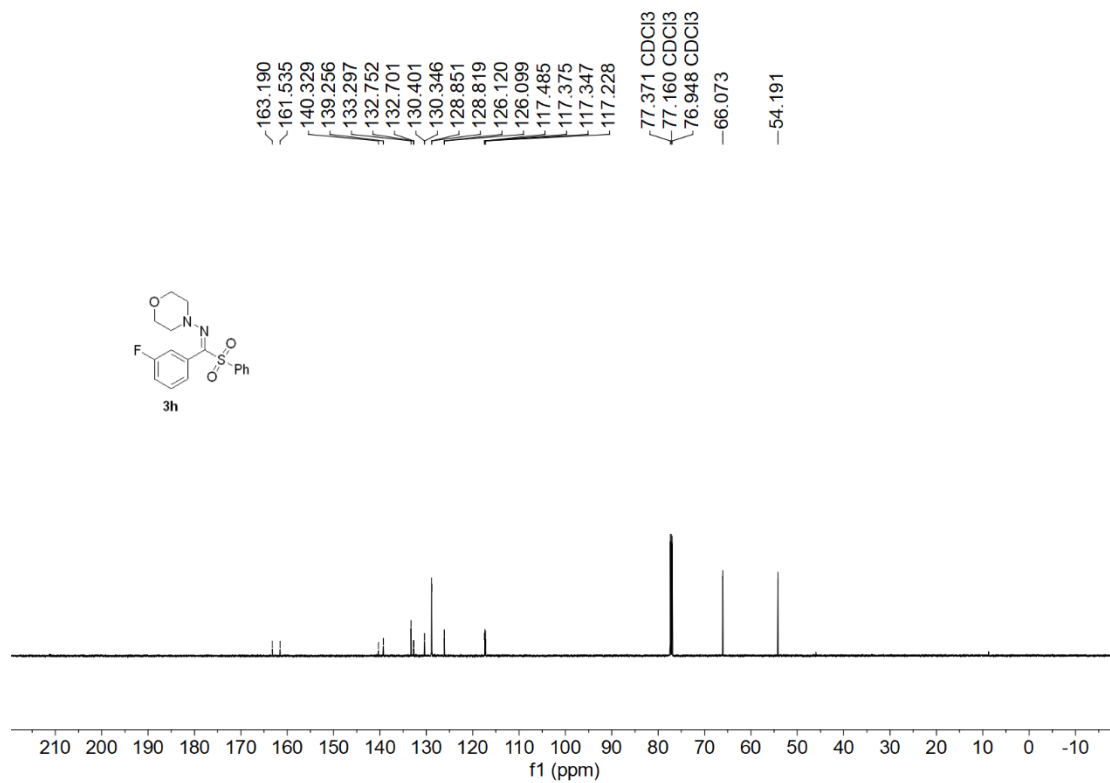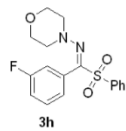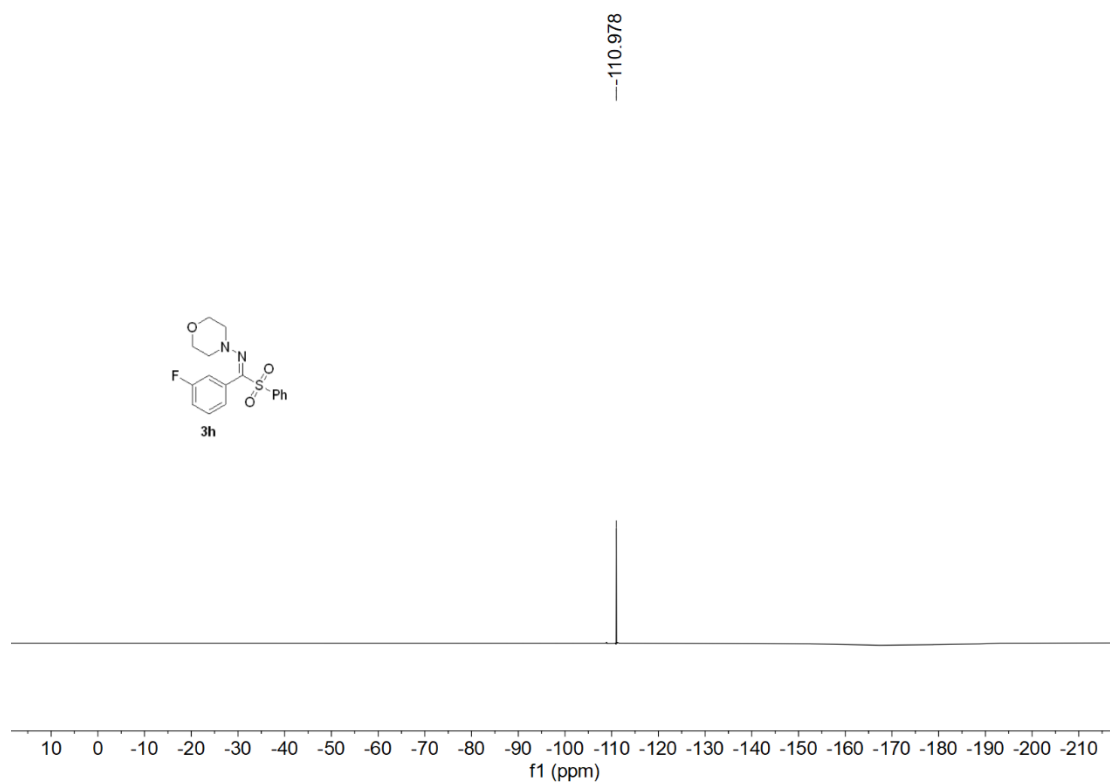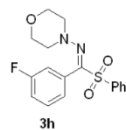

7.773  
7.755  
7.751  
7.609  
7.590  
7.571  
7.494  
7.474  
7.456  
7.409  
7.389  
7.370  
7.117  
7.113  
7.095  
7.090  
7.015  
7.012  
6.994  
6.992

3.618  
3.606  
3.594  
3.084  
3.072  
3.060

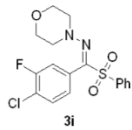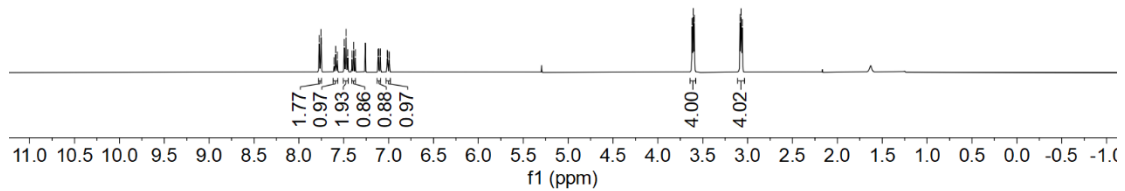

158.659  
156.985  
139.121  
133.436  
131.055  
128.930  
128.832  
126.843  
126.817  
123.629  
118.558  
118.413

77.372 CDCl3  
77.160 CDCl3  
76.948 CDCl3  
-66.057  
-54.238

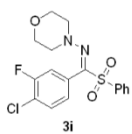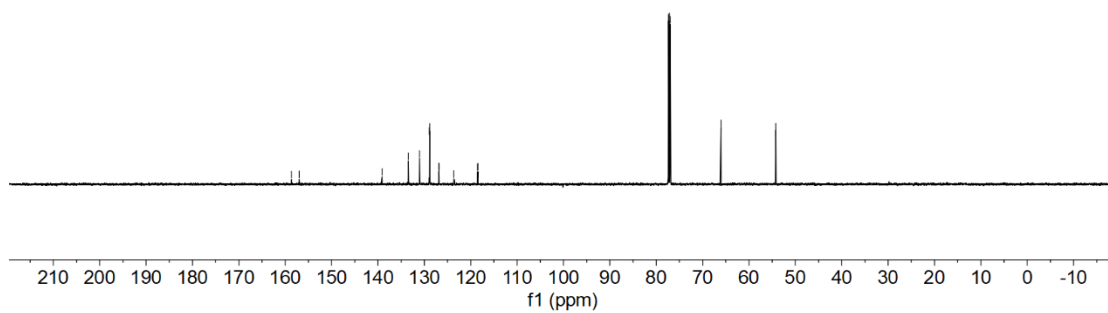

--112.831

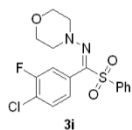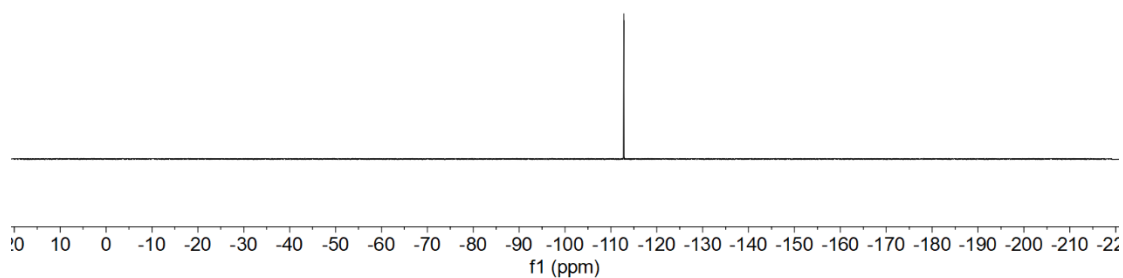

7.813  
7.795  
7.791  
7.777  
7.590  
7.571  
7.553  
7.472  
7.452  
7.433  
7.426  
7.413  
7.407  
7.392  
7.390  
7.373  
7.122  
7.116  
7.105  
7.102  
7.099  
7.096  
7.085  
3.668  
3.646  
3.641  
3.635  
3.630  
3.621  
3.223  
3.213  
3.209  
3.198  
3.191  
3.181  
3.176  
3.166  
3.129  
3.120  
3.114  
3.104  
3.097  
3.087  
3.083  
3.073

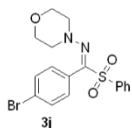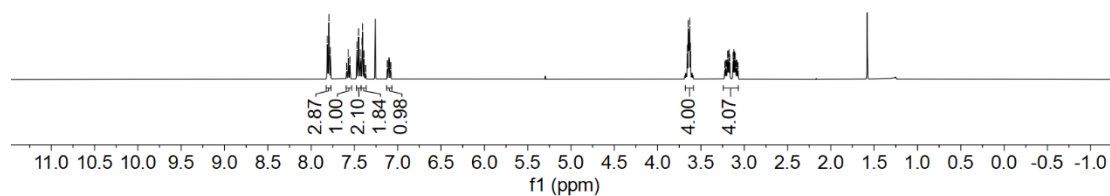

2.87  
1.00  
2.10  
1.84  
0.98  
4.00  
4.07

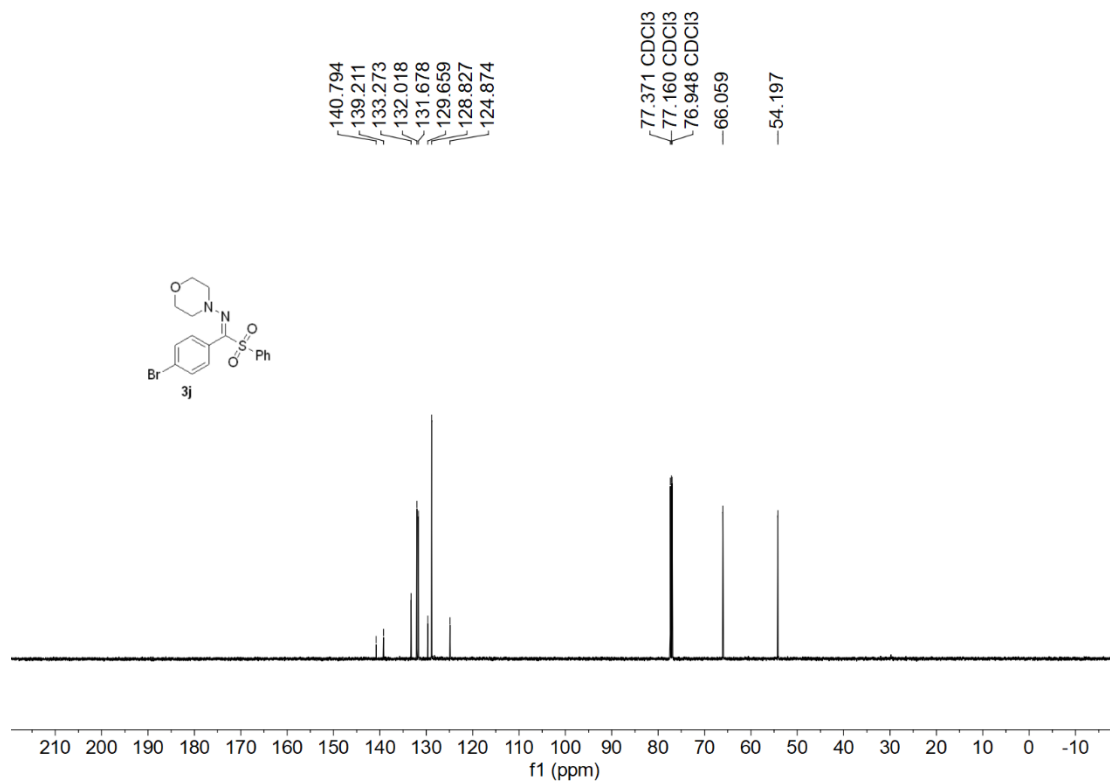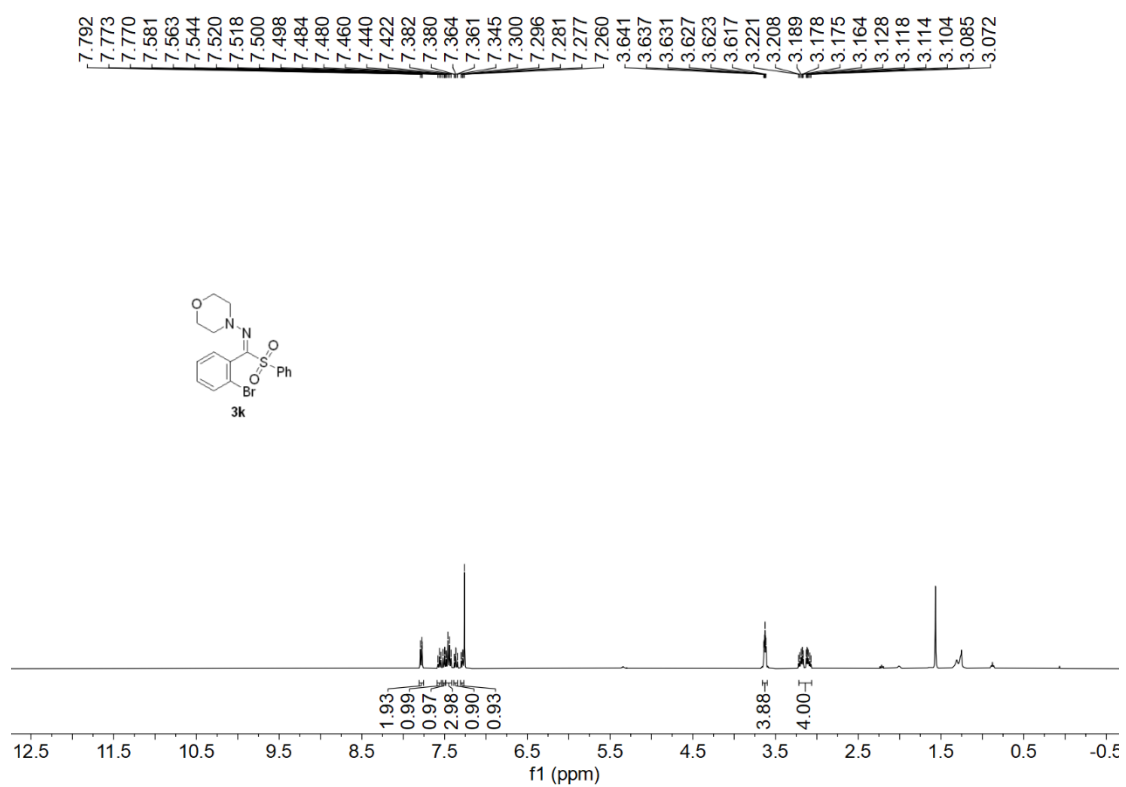



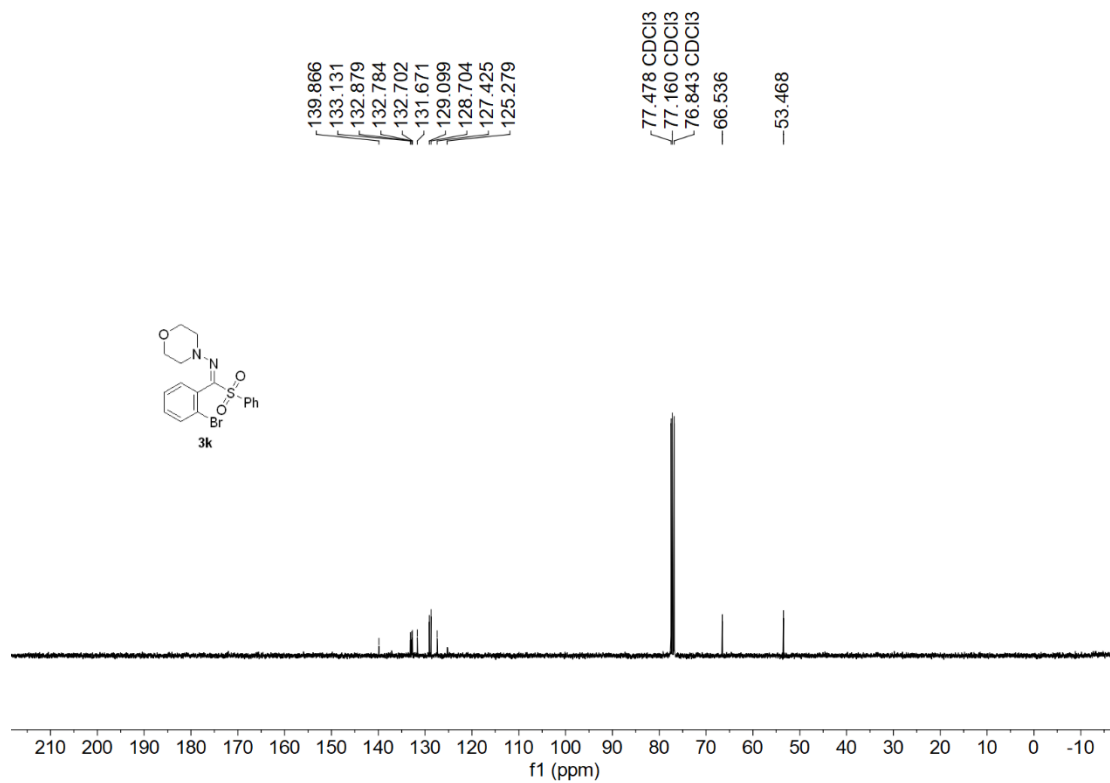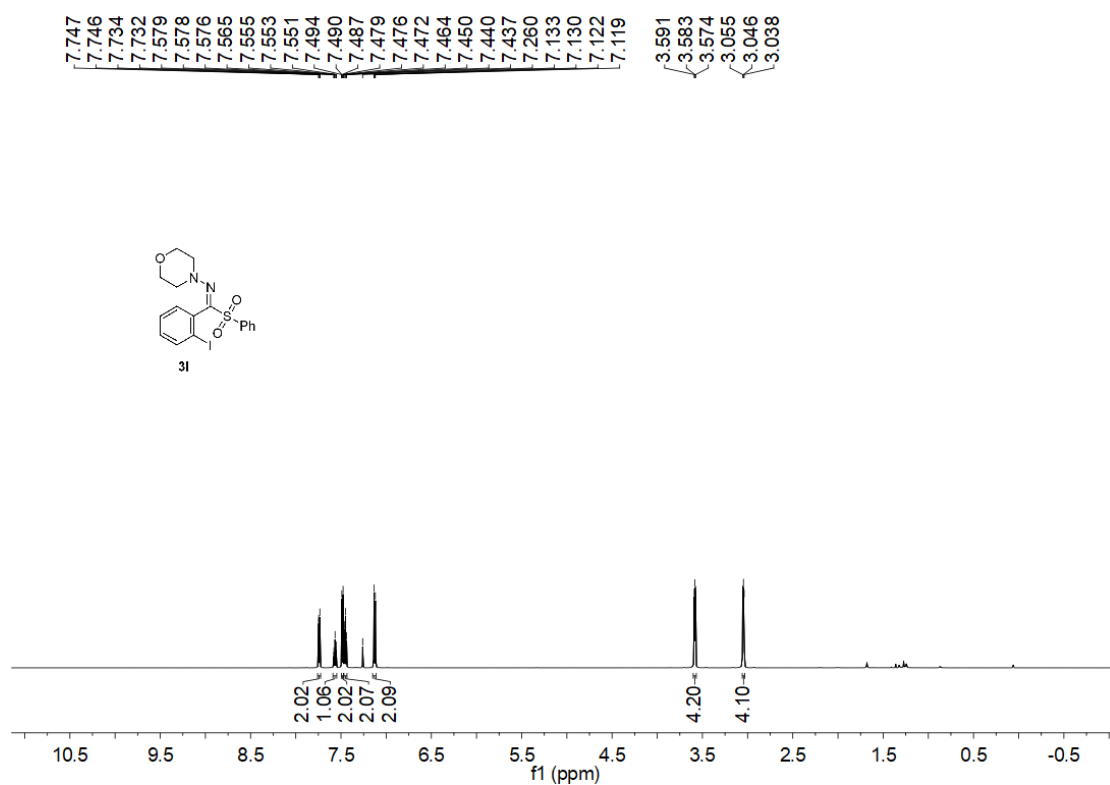

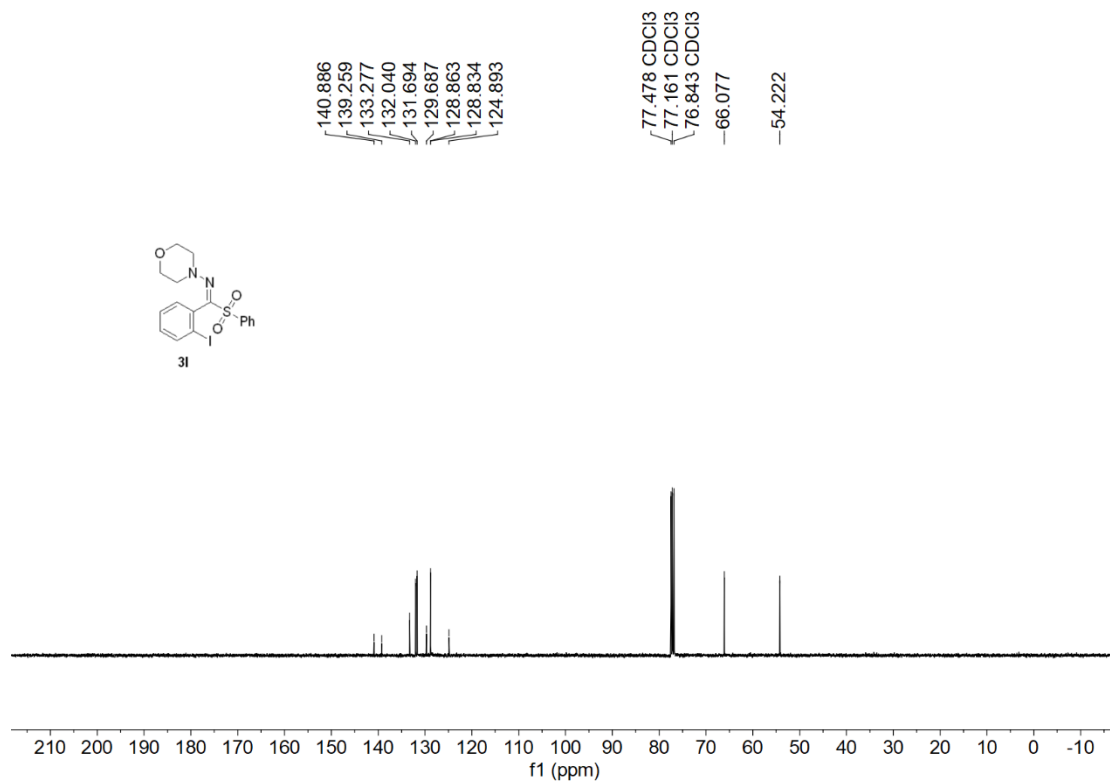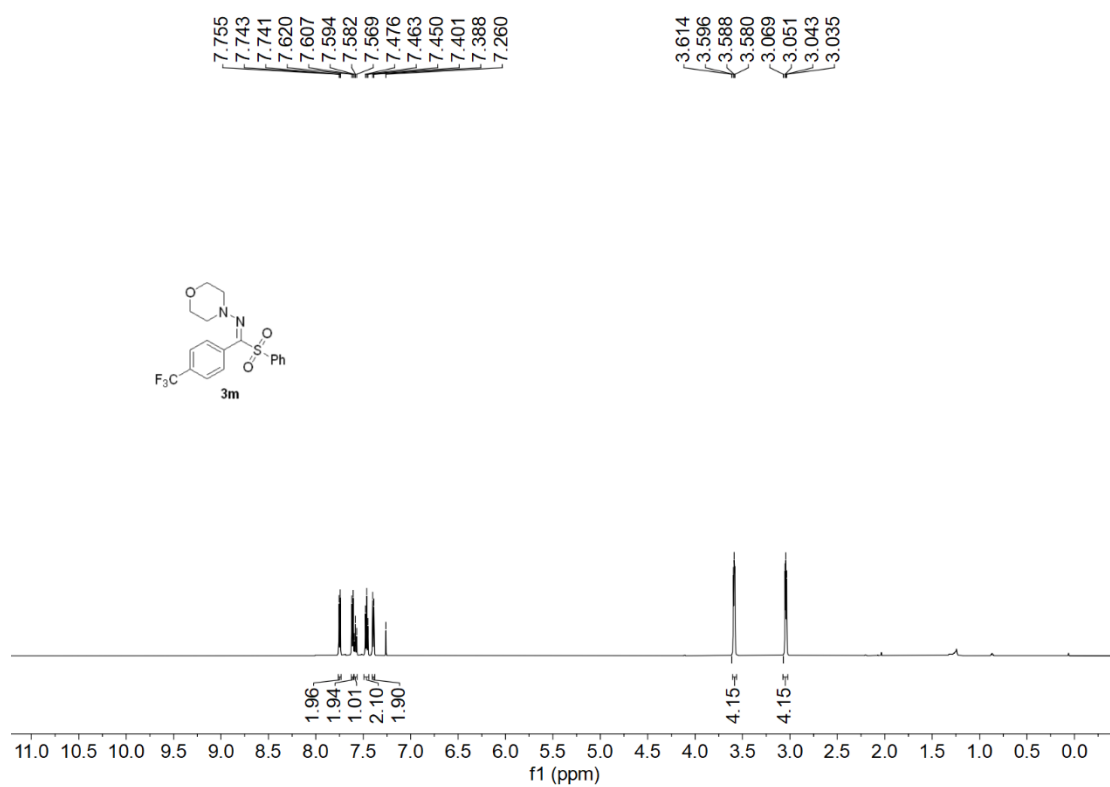

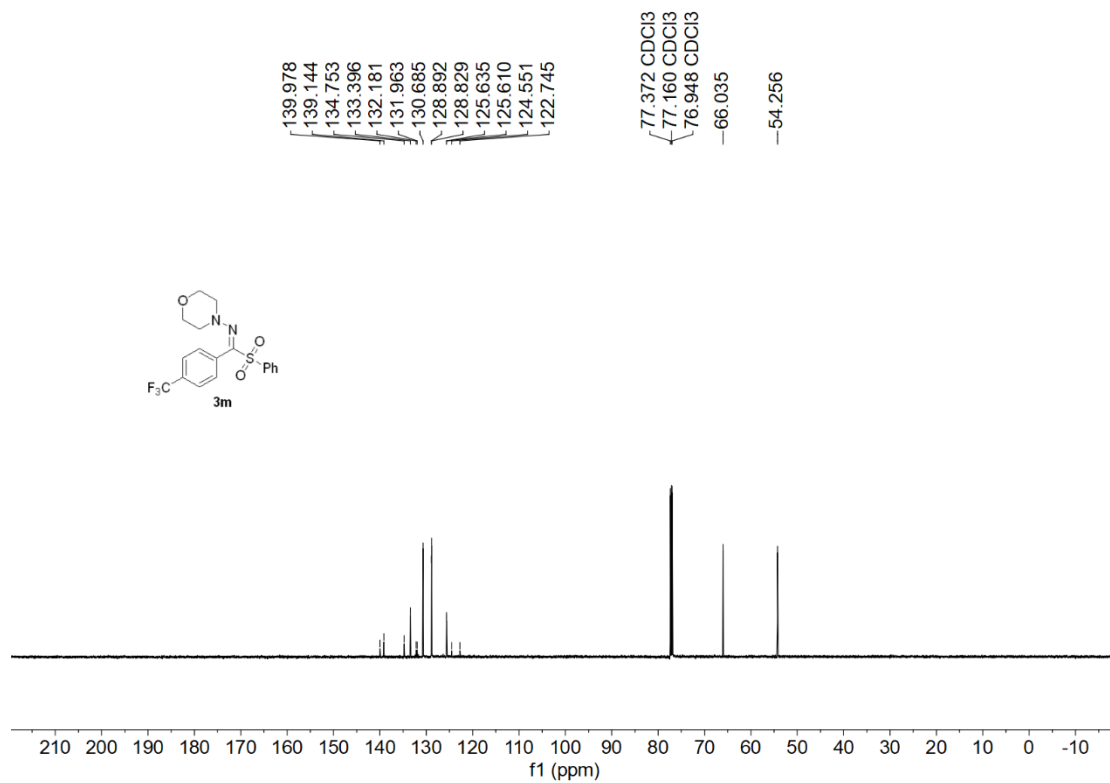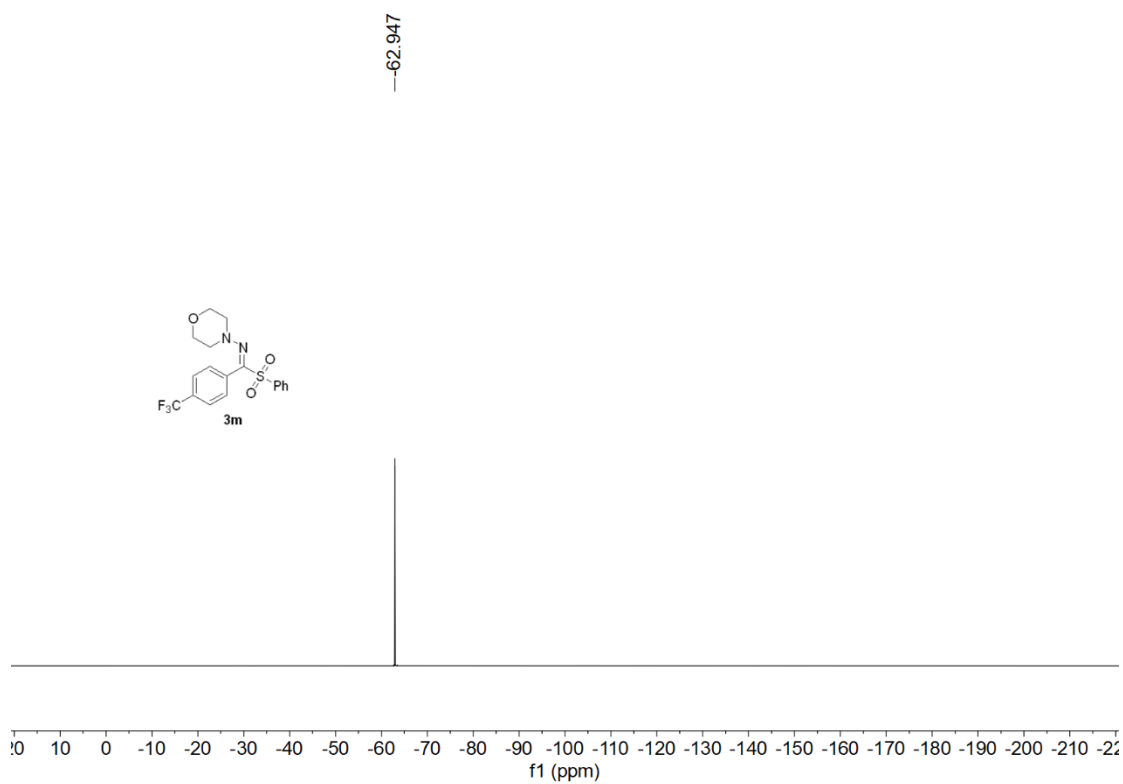

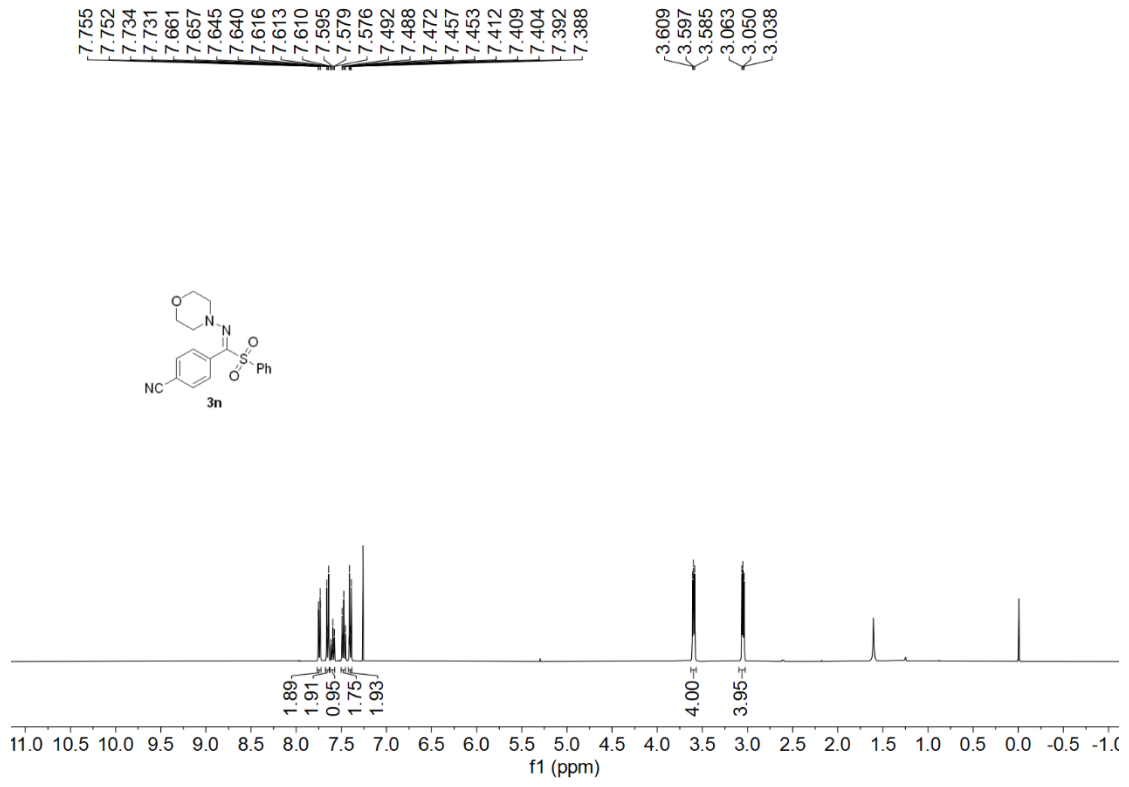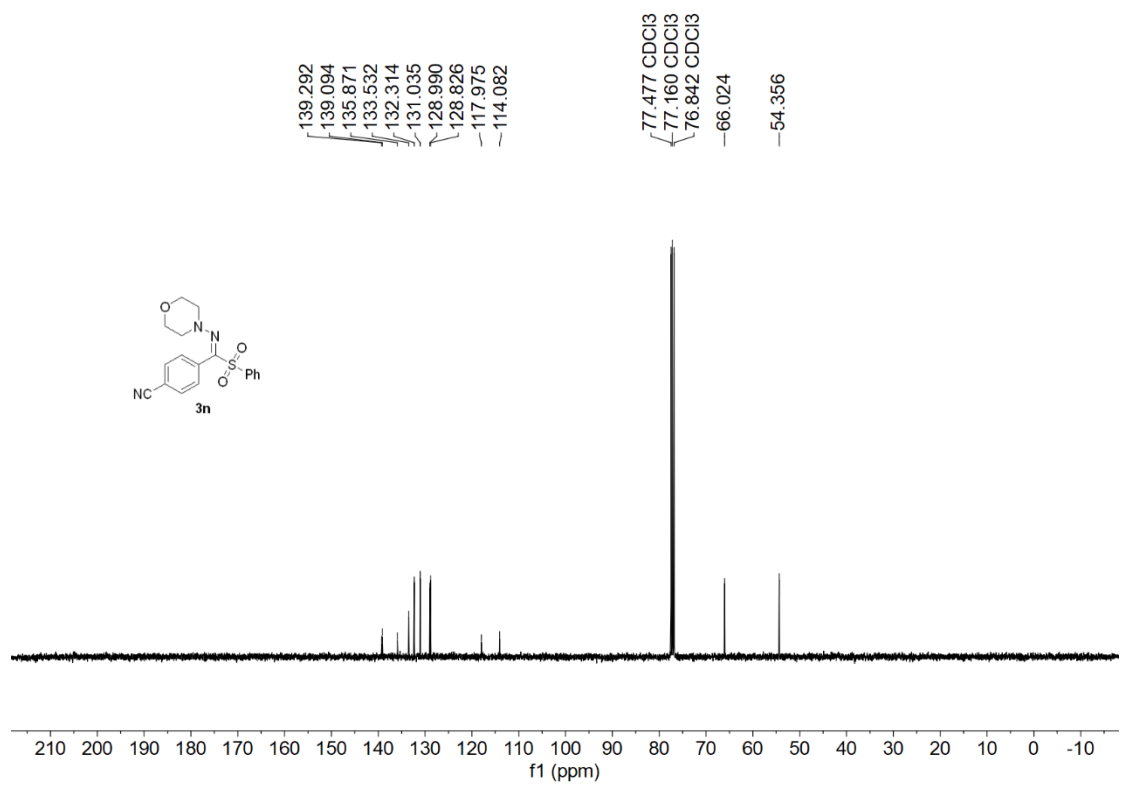

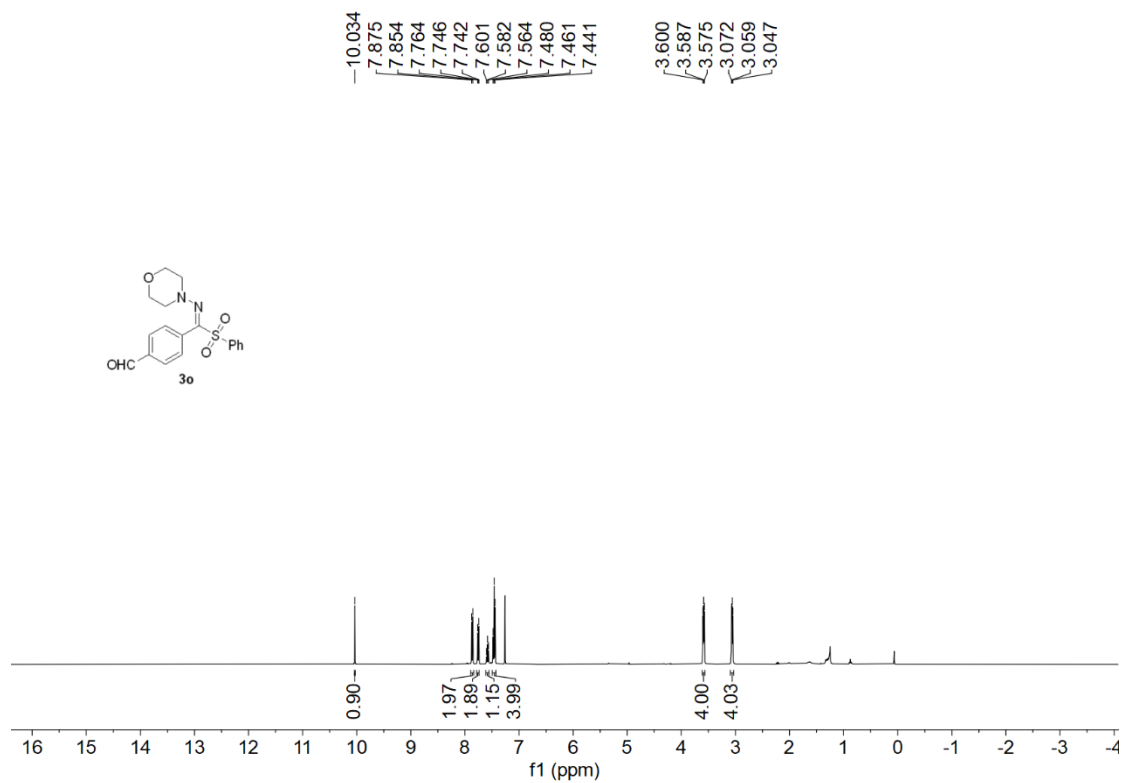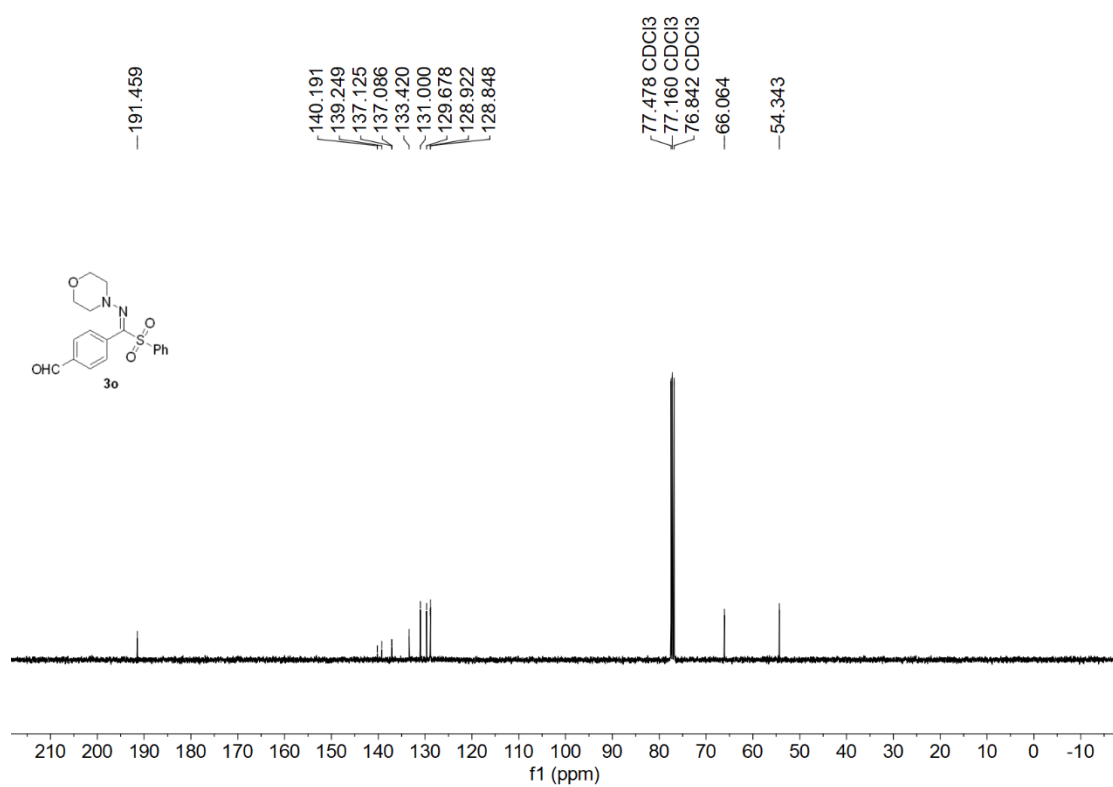

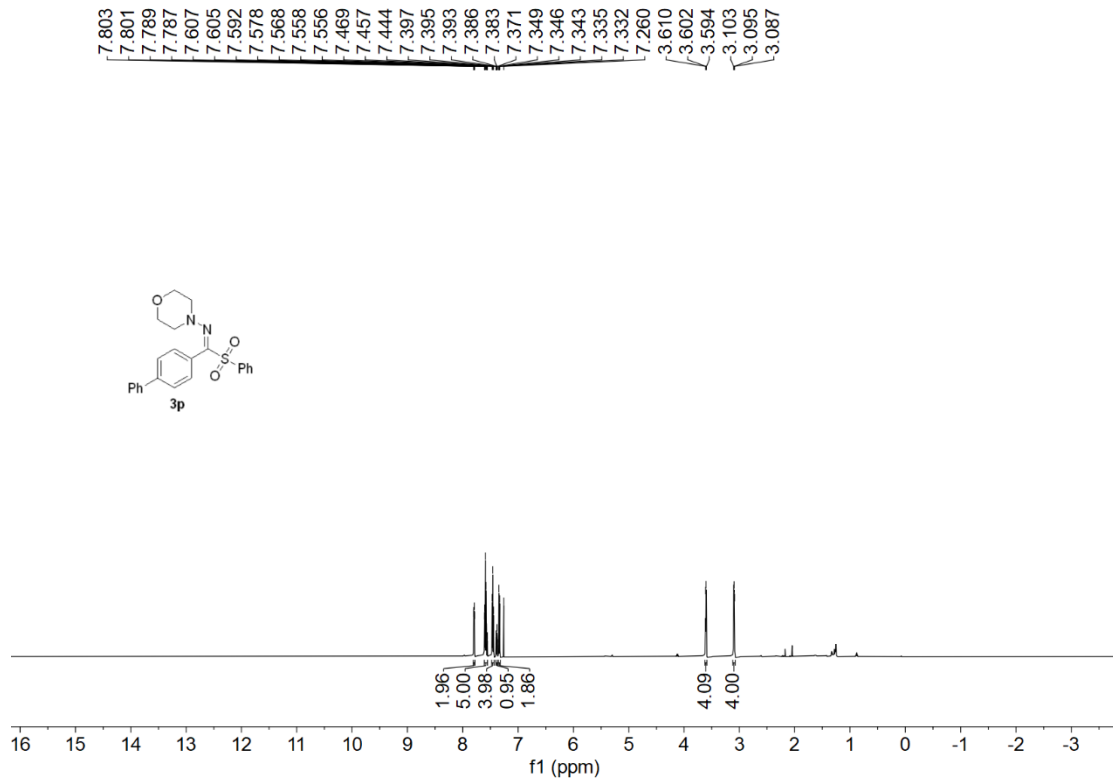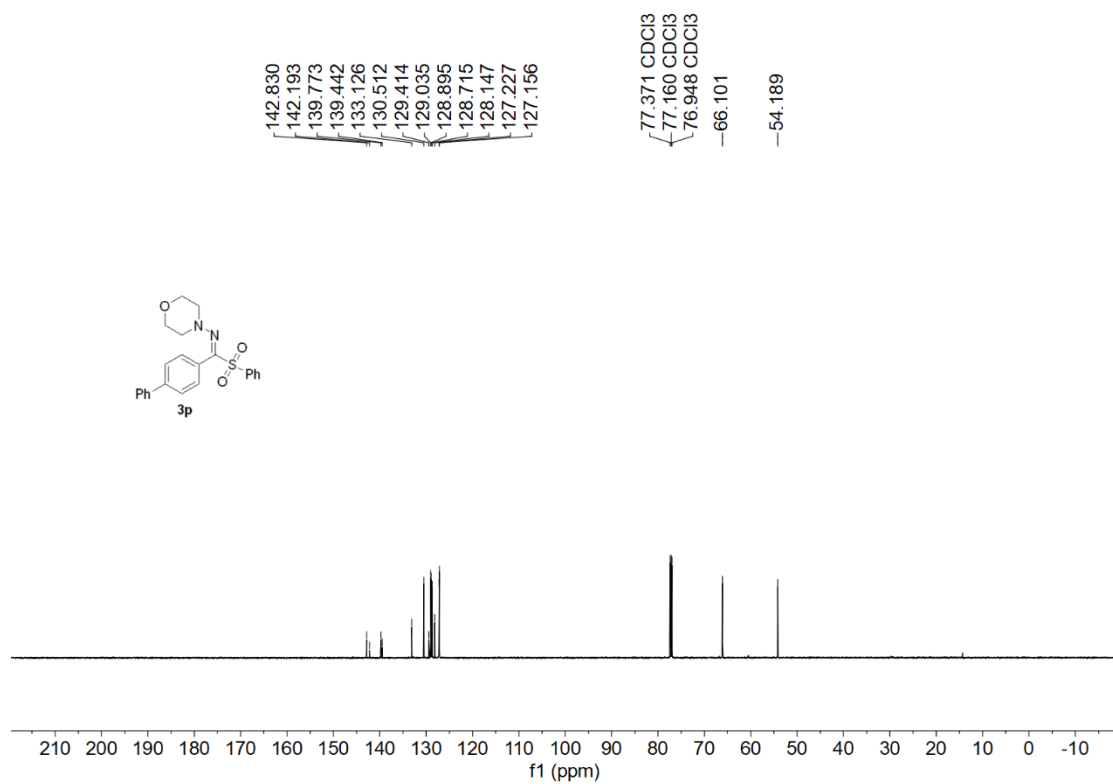

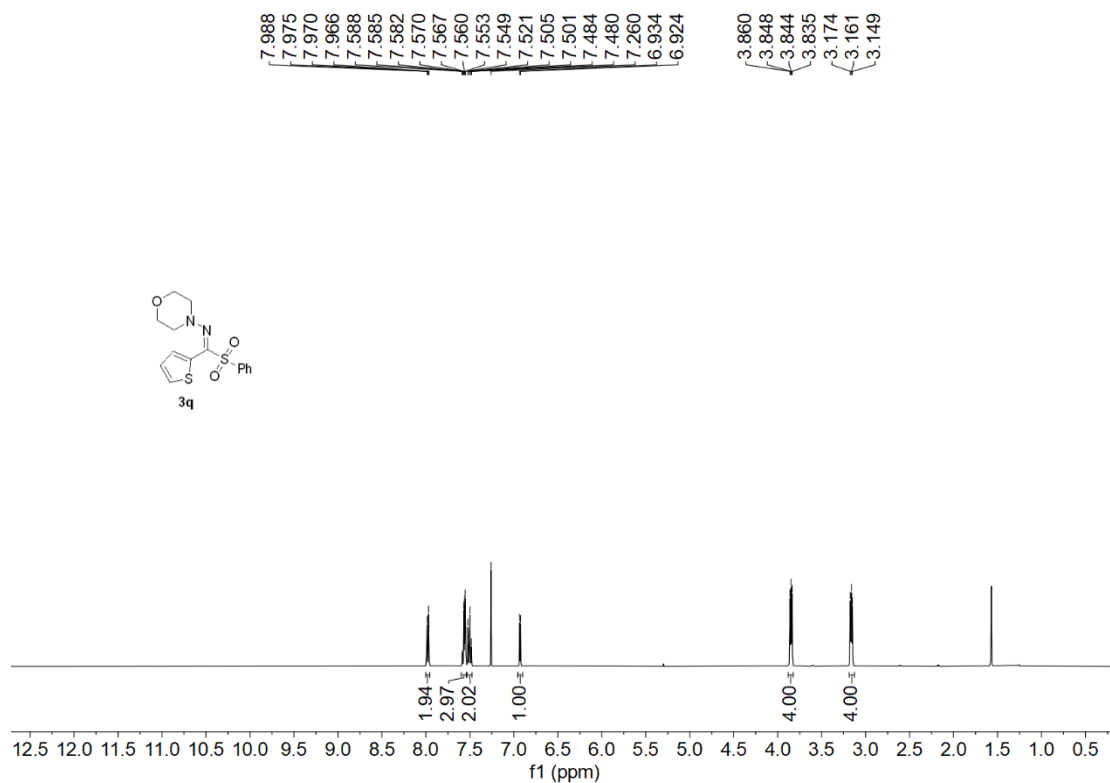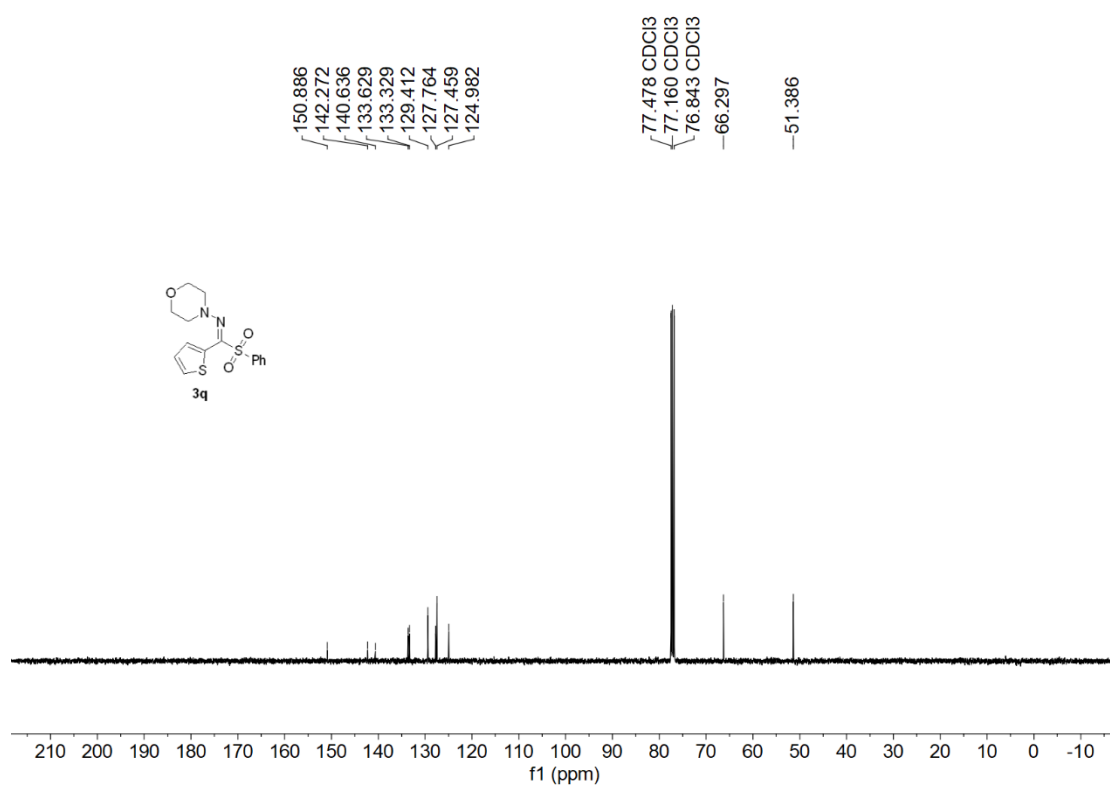

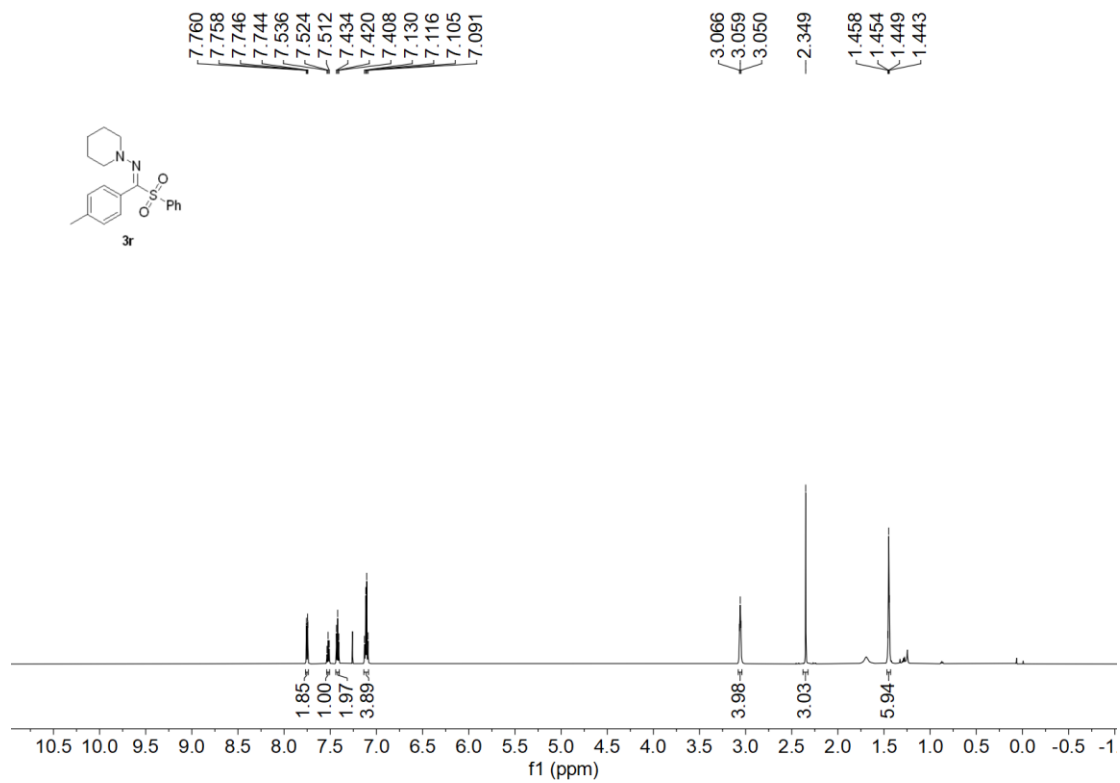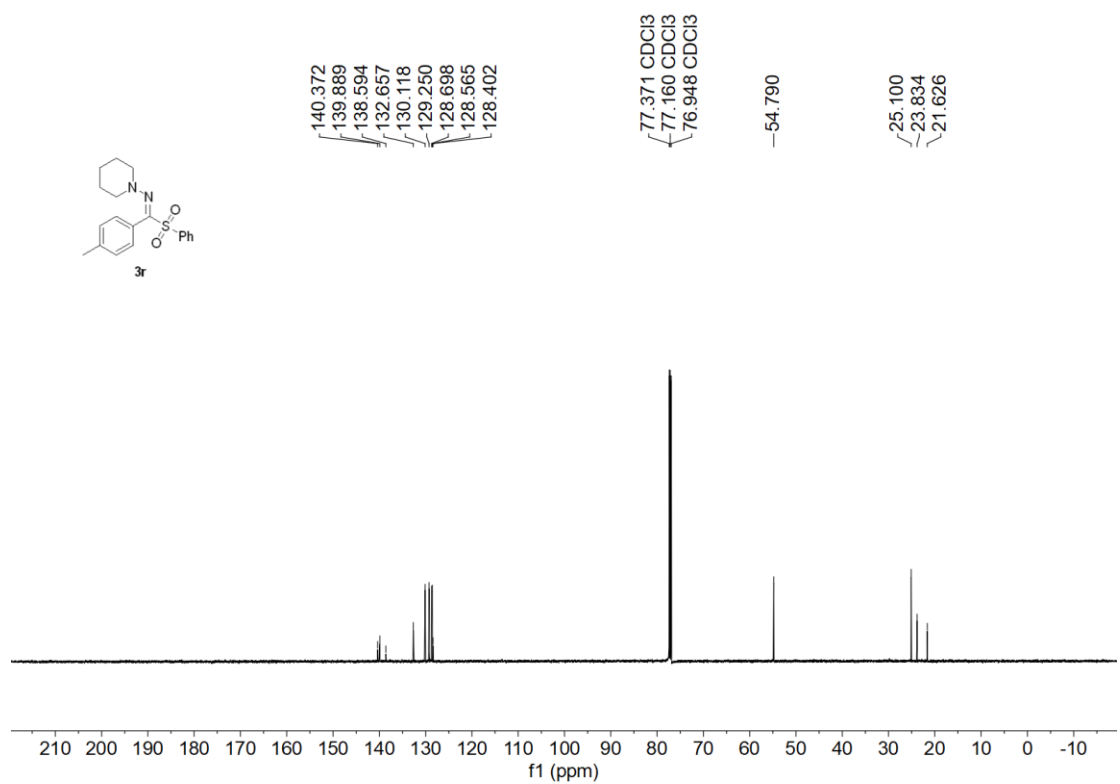



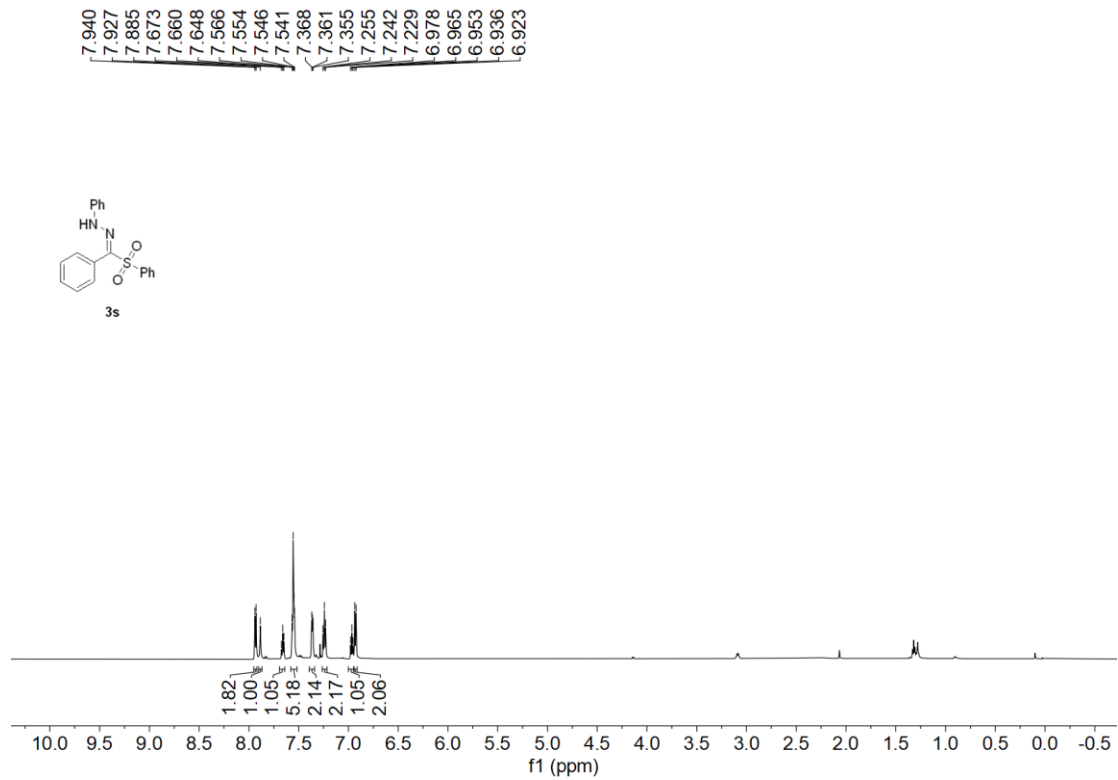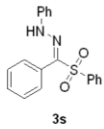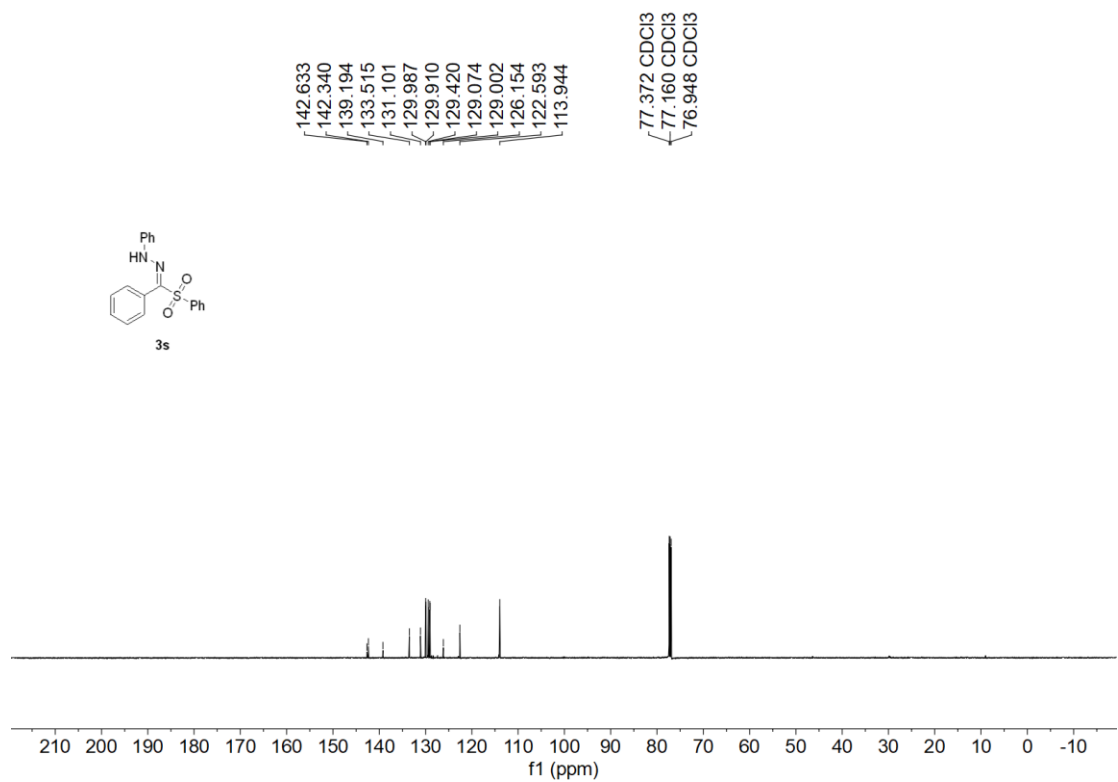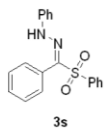

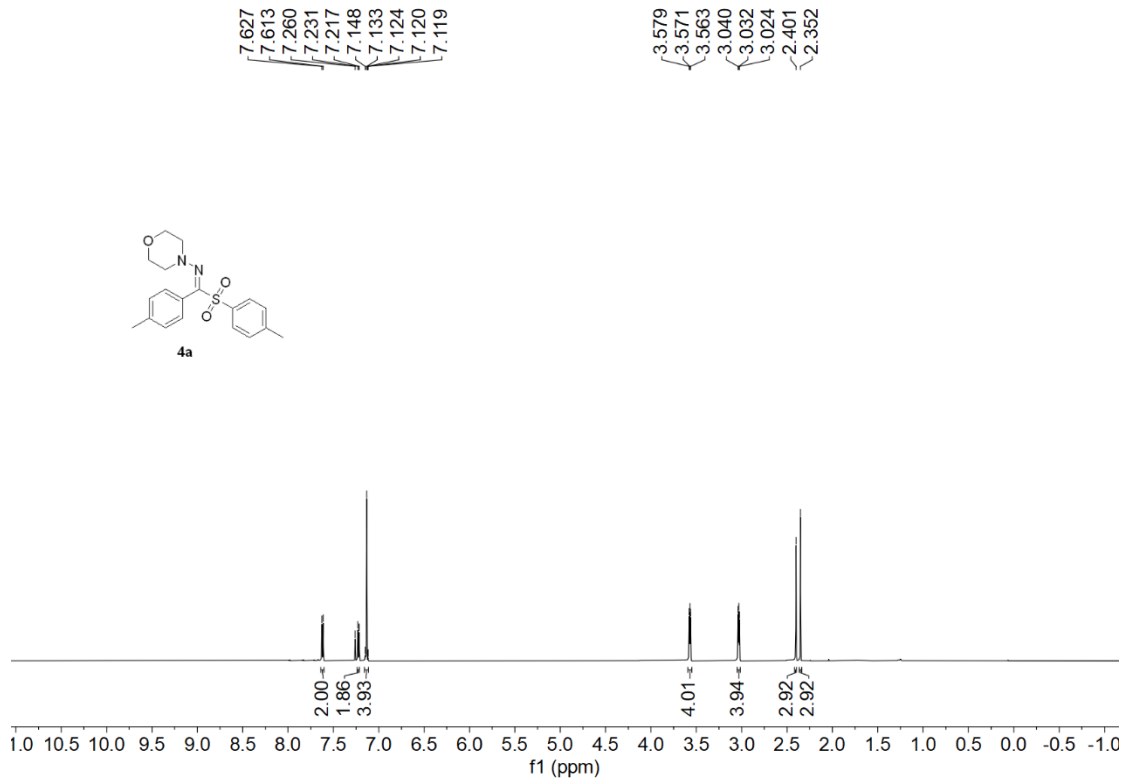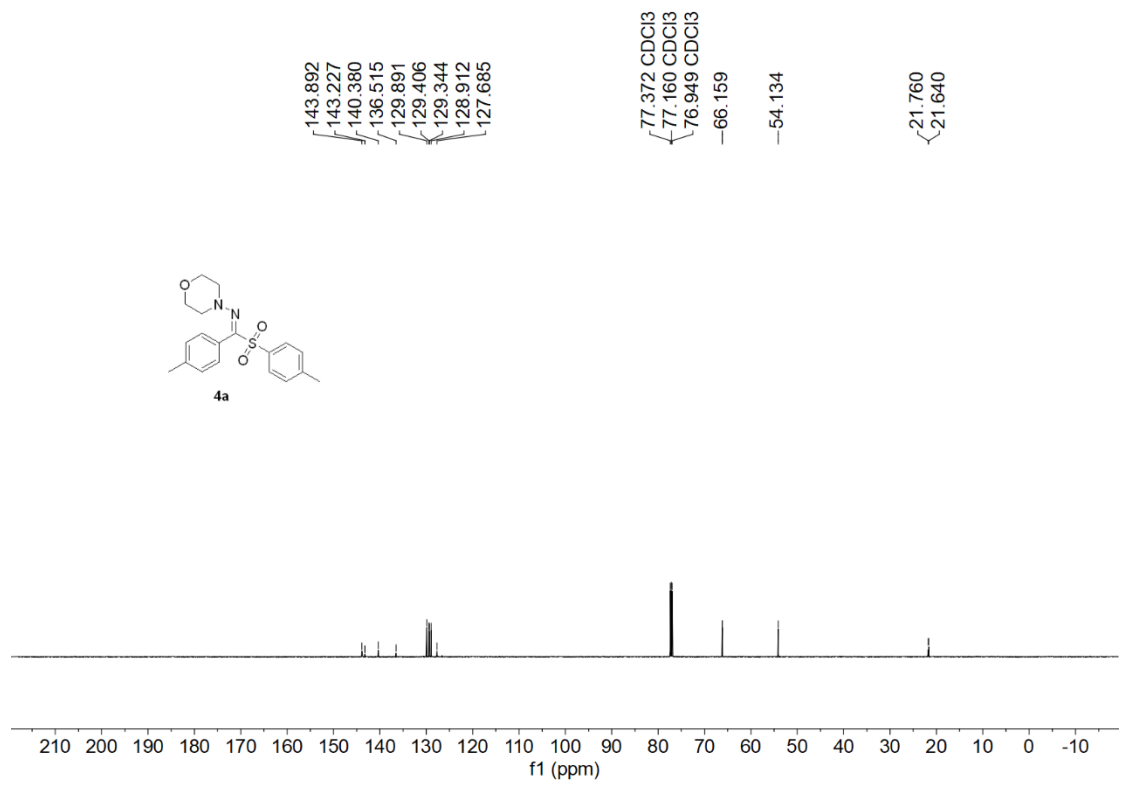

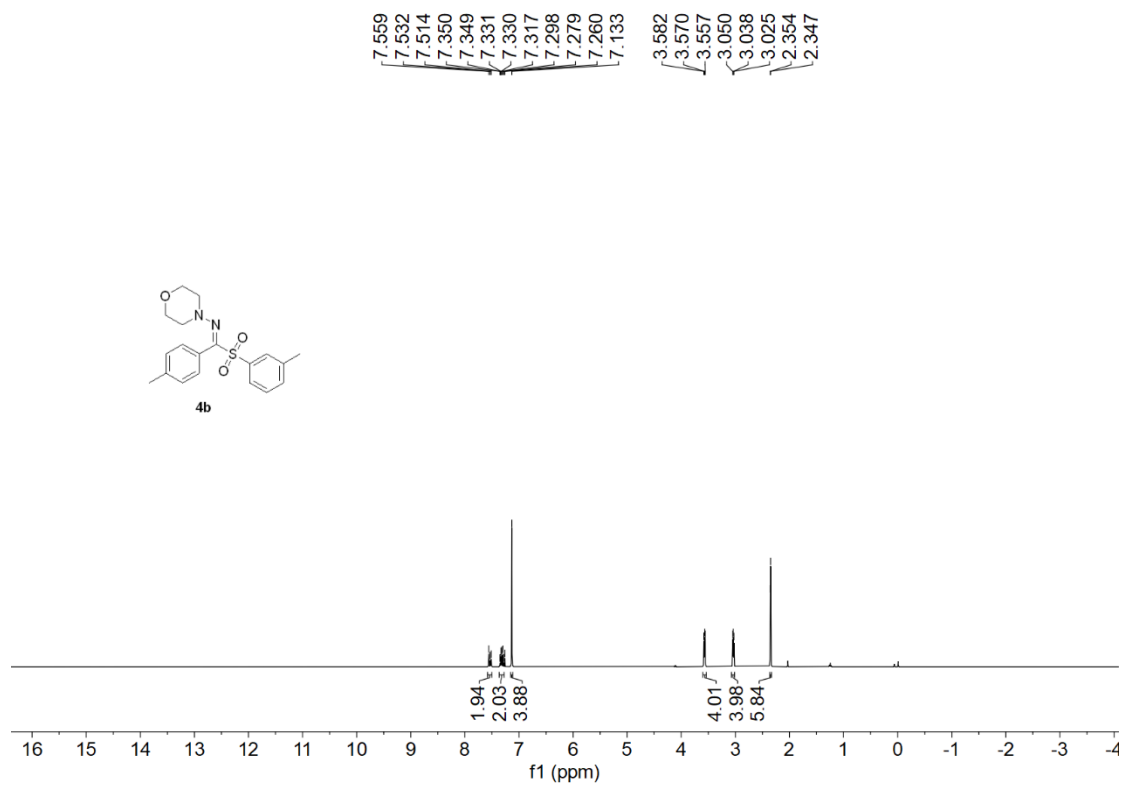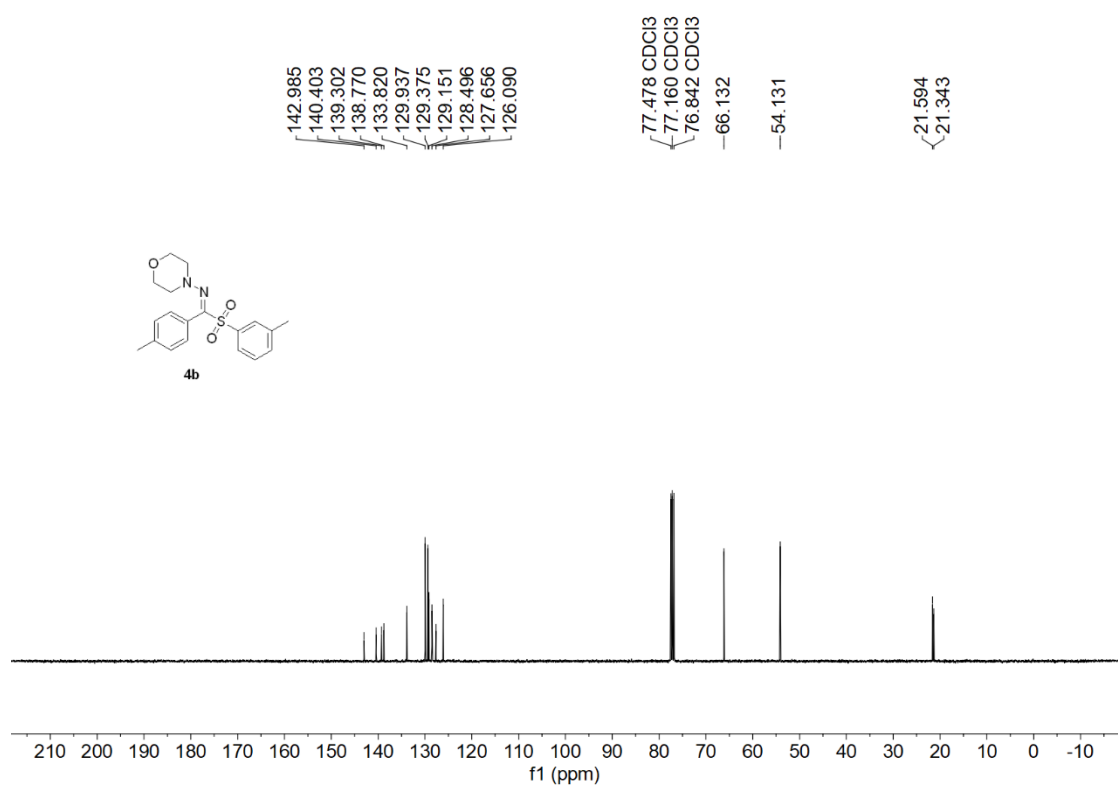

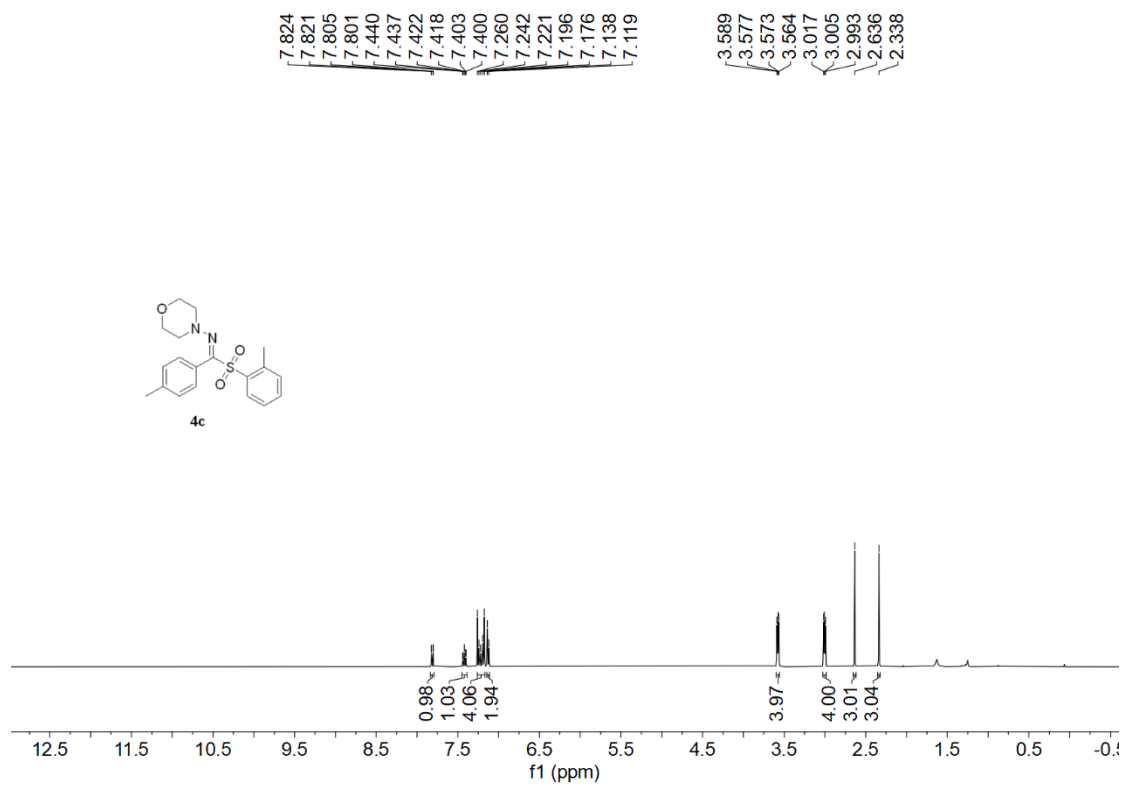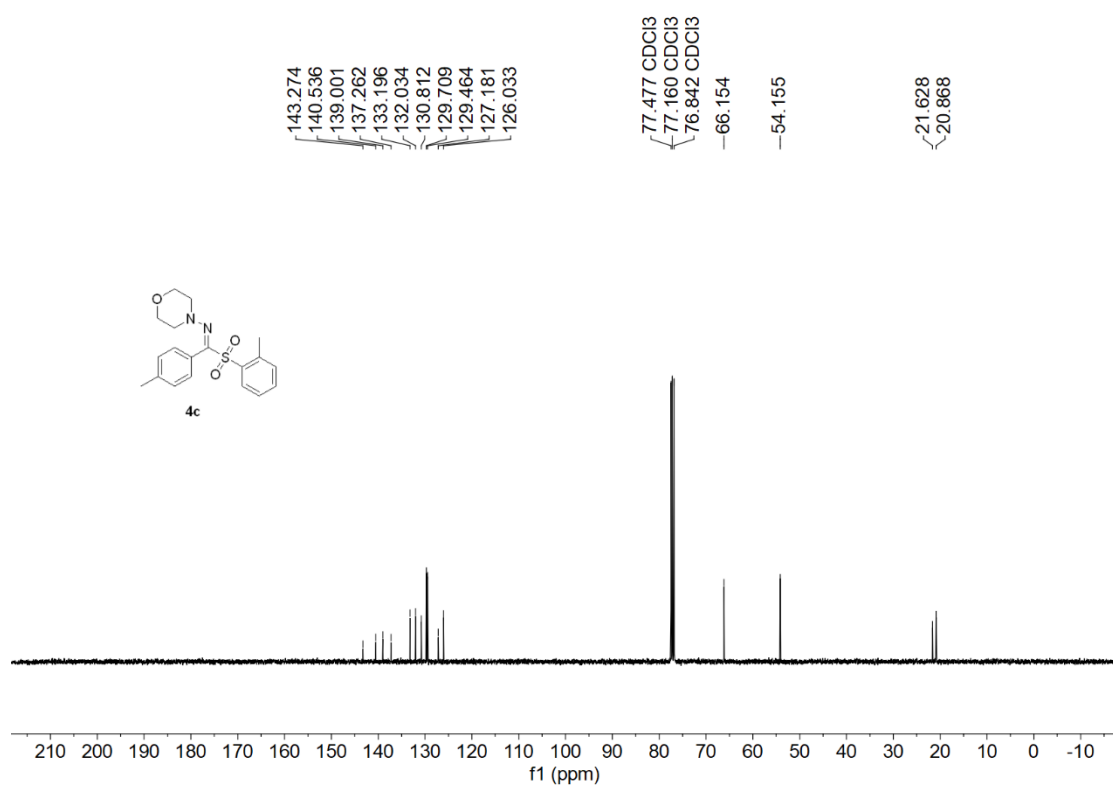

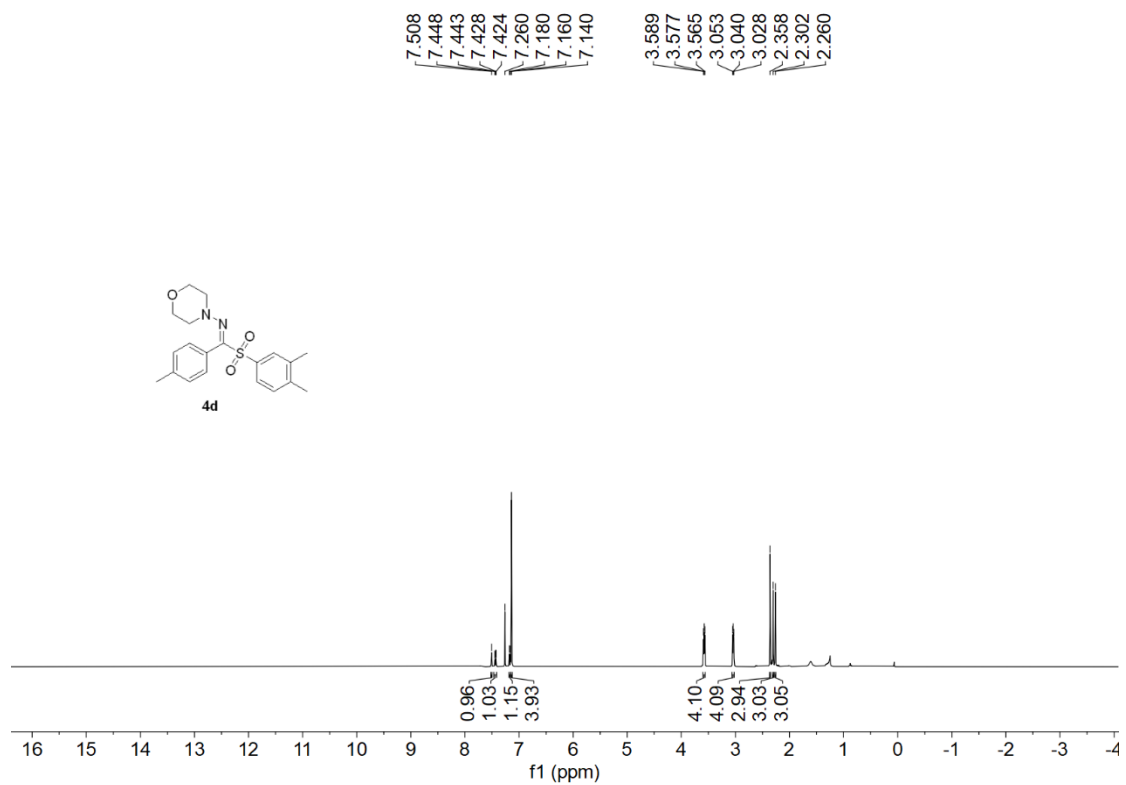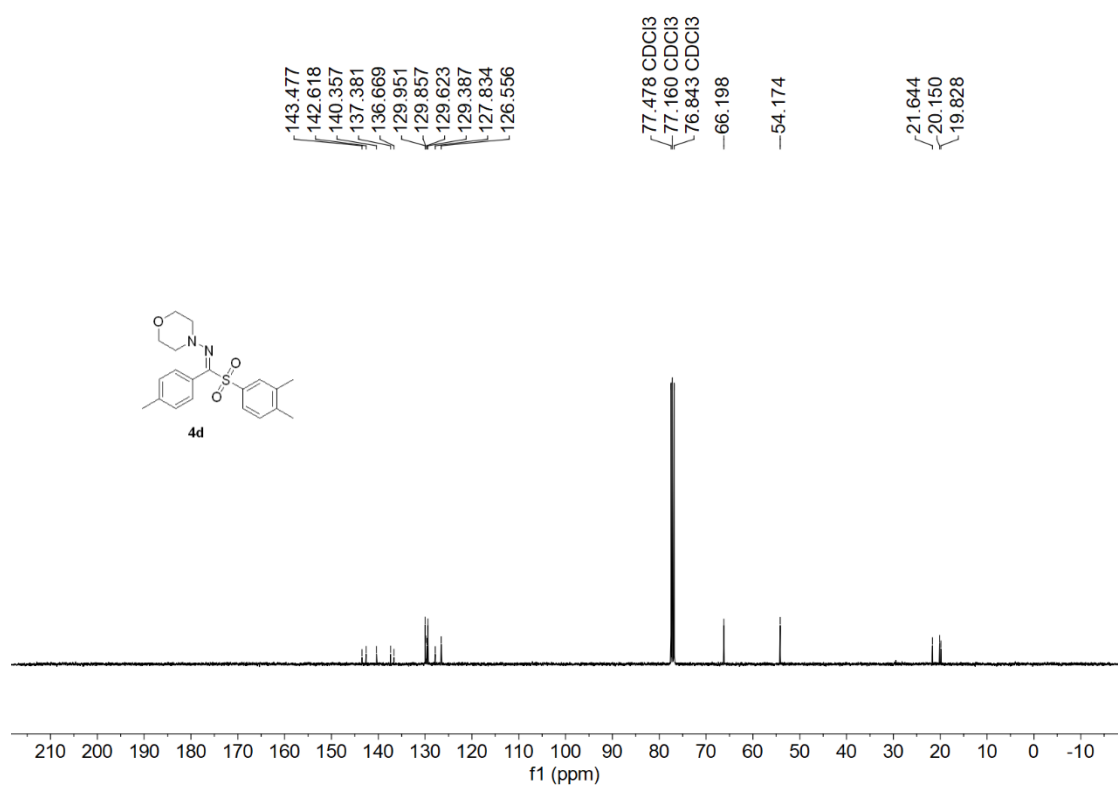

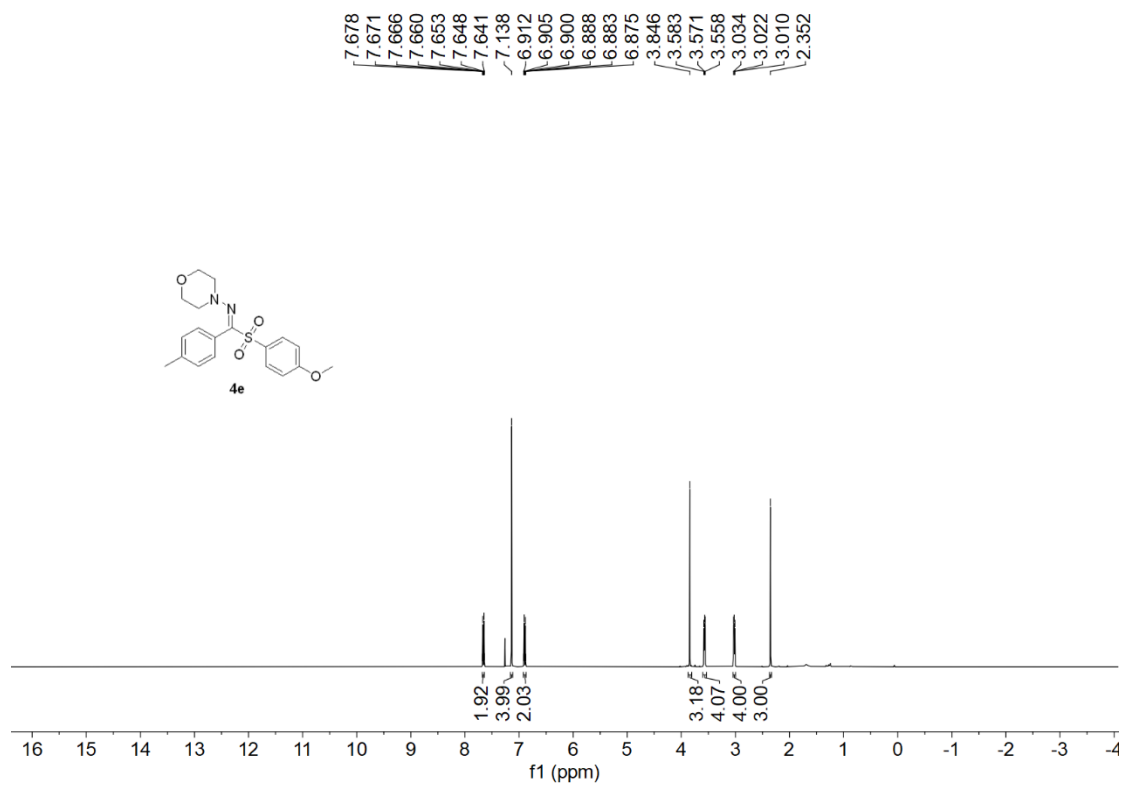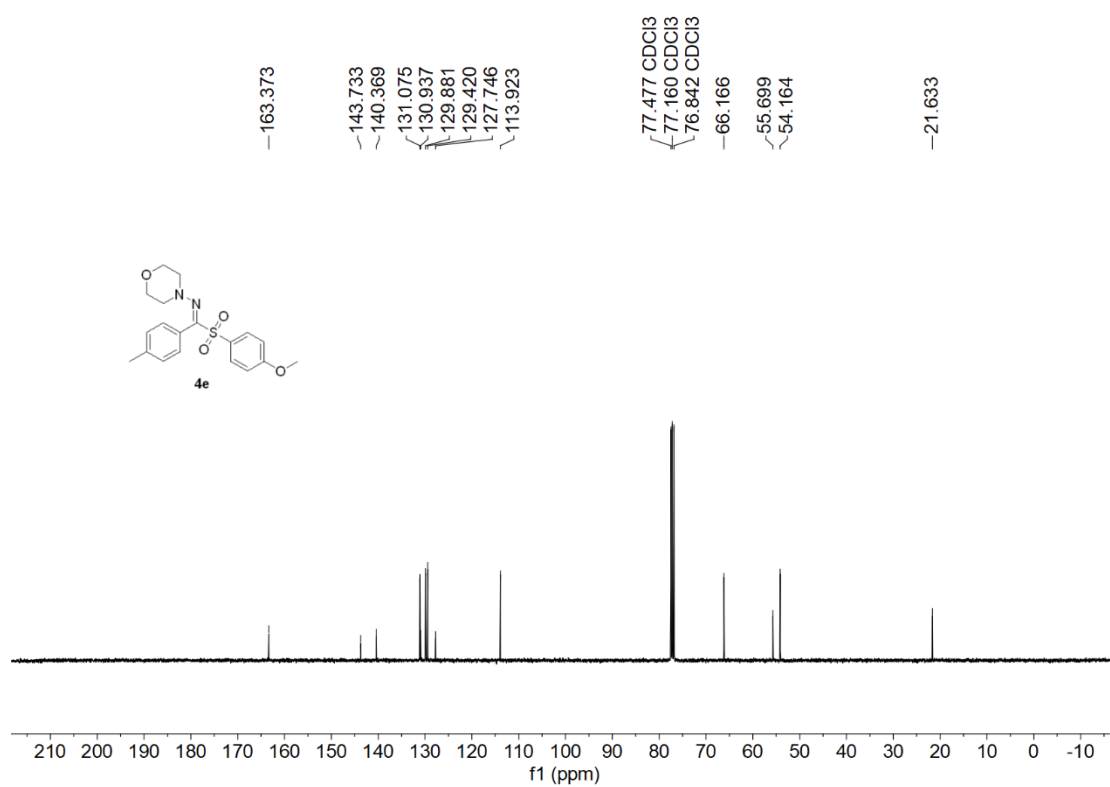

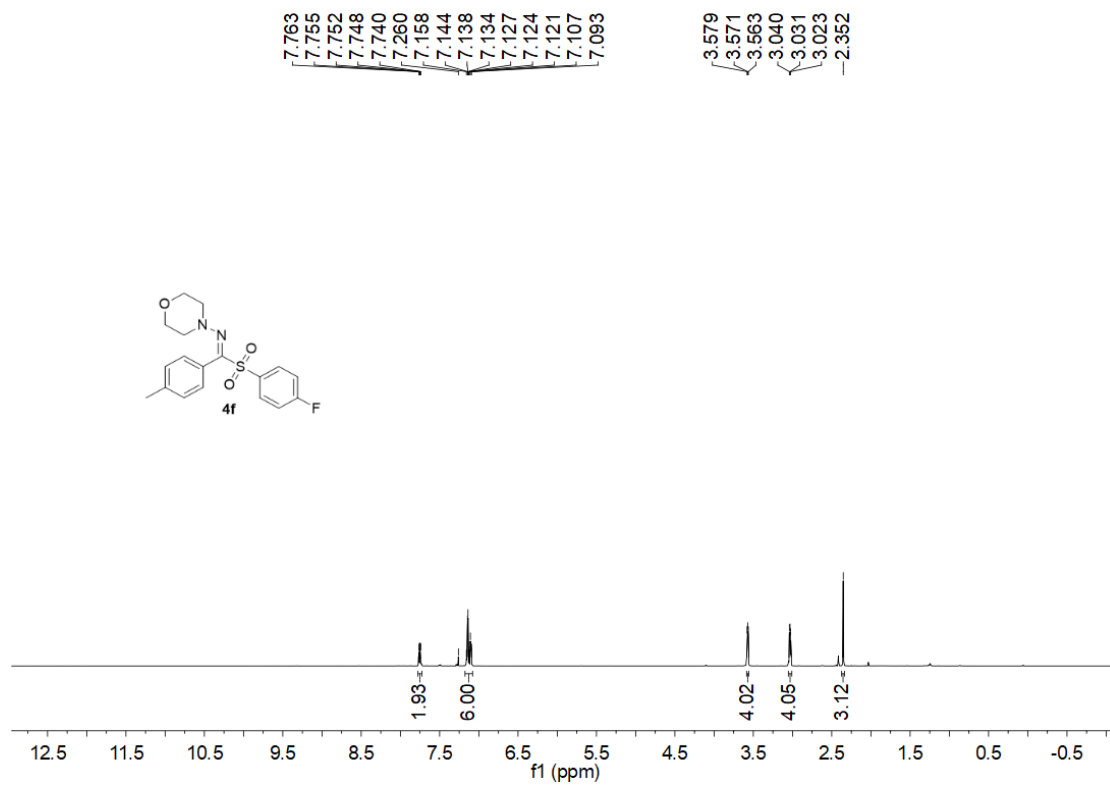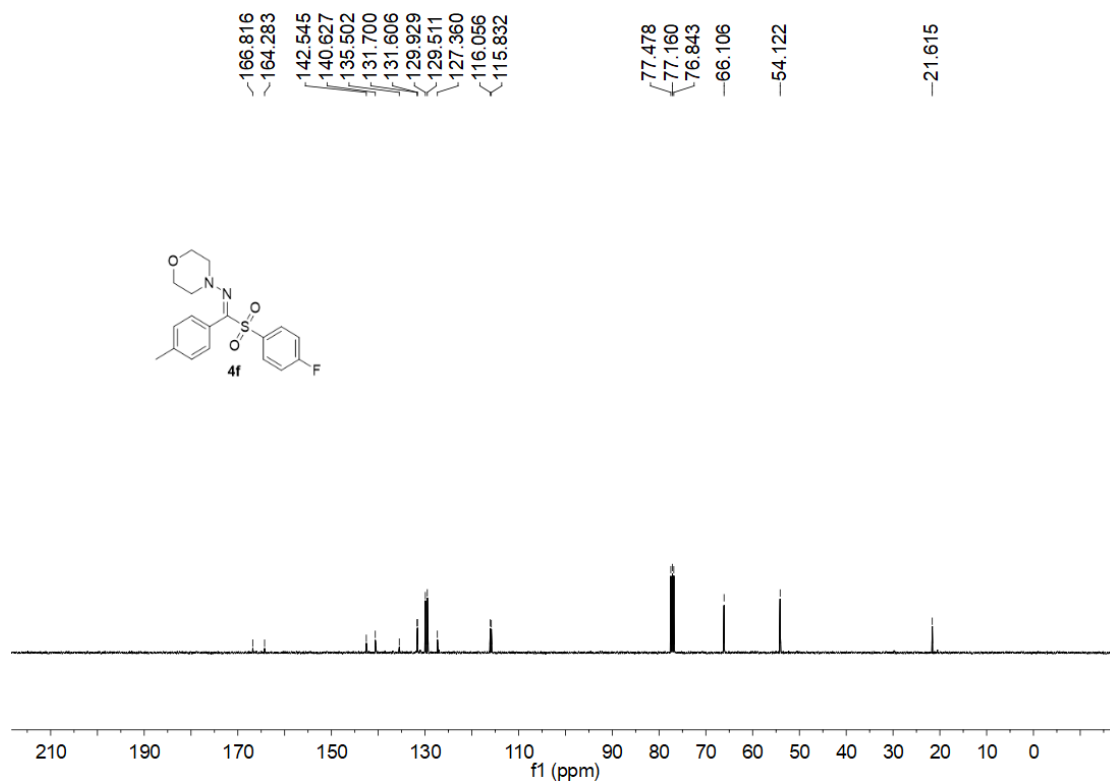

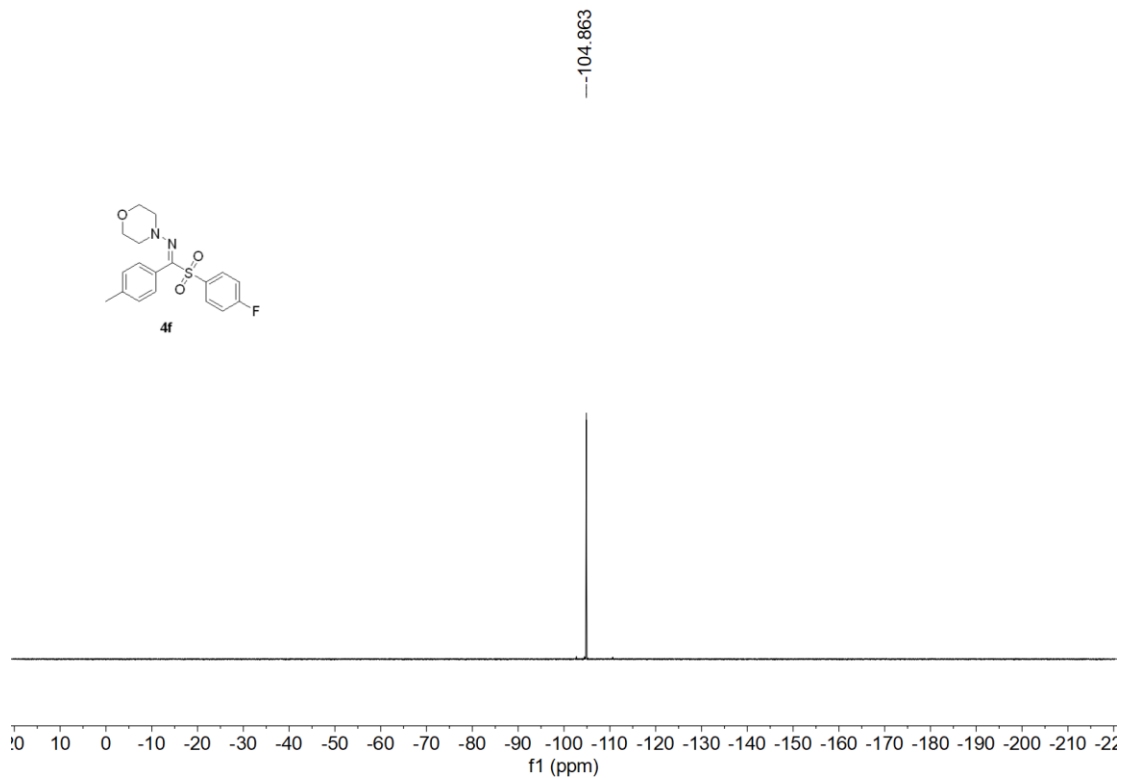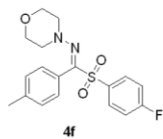

7.703  
7.697  
7.692  
7.680  
7.676  
7.670  
7.423  
7.418  
7.406  
7.401  
7.260  
7.176  
7.155  
7.148  
7.142  
7.127

3.591  
3.579  
3.566  
3.057  
3.044  
3.032  
-2.365

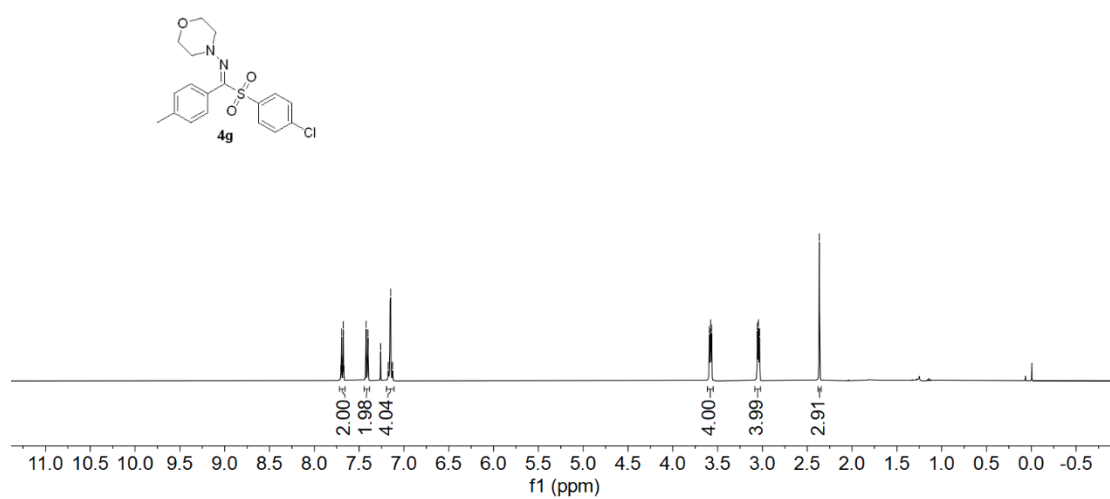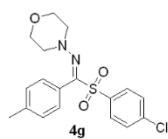

2.00  
1.98  
4.04

4.00  
3.99  
2.91



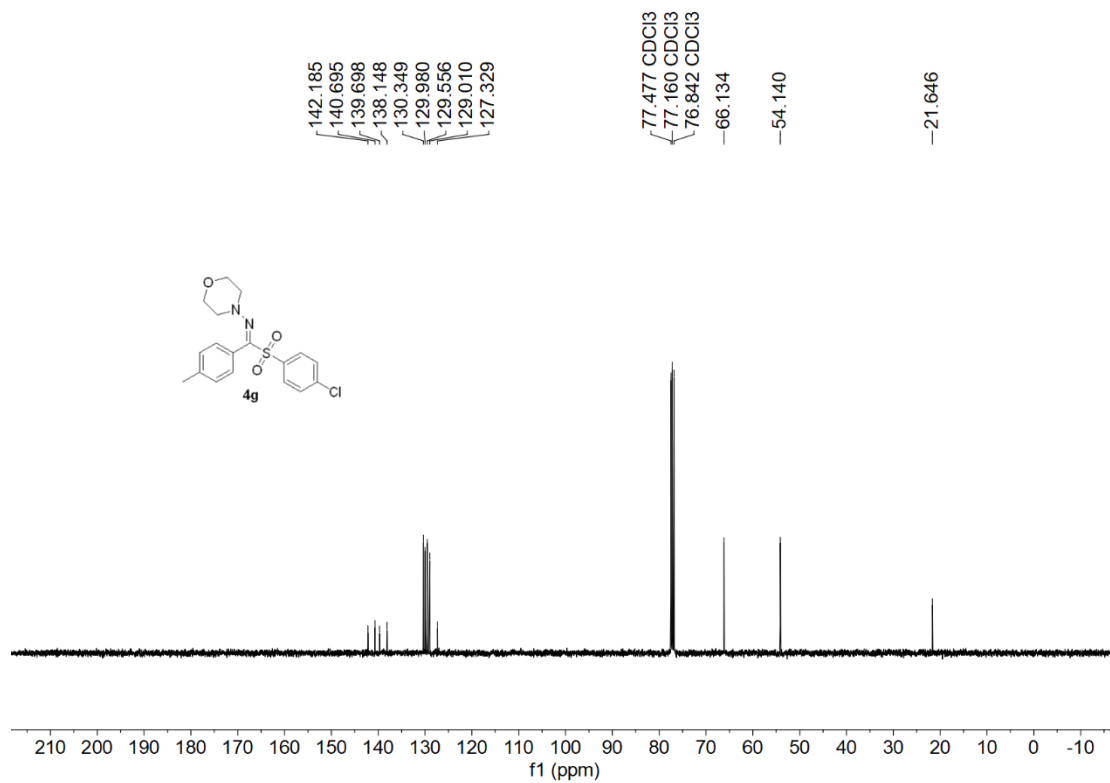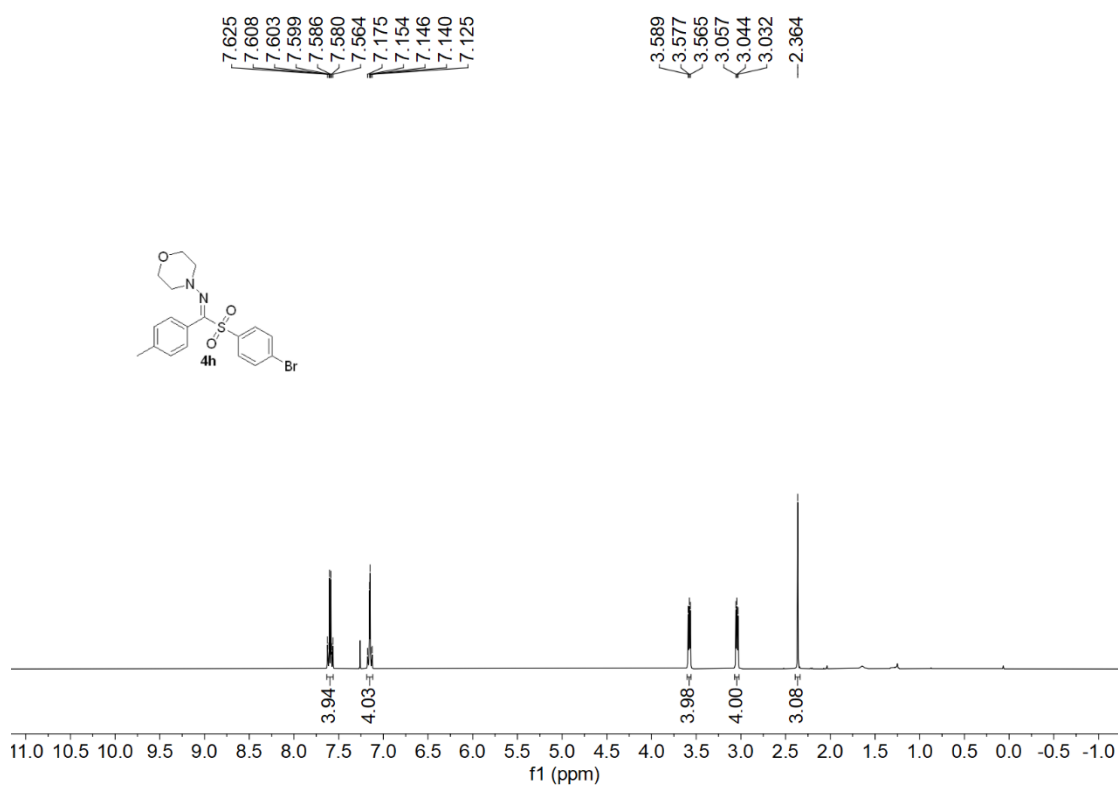

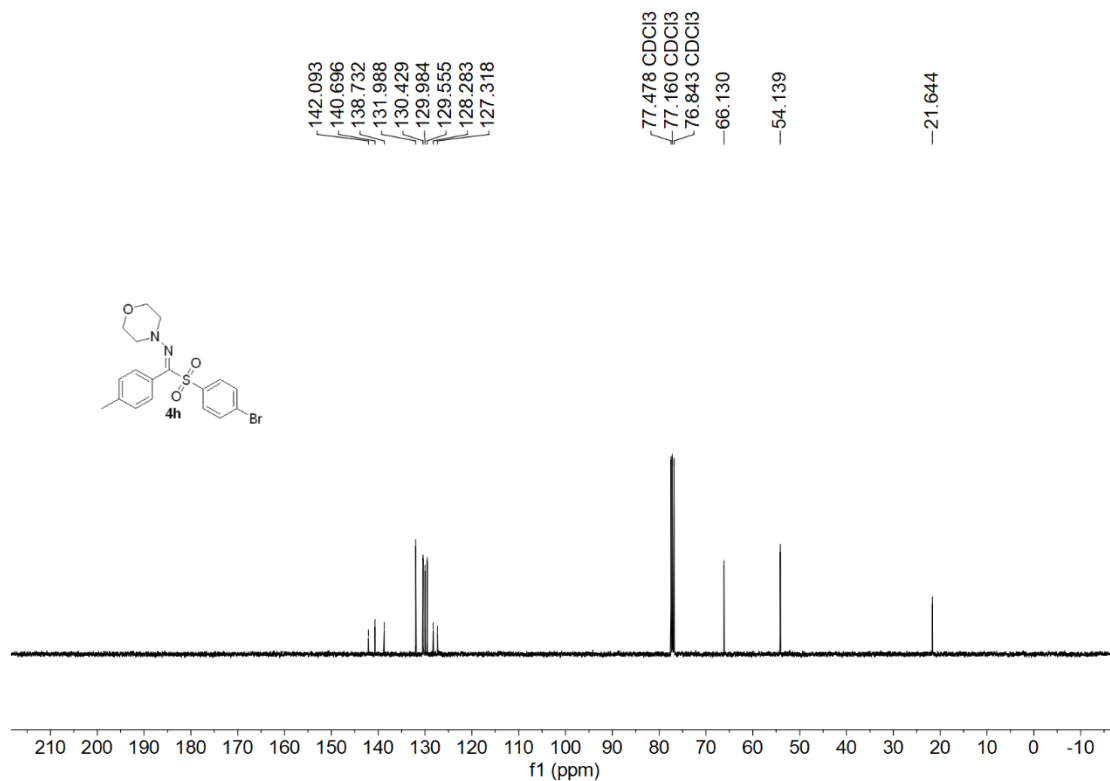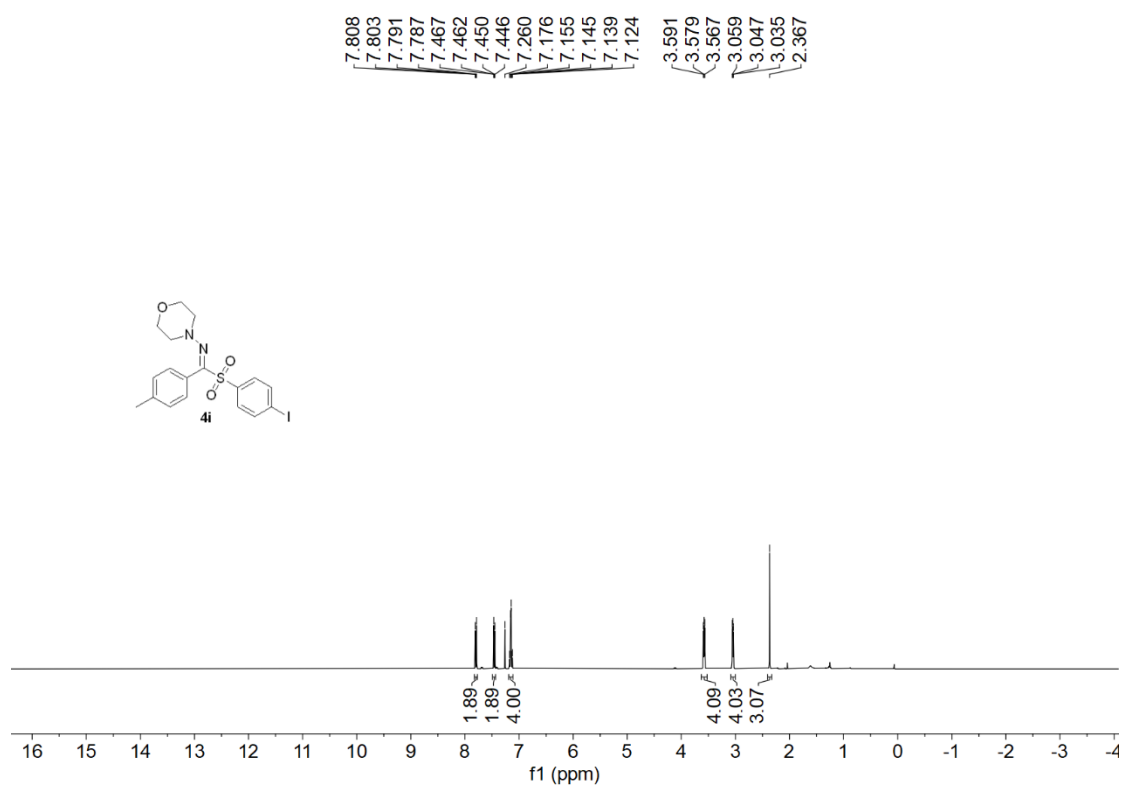

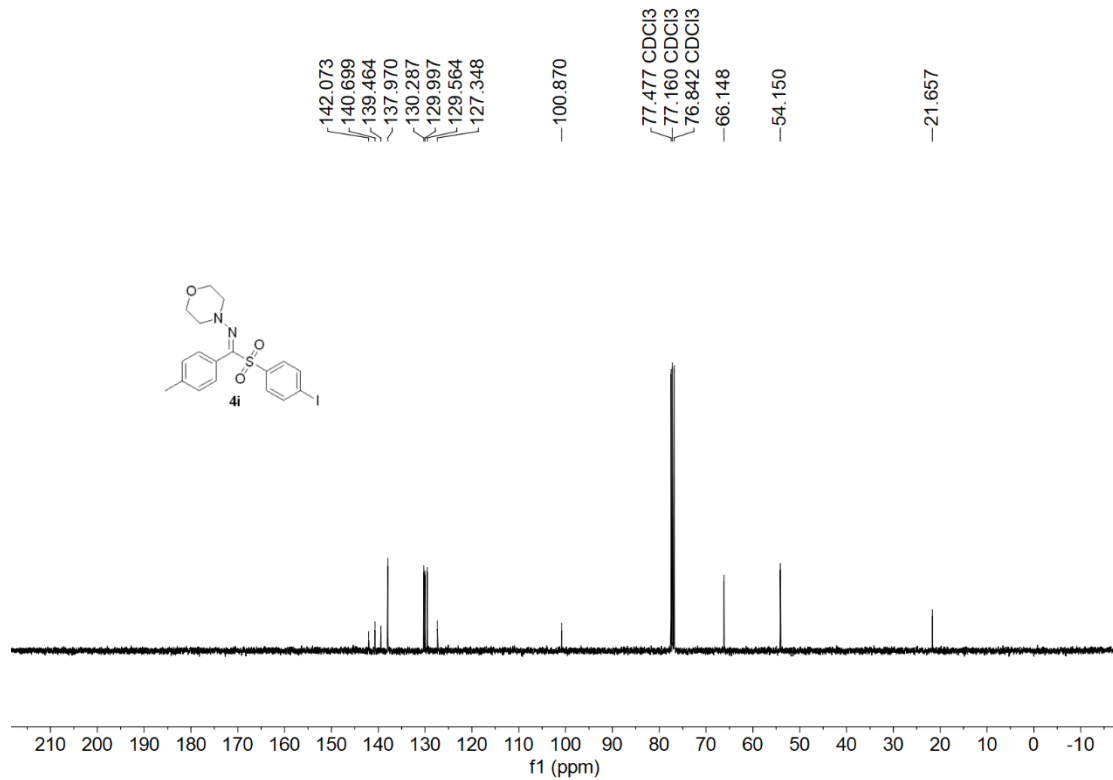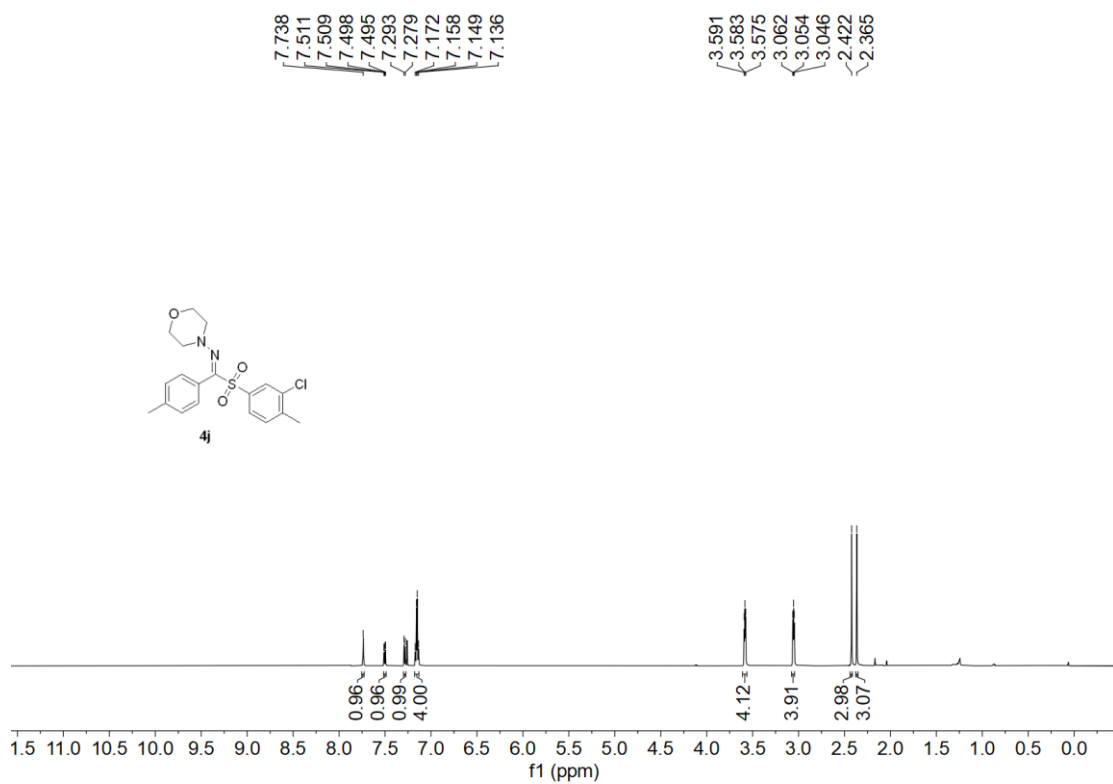

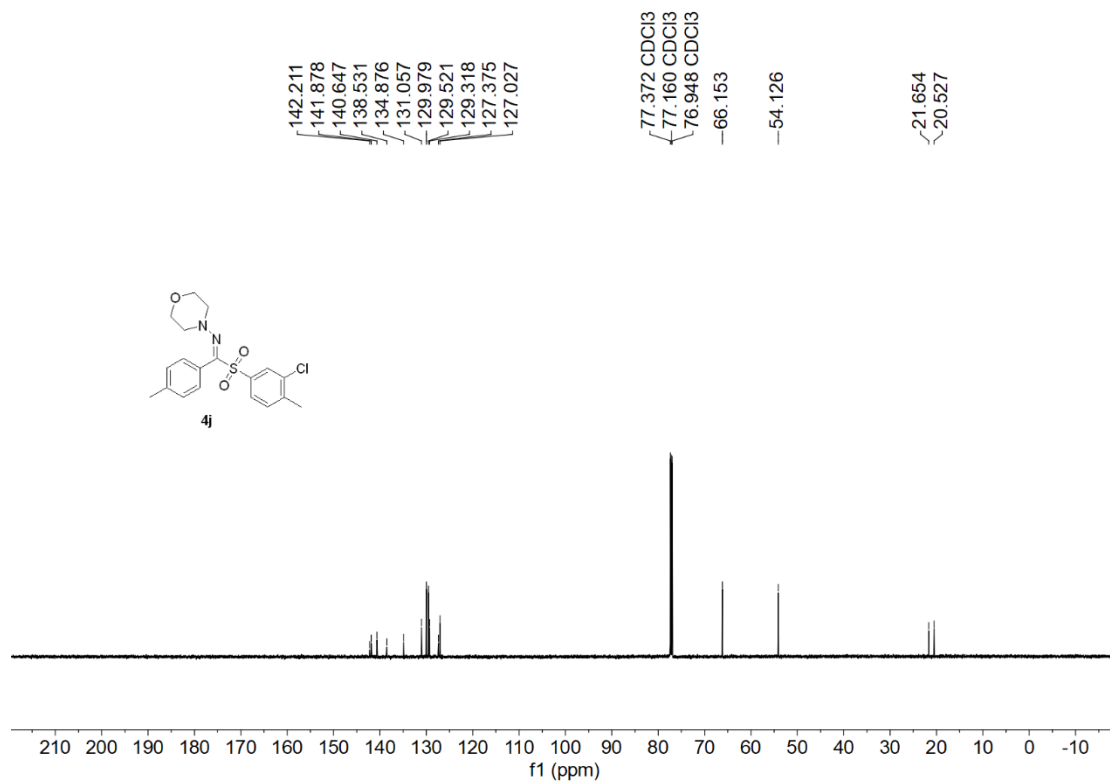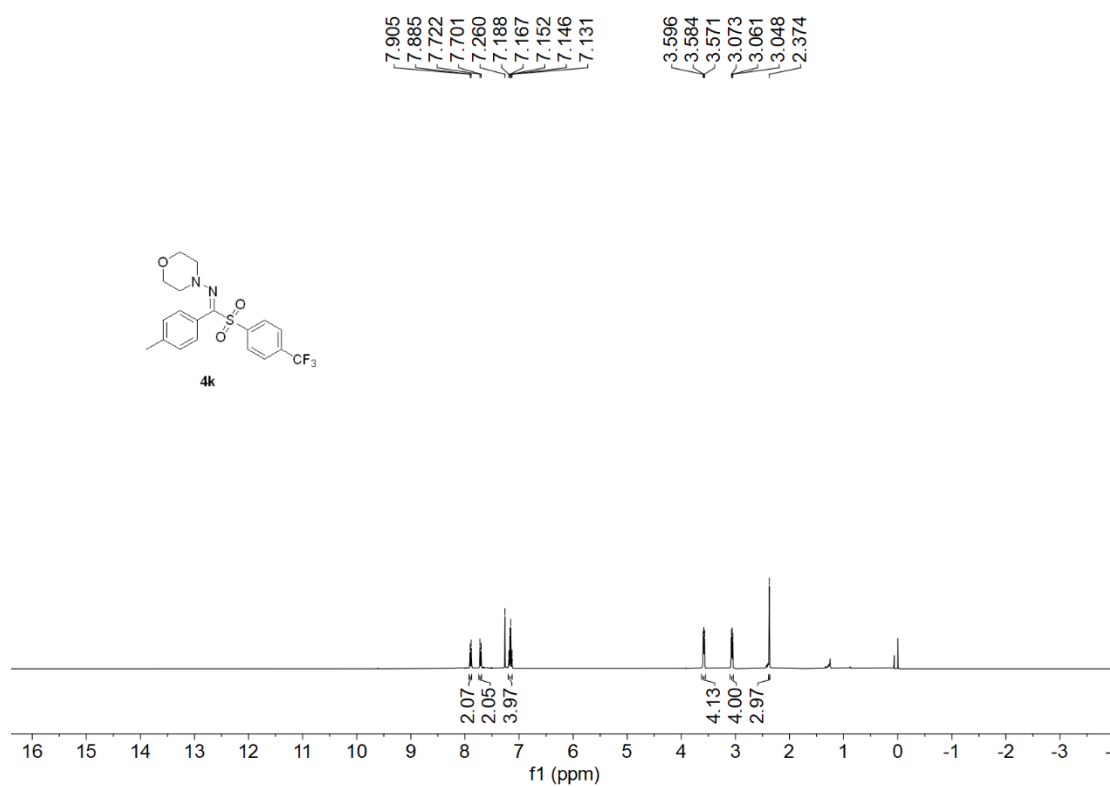

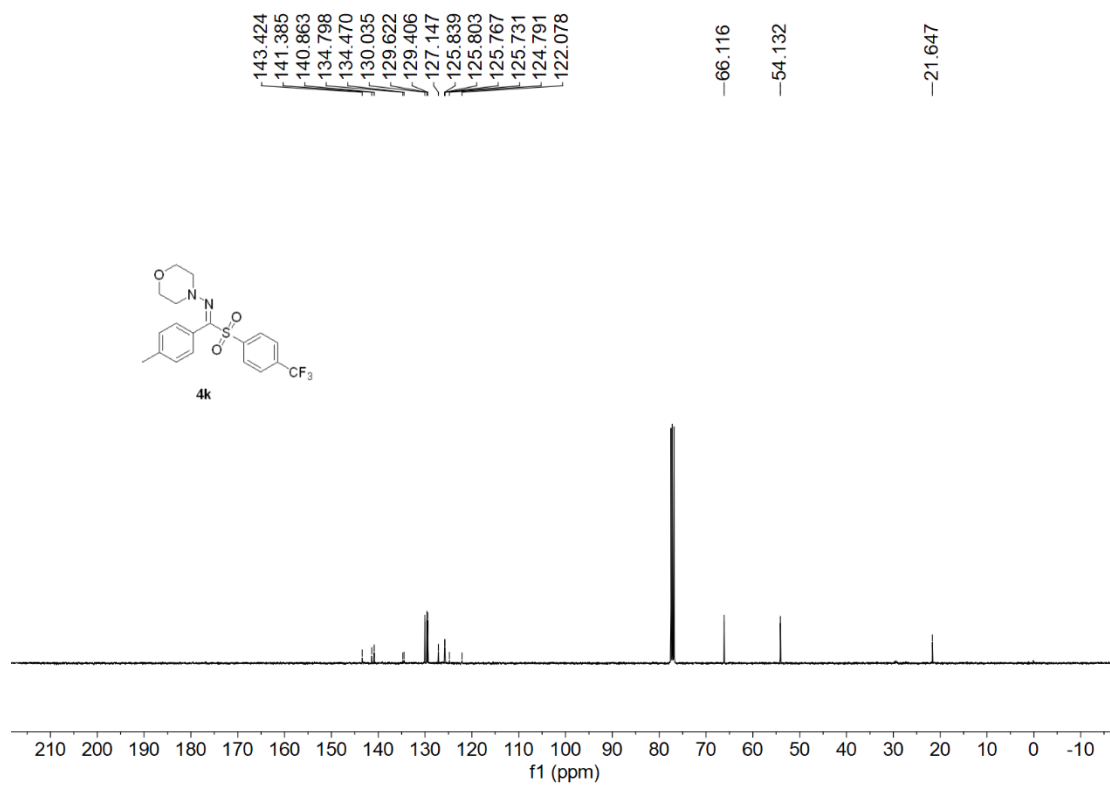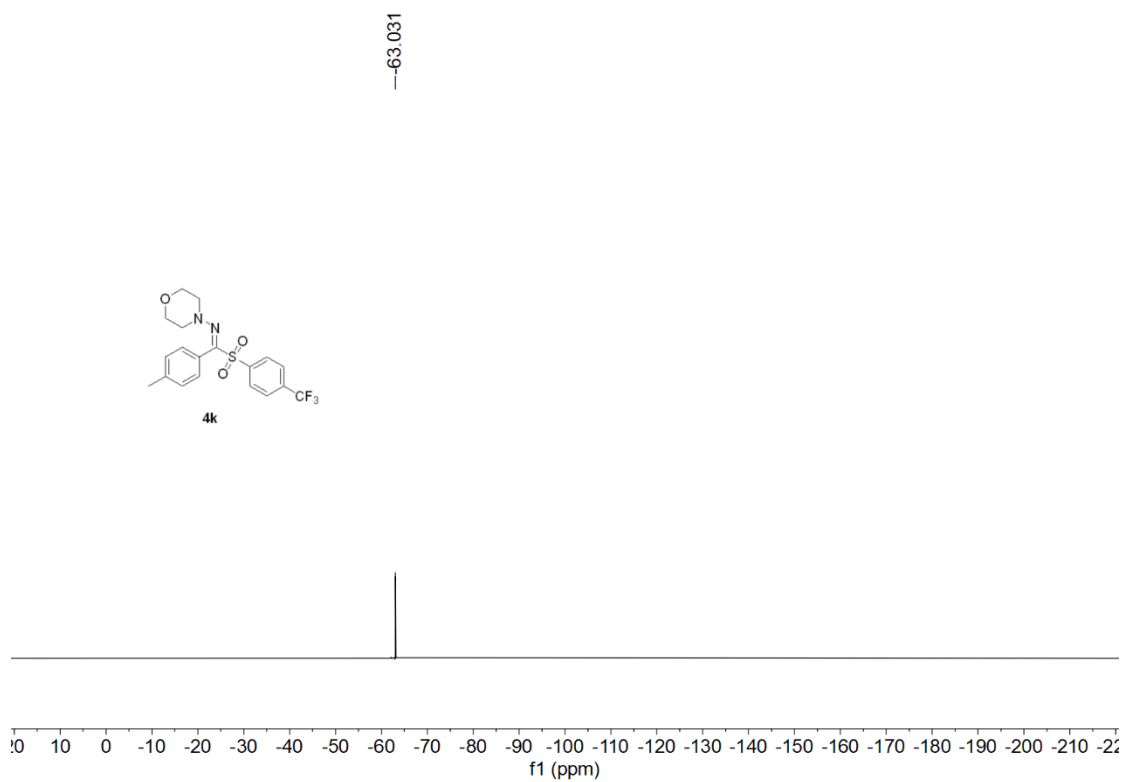

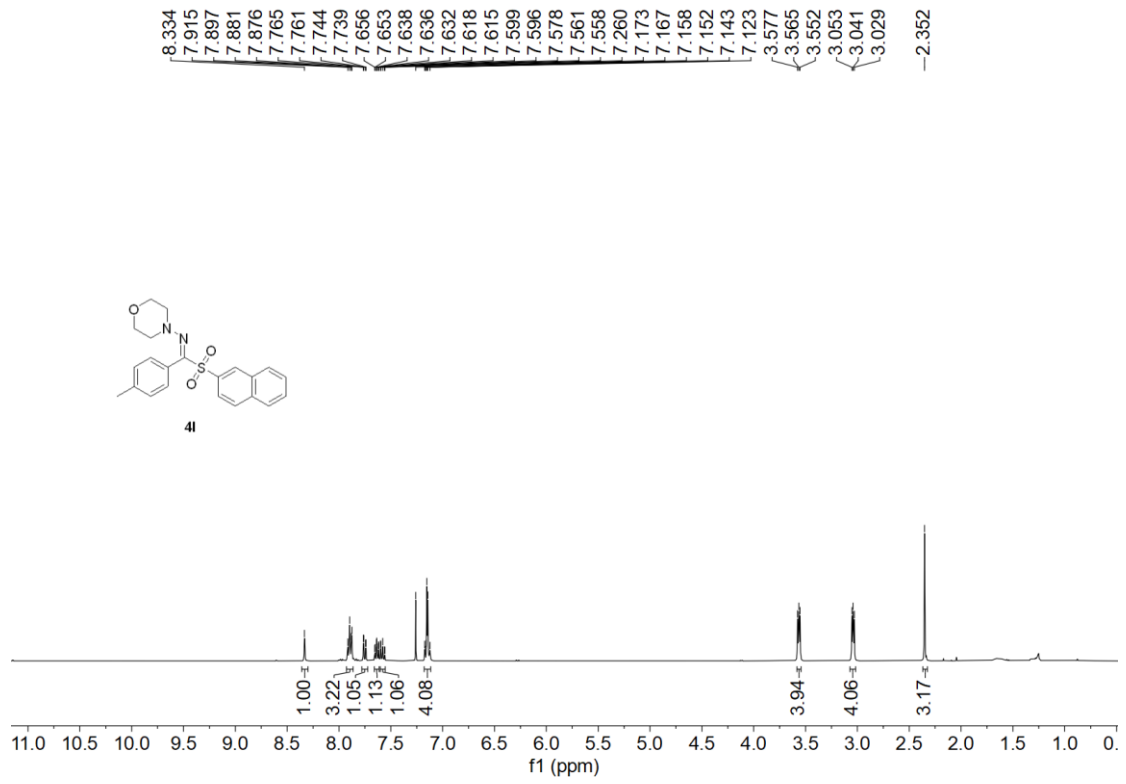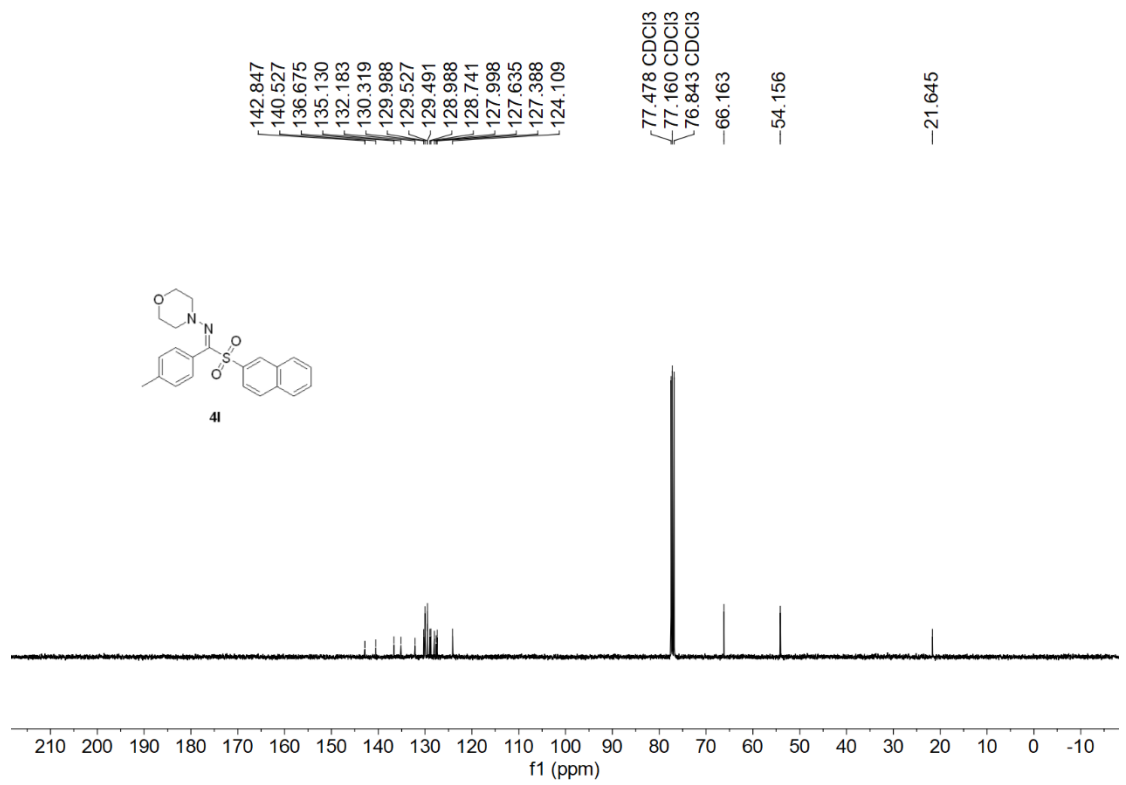

7.589  
7.586  
7.568  
7.565  
7.506  
7.503  
7.488  
7.484  
7.480  
7.468  
7.465  
7.462  
7.392  
7.384  
7.380  
7.374  
7.364  
7.359  
7.356  
7.353  
7.350  
7.346  
7.343  
7.339  
7.325  
7.310  
7.306  
7.304  
7.300  
7.293  
7.288  
7.284  
7.280  
7.270  
7.266  
7.263  
7.260  
7.227  
7.221  
7.218  
7.215  
7.206  
7.201  
7.197  
7.086  
7.083  
7.079  
7.071  
7.066  
7.062  
7.025

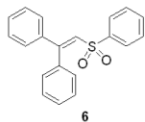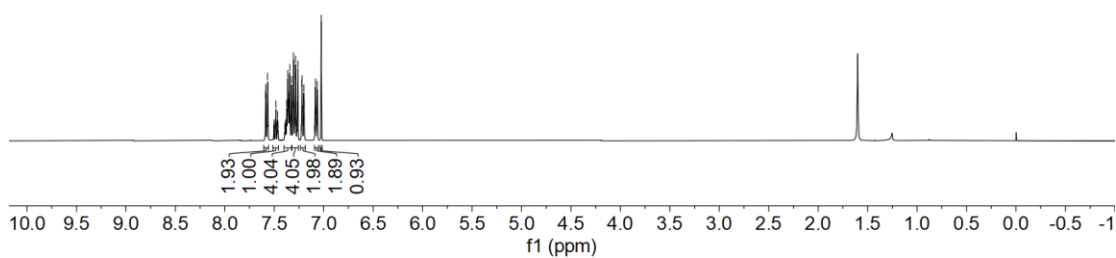

155.377  
141.550  
139.209  
135.577  
132.980  
130.487  
129.895  
129.029  
128.860  
128.813  
128.738  
128.359  
128.008  
127.773  
77.478 CDCl3  
77.160 CDCl3  
76.843 CDCl3

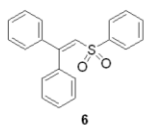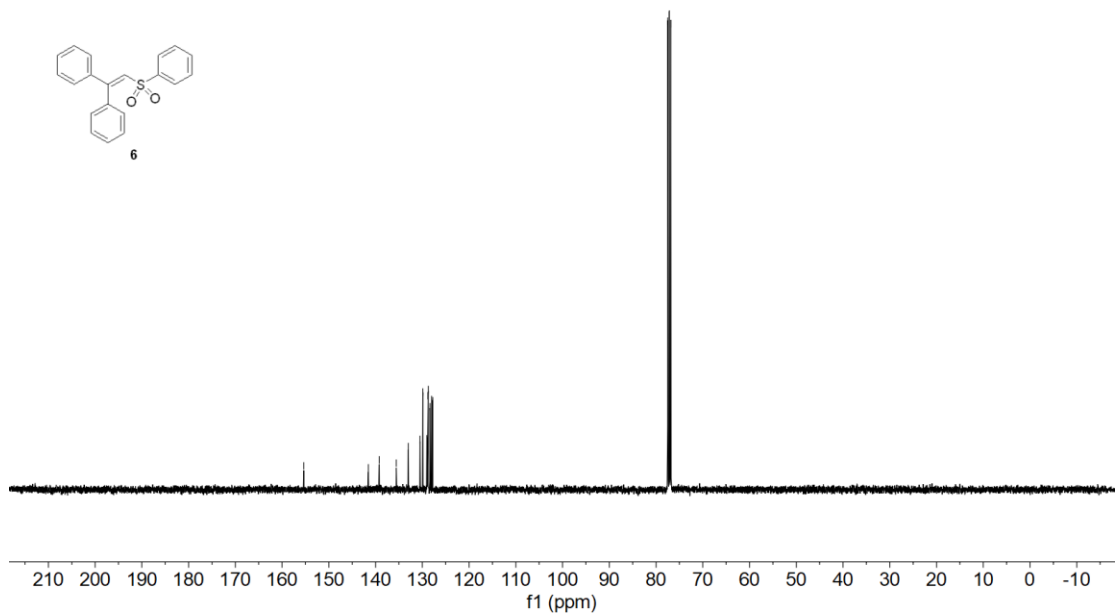

Supplement: d4qo00835a1.pdf [file d4qo00835a1.pdf]
